# Supplementary material
Source: Royal Society of Chemistry journal article supplement (doi:10.1039/d6cc02067d)
Supplement: d6cc02067d1.pdf [file d6cc02067d1.pdf]

## Supporting Information

### **Oxidative C5–H Amination of Imidazo[1,2-*a*]pyrimidine *via* Iodine Catalysis**

Frenki Mahato and Alakananda Hajra\*

Department of Chemistry, Visva-Bharati (A Central University), Santiniketan 731235, India

Email: [alakananda.hajra@visva-bharati.ac.in](mailto:alakananda.hajra@visva-bharati.ac.in)

## Table of contents

|                                                                                   |            |
|-----------------------------------------------------------------------------------|------------|
| <b>1. General Information</b>                                                     | <b>S3</b>  |
| <b>2. Optimization of the Reaction Conditions</b>                                 | <b>S3</b>  |
| <b>3. Experimental procedures</b>                                                 | <b>S4</b>  |
| <b>3.1 Typical experimental procedure for the synthesized compounds (3aa-4cd)</b> | <b>S4</b>  |
| <b>3.2 Typical experimental procedure for the compound 6a.</b>                    | <b>S5</b>  |
| <b>3.3 Large scale synthesis of 3ba</b>                                           | <b>S5</b>  |
| <b>3.4 Experimental procedures for mechanistic studies</b>                        | <b>S6</b>  |
| <b>3.4.1 Reactions in presence of radical scavengers</b>                          | <b>S5</b>  |
| <b>3.4.2 Reactions with <i>N</i>-iodomorpholine hydroiodide (7.HI)</b>            | <b>S6</b>  |
| <b>4. X-ray crystallographic data of 4db</b>                                      | <b>S7</b>  |
| <b>5. Characterization of the starting material and products</b>                  | <b>S8</b>  |
| <b>5.1 Characterization of the starting material</b>                              | <b>S8</b>  |
| <b>5.2 Characterization of the products</b>                                       | <b>S11</b> |
| <b>6. References</b>                                                              | <b>S20</b> |
| <b>7. NMR Spectra for the Synthesized Products</b>                                | <b>S21</b> |

## 1. General information

All reagents were commercially available and used without further purification. All the Imidazo[1,2-*a*]pyrimidine derivatives were prepared according to the literature procedure<sup>1</sup>. TLC was done on silica gel coated glass slide. The column chromatography and thin layer chromatography (TLC) were done using DCM (Dichloromethane) and methanol as solvent combination except for compound **6a**, where combination of ethyl acetate and petroleum ether was used. <sup>1</sup>H NMR spectra were determined on 400 MHz spectrometer as solutions in DMSO-*d*<sub>6</sub> and CDCl<sub>3</sub>. Chemical shifts are expressed in parts per million ( $\delta$ ) and the signals were reported as s (singlet), d (doublet), t (triplet), m (multiplet) and coupling constants (*J*) were given in Hz. <sup>13</sup>C{<sup>1</sup>H} NMR spectra were recorded at 100 MHz in CDCl<sub>3</sub> and DMSO-*d*<sub>6</sub>. <sup>19</sup>F NMR spectra were recorded at 376 MHz in CDCl<sub>3</sub> and DMSO-*d*<sub>6</sub>. Chemical shifts as internal standards were referenced to and DMSO-*d*<sub>6</sub> ( $\delta$  = 2.50 for <sup>1</sup>H and  $\delta$  = 39.52 for <sup>13</sup>C{<sup>1</sup>H} NMR) and CDCl<sub>3</sub> ( $\delta$  = 7.26 for <sup>1</sup>H and  $\delta$  = 77.16 for <sup>13</sup>C{<sup>1</sup>H} NMR) as internal standard. High-resolution mass spectra (HRMS) were collected using electrospray ionization (ESI) on a time-of-flight (TOF) mass spectrometer. Melting points (M.P) were determined after recrystallization of the solid compounds from a solution of methanol/petroleum ether (1:3).

## 2 Optimization of the Reaction Conditions

**Table S1.** Optimization of the Reaction Conditions

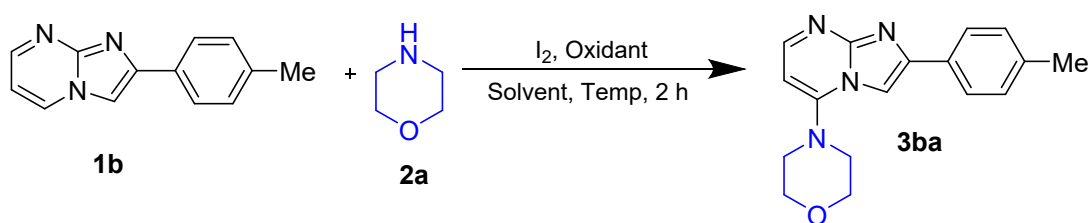

| Entry    | Temp ( C ) | $I_2$ (mol%) | Oxidant (3equiv.) | Solvent (2.0 mL) | Yield (%)                 |
|----------|------------|--------------|-------------------|------------------|---------------------------|
| 1        | rt         | 15           | TBHP              | 1,2-DCE          | 60                        |
| 2        | 50         | 15           | TBHP              | 1,2-DCE          | 72                        |
| <b>3</b> | <b>60</b>  | <b>15</b>    | <b>TBHP</b>       | <b>1,2-DCE</b>   | <b>80, 78<sup>a</sup></b> |
| 4        | 70         | 15           | TBHP              | 1,2-DCE          | 79                        |
| 5        | 60         | -            | TBHP              | 1,2-DCE          | nr                        |
| 6        | 60         | 5            | TBHP              | 1,2-DCE          | 65                        |
| 7        | 60         | 10           | TBHP              | 1,2-DCE          | 75                        |
| 8        | 60         | 20           | TBHP              | 1,2-DCE          | 80                        |



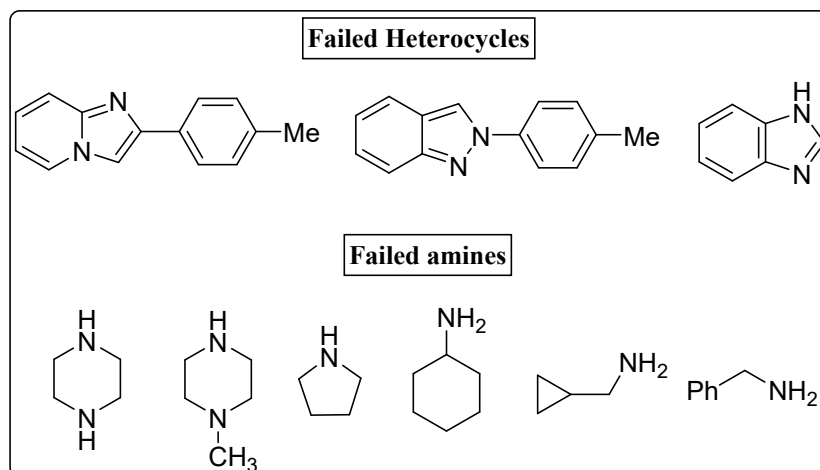

### 3.2 Typical experimental procedure for the compound 6a.

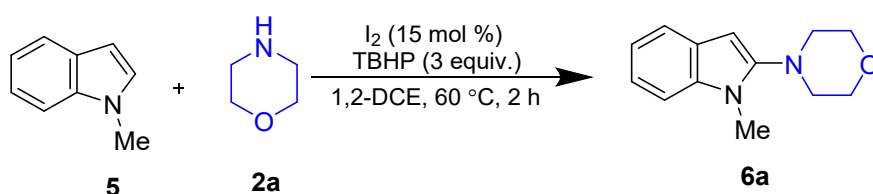

A mixture of N-methyl indole (0.25 mmol) (**5**), iodine (15 mol%) in 2mL 1,2-DCE were taken in an oven dried reaction tube. Then morpholine **2** (0.5 mmol) was added to the mixture followed by 3 equiv. of TBHP. The mixture was then allowed to stir at 60 °C for 2 h. After the completion, reaction mixture was quenched by saturated Na<sub>2</sub>S<sub>2</sub>O<sub>3</sub> solution and extracted with dichloromethane (DCM). The combined organic layers were dried over anhydrous Na<sub>2</sub>SO<sub>4</sub> and concentrated under reduced pressure. The obtained residue was purified through column chromatography on silica gel using mixture of petroleum ether and ethyl acetate as eluent to give the product **6a**.

### 3.3 Large scale synthesis of 3ba

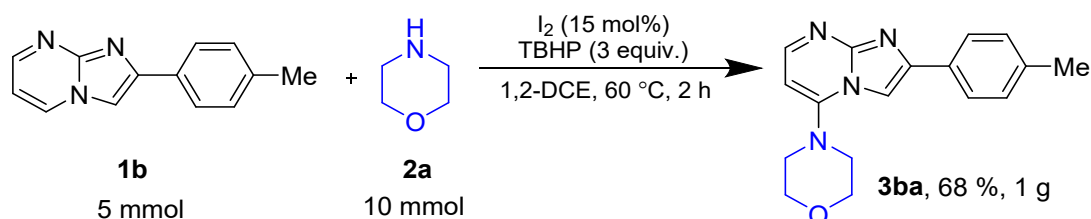

A mixture of 2-(*p*-tolyl)imidazo[1,2-*a*]pyrimidine **1b** (5 mmol, 1.04 g), iodine (15 mol%, 190 mg) in 2mL 1,2-DCE were taken in a pre-dried round bottom flask. Then morpholine **2a** (10 mmol, 870 mg) was added to the mixture followed by TBHP (15 mmol, 1.35 g). The mixture

was then allowed to stir at 60 °C for 2 h. After the completion, reaction mixture was quenched by saturated Na<sub>2</sub>S<sub>2</sub>O<sub>3</sub> solution and extracted with dichloromethane (DCM). The combined organic layers were dried over anhydrous Na<sub>2</sub>SO<sub>4</sub> and concentrated under reduced pressure. The obtained residue was purified through column chromatography on silica gel using mixture of dichloromethane (DCM) and methanol (MeOH) as eluent to give the aminated product **3ba** (68%, 1 g).

### 3.4 Experimental procedures for mechanistic studies

#### 3.4.1 Reactions in presence of radical scavengers

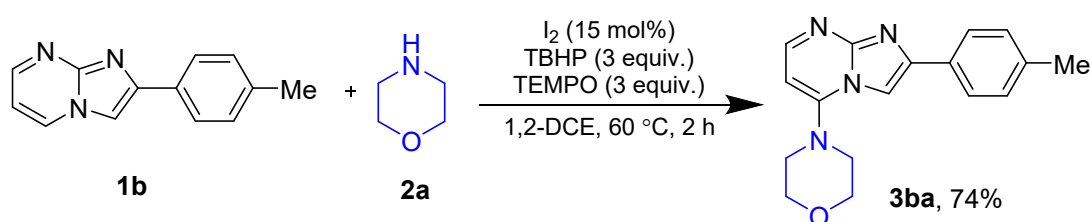

2-(*p*-tolyl)imidazo[1,2-*a*]pyrimidine **1b** (0.25 mmol), iodine (15 mol%) in 2 mL 1,2-DCE were taken in a pre-dried reaction tube. Then morpholine **2a** (0.5 mmol), TBHP (in decane, 3 equiv.), TEMPO (2,2,6,6-tetramethylpiperidine-1-oxyl) (3 equiv.) were added to the reaction mixture and allowed to stir at 60 °C for 2 h. After completion of the reaction, aminated product found in 74% yield.

In case of BHT (2,6-di-*tert*-butyl-4-methylphenol) as radical scavenger the product found in 52%.

#### 3.4.2 Reactions with *N*-iodomorpholine hydroiodide (**7**)

*N*-iodomorpholine hydroiodide was prepared using morpholine and molecular iodine according to reported method.<sup>3</sup>

**Entry 1:** A mixture of 2-(*p*-tolyl)imidazo[1,2-*a*]pyrimidine **1b** (0.25 mmol), *N*-iodomorpholine hydroiodide **7** (0.50 mmol) were taken in 2 mL 1,2-DCE and stirred at 60 °C, under open atmosphere for 2 h.

**Entry 2:** A mixture of 2-(*p*-tolyl)imidazo[1,2-*a*]pyrimidine **1b** (0.25 mmol), *N*-iodomorpholine hydroiodide **7** (0.50 mmol), TBHP (in decane, 3equiv.) were taken in 2 mL 1,2-DCE and stirred at 60 °C, under open atmosphere for 2 h.

**Entry 3:** A mixture of 2-(*p*-tolyl)imidazo[1,2-*a*]pyrimidine **1b** (0.25 mmol), *N*-iodomorpholine hydroiodide **7** (0.2 equiv.), morpholine **2a** (0.50 mmol), TBHP (in decane, 3 equiv.) were taken in 2 mL 1,2-DCE and stirred at 60 °C, under open atmosphere for 2 h.

#### 4. X-ray crystallographic data 4db:

|                             |                                                                |                  |
|-----------------------------|----------------------------------------------------------------|------------------|
| <b>Wavelength</b>           | 0.71073 Å                                                      |                  |
| <b>Formula</b>              | C <sub>17</sub> H <sub>18</sub> N <sub>4</sub> OS <sub>2</sub> |                  |
| <b>Crystal system</b>       | monoclinic                                                     |                  |
| <b>Space group</b>          | P2 <sub>1</sub> /n                                             |                  |
| <b>Unit cell dimensions</b> | a = 8.3706(4) Å                                                | α = 90°          |
|                             | b = 20.1042(9) Å                                               | β = 94.0050(10)° |
|                             | c = 10.0708(5) Å                                               | γ = 90°          |
| <b>Volume</b>               | 1690.62(14) Å <sup>3</sup>                                     |                  |
| <b>Z</b>                    | 4                                                              |                  |
| <b>R-factor (%)</b>         | 6.85                                                           |                  |

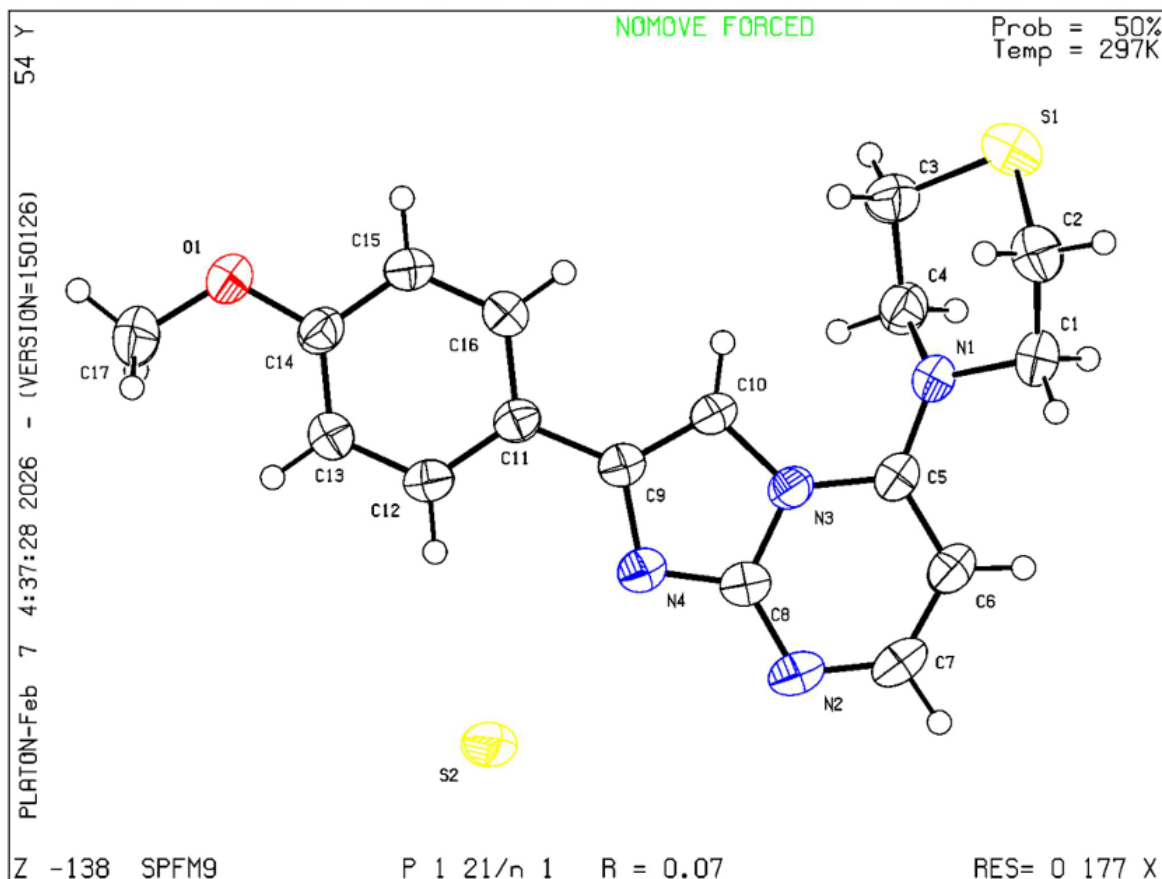

## 5. Characterization of the starting material and products

### 5.1 Characterization of the starting material

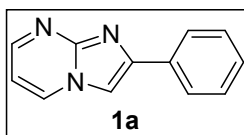

**2-phenylimidazo[1,2-a]pyrimidine (1a)<sup>1,2</sup>:** Creamy colored solid; <sup>1</sup>H NMR (400 MHz, DMSO-*d*<sub>6</sub>): δ 8.96 (d, *J* = 5.2 Hz, 1H), 8.52 (s, 1H), 8.38 (s, 1H), 8.00 (d, *J* = 7.6 Hz, 2H), 7.46 (d, *J* = 6.8 Hz, 2H), 7.36 (d, *J* = 7.2 Hz, 1H), 7.05 (s, 1H).

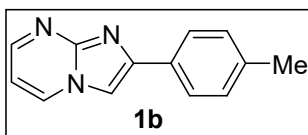

**2-(*p*-tolyl)imidazo[1,2-a]pyrimidine (1b)<sup>2</sup>:** Creamy colored solid; <sup>1</sup>H NMR (400 MHz, DMSO-*d*<sub>6</sub>): δ 9.36-9.35 (m, 1H), 8.96 (d, *J* = 2.8 Hz, 1H), 8.79 (s, 1H), 7.96 (d, *J* = 8.0 Hz, 2H), 7.62-7.60 (m, 1H), 7.36 (d, *J* = 8.4 Hz, 2H), 2.36 (s, 3H).

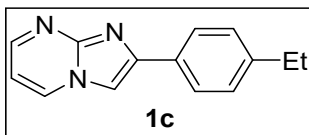

**2-(4-ethylphenyl)imidazo[1,2-a]pyrimidine (1c):** Creamy colored solid; M.p. 183-185 °C ; <sup>1</sup>H NMR (400 MHz, DMSO-*d*<sub>6</sub>): δ 8.95 (d, *J* = 5.2 Hz, 1H), 8.50 (s, 1H), 8.33 (s, 1H), 7.91 (d, *J* = 7.2 Hz, 2H), 7.29 (d, *J* = 6.8 Hz, 2H), 7.04 (t, *J* = 5.2 Hz, 1H), 2.66-2.60 (m, 2H), 1.19 (t, *J* = 7.2 Hz, 3H); <sup>13</sup>C{<sup>1</sup>H} NMR (100 MHz, DMSO-*d*<sub>6</sub>): δ 150.2, 148.0, 145.5, 144.0, 135.0, 130.9, 128.3, 125.8, 108.9, 107.2, 28.0, 15.6; HRMS (ESI-TOF) *m/z*: [M + H]<sup>+</sup> Calcd for C<sub>14</sub>H<sub>13</sub>N<sub>3</sub>: 224.1182; found: 224.1145.

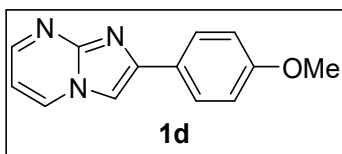

**2-(4-methoxyphenyl)imidazo[1,2-a]pyrimidine (1d)<sup>1,2</sup>:** Creamy colored solid; <sup>1</sup>H NMR (400 MHz, DMSO-*d*<sub>6</sub>): δ 8.94 (d, *J* = 6.4 Hz, 1H), 8.49 (s, 1H), 8.28 (s, 1H), 7.94 (d, *J* = 8.4 Hz, 2H), 7.27-7.20 (m, 1H), 7.04 (d, *J* = 8.8 Hz, 1H), 3.80 (s, 3H).

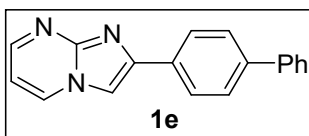

**2-(1,1'-biphenyl-4-yl)imidazo[1,2-a]pyrimidine (1e):** Creamy colored solid; M.p. 234-236 °C; <sup>1</sup>H NMR (400 MHz, DMSO-*d*<sub>6</sub>): δ 8.98 (d, *J* = 6.0 Hz, 1H), 8.54 (s, 1H), 8.45 (s, 1H), 8.10 (d, *J* = 8.0 Hz, 1H), 7.79-7.73 (m, 3H), 7.48 (t, *J* = 7.6 Hz, 1H), 7.39 (d, *J* = 7.2 Hz, 1H), 7.30-7.17 (m, 3H), 7.08-7.06 (t, *J* = 5.2 Hz, 1H); <sup>13</sup>C{<sup>1</sup>H} NMR (100 MHz, DMSO-*d*<sub>6</sub>): δ 150.5, 148.1, 144.9, 139.8, 139.7, 135.1, 132.5, 129.0, 127.6, 127.1, 126.6, 126.3, 109.0, 107.8; HRMS (ESI-TOF) *m/z*: [M + H]<sup>+</sup> Calcd for C<sub>18</sub>H<sub>13</sub>N<sub>3</sub>: 272.1182; found: 272.1144.

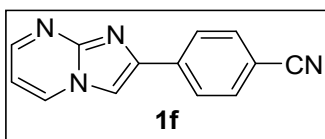

**4-(imidazo[1,2-a]pyrimidin-2-yl)benzonitrile (1f):** Creamy colored solid; M.p. above 250 °C ; <sup>1</sup>H NMR (400 MHz, DMSO-*d*<sub>6</sub>): δ 9.00 (d, *J* = 5.2 Hz, 1H), 8.57 (s, 1H), 8.19 (d, *J* = 7.6 Hz, 2H), 7.92 (d, *J* = 7.6 Hz, 2H), 7.27 (s, 1H), 7.10 (s, 1H); <sup>13</sup>C{<sup>1</sup>H} NMR (100 MHz, DMSO-*d*<sub>6</sub>): δ 151.5, 148.2, 143.2, 138.0, 135.5, 132.9, 126.3, 119.0, 110.3, 109.7, 109.4; HRMS (ESI-TOF) *m/z*: [M + H]<sup>+</sup> Calcd for C<sub>13</sub>H<sub>8</sub>N<sub>4</sub>: 221.0822; found: 221.0785.

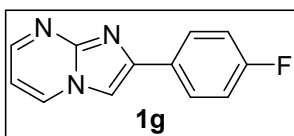

**2-(4-fluorophenyl)imidazo[1,2-a]pyrimidine (1g)<sup>1,2</sup>:** Creamy colored solid; <sup>1</sup>H NMR (400 MHz, DMSO-*d*<sub>6</sub>): δ 8.96 (d, *J* = 6.0 Hz, 1H), 8.52 (s, 1H), 8.36 (s, 1H), 8.03 (d, *J* = 6.4 Hz, 2H), 7.28 (d, *J* = 8.4 Hz, 2H), 7.05 (d, *J* = 5.2 Hz, 1H).

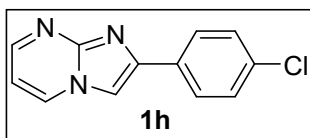

**2-(4-chlorophenyl)imidazo[1,2-a]pyrimidine (1h)<sup>2</sup>:** Creamy colored solid; <sup>1</sup>H NMR (400 MHz, DMSO-*d*<sub>6</sub>): δ 8.98 (d, *J* = 6.0 Hz, 1H), 8.53 (s, 1H), 8.44 (s, 1H), 8.02 (d, *J* = 8.4 Hz, 2H), 7.52 (d, *J* = 8.0 Hz, 2H), 7.08-7.05 (t, *J* = 5.6 Hz, 1H).

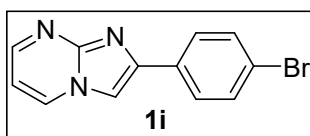

**2-(4-iodophenyl)imidazo[1,2-a]pyrimidine (1i)<sup>2</sup>:** Creamy colored solid; <sup>1</sup>H NMR (400 MHz, DMSO-*d*<sub>6</sub>): δ 9.00-8.97 (m, 1H), 8.54-8.53 (m, 1H), 8.44 (s, 1H), 7.95 (d, *J* = 8.4 Hz, 2H), 7.66 (d, *J* = 8.4 Hz, 2H), 7.08-7.05 (m, 1H).

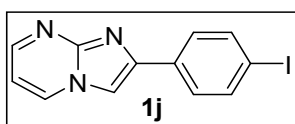

**2-(4-iodophenyl)imidazo[1,2-a]pyrimidine (1j):** Creamy colored solid; M.p. 248-250 °C <sup>1</sup>H NMR (400 MHz, DMSO-*d*<sub>6</sub>): δ 8.96 (d, *J* = 6.0 Hz, 1H), 8.53 (s, 1H), 8.42 (s, 1H), 7.81 (s, 1H), 7.31-7.19 (m, 2H), 7.06 (s, 1H); <sup>13</sup>C{<sup>1</sup>H} NMR (100 MHz, DMSO-*d*<sub>6</sub>): δ 150.7, 148.1, 144.2, 137.6, 135.2, 133.0, 127.8, 109.1, 108.0, 94.5; HRMS (ESI-TOF) *m/z*: [M + H]<sup>+</sup> Calcd for C<sub>12</sub>H<sub>8</sub>IN<sub>3</sub>: 321.9836; found: 321.9800.

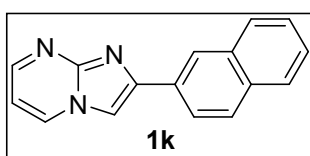

**2-(naphthalen-2-yl)imidazo[1,2-a]pyrimidine (1k):** Creamy colored solid; M.p. 220-222 °C <sup>1</sup>H NMR (400 MHz, DMSO-*d*<sub>6</sub>): δ 9.01 (s, 1H), 8.59-8.54 (m, 2H), 8.12 (s, 1H), 8.01-7.94 (m, 2H), 7.53-7.41 (m, 2H), 7.28-7.16 (m, 3H); <sup>13</sup>C{<sup>1</sup>H} NMR (100 MHz, DMSO-*d*<sub>6</sub>): δ 150.8, 148.1, 144.9, 135.3, 133.2, 132.9, 130.7, 128.4, 128.3, 127.7, 126.6, 126.3, 124.5, 123.9, 109.1, 108.2; HRMS (ESI-TOF) *m/z*: [M + H]<sup>+</sup> Calcd for C<sub>16</sub>H<sub>11</sub>N<sub>3</sub>: 246.1026; found: 246.0989.

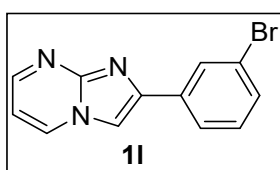

**2-(3-bromophenyl)imidazo[1,2-a]pyrimidine (1l):** Creamy colored solid; M.p. 208-210 °C; <sup>1</sup>H NMR (400 MHz, DMSO-*d*<sub>6</sub>): δ 9.01-8.98 (m, 1H), 8.55-8.54 (m, 1H), 8.50 (s, 1H), 8.18 (s, 1H), 7.99 (d, *J* = 8.0 Hz, 1H), 7.54 (d, *J* = 8.0 Hz, 1H), 7.43 (d, *J* = 7.6 Hz, 1H), 7.09-7.06 (m, 1H); <sup>13</sup>C{<sup>1</sup>H} NMR (100 MHz, DMSO-*d*<sub>6</sub>): δ 151.0, 148.0, 143.5, 135.8, 135.4, 131.1, 130.9, 128.2, 124.7, 122.3, 109.26, 108.5; HRMS (ESI-TOF) *m/z*: [M + H]<sup>+</sup> Calcd for C<sub>12</sub>H<sub>8</sub>BrN<sub>3</sub>: 273.9974; found: 273.9940.

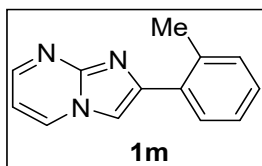

**2-(*o*-tolyl)imidazo[1,2-a]pyrimidine (1m):** Creamy colored solid; M.p. 128-130 °C; <sup>1</sup>H NMR (400 MHz, DMSO-*d*<sub>6</sub>): δ 8.96-8.93 (m, 1H), 8.54-8.53 (m, 1H), 8.16 (s, 1H), 7.91-7.88 (m, 1H), 7.30-7.28 (m, 2H), 7.07-7.04 (m, 1H), 2.53 (s, 3H); <sup>13</sup>C{<sup>1</sup>H} NMR (100 MHz, DMSO-*d*<sub>6</sub>): δ 150.8, 147.4, 145.2, 135.7, 135.2, 132.9, 131.3, 129.4, 128.2, 126.3, 110.3, 109.1, 21.7; HRMS (ESI-TOF) *m/z*: [M + H]<sup>+</sup> Calcd for C<sub>13</sub>H<sub>11</sub>N<sub>3</sub>: 210.1026; found: 210.0986.

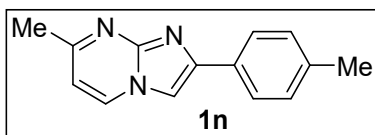

**7-methyl-2-(*p*-tolyl)imidazo[1,2-a]pyrimidine (1n):** Creamy colored solid; M.p. 224-226 °C; <sup>1</sup>H NMR (400 MHz, DMSO-*d*<sub>6</sub>): δ 8.76 (d, *J* = 6.8 Hz, 1H), 8.19 (s, 1H), 7.83 (d, *J* = 8.0 Hz, 2H), 7.25 (d, *J* = 8.0 Hz, 2H), 6.93 (d, *J* = 7.2 Hz, 1H), 2.51 (s, 3H), 2.32 (s, 3H); <sup>13</sup>C{<sup>1</sup>H} NMR (100 MHz, DMSO-*d*<sub>6</sub>): δ 160.1, 148.2, 144.8, 137.7, 134.4, 130.9, 129.6, 125.7, 109.8, 106.7, 24.7, 21.1; HRMS (ESI-TOF) *m/z*: [M + H]<sup>+</sup> Calcd for C<sub>14</sub>H<sub>13</sub>N<sub>3</sub>: 224.1182; found: 224.1161.

## 5.2 Characterization of the products

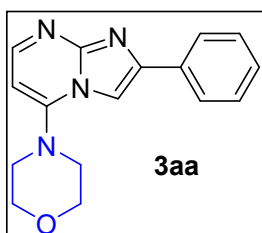

**4-(2-phenylimidazo[1,2-a]pyrimidin-5-yl)morpholine (3aa):** Light yellow solid (79%, 55 mg); *R<sub>f</sub>* = 0.60 (DCM/MeOH = 96 : 4); M.p. 96-98 °C; <sup>1</sup>H NMR (400 MHz, DMSO-*d*<sub>6</sub>): δ 8.52 (d, *J* = 5.2 Hz, 1H), 8.34 (s, 1H), 8.12 (d, *J* = 7.6 Hz, 2H), 7.50 (t, *J* = 7.6 Hz, 2H), 7.42 (t, *J* = 7.6 Hz, 1H), 6.74 (t, *J* = 5.2 Hz, 1H), 3.87 (t, *J* = 4.4 Hz, 4H), 3.38 (t, *J* = 4.8 Hz, 4H); <sup>13</sup>C{<sup>1</sup>H} NMR (100 MHz, CDCl<sub>3</sub>): δ 151.0, 150.7, 146.4, 133.0, 130.2, 128.8, 128.7, 126.4, 102.9, 95.7, 66.3, 49.0; HRMS (ESI-TOF) *m/z*: [M + H]<sup>+</sup> Calcd for C<sub>16</sub>H<sub>16</sub>N<sub>4</sub>O: 281.1397; found: 281.1393.

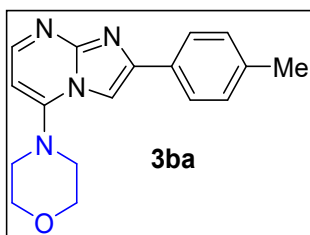

**4-(2-(p-tolyl)imidazo[1,2-a]pyrimidin-5-yl)morpholine (3ba):** Light yellow solid (80%, 59 mg);  $R_f = 0.60$  (DCM/MeOH = 96 : 4); M.p. 147-149 °C;  $^1\text{H NMR}$  (400 MHz, DMSO- $d_6$ ):  $\delta$  8.47 (d,  $J = 4.8$  Hz, 1H), 8.25 (s, 1H), 8.00 (d,  $J = 7.6$  Hz, 2H), 7.30 (d,  $J = 8.0$  Hz, 2H), 6.68 (d,  $J = 4.8$  Hz, 1H), 3.87 (t,  $J = 4.4$  Hz, 4H), 3.36 (t,  $J = 4.0$  Hz, 4H);  $^{13}\text{C}\{^1\text{H}\}$  NMR (100 MHz, DMSO- $d_6$ ):  $\delta$  150.9, 150.7, 150.0, 144.7, 137.5, 130.7, 129.2, 125.9, 104.0, 95.5, 65.7, 48.4, 20.9; HRMS (ESI-TOF)  $m/z$ :  $[\text{M} + \text{H}]^+$  Calcd for  $\text{C}_{17}\text{H}_{18}\text{N}_4\text{O}$ : 295.1553; found: 295.1562.

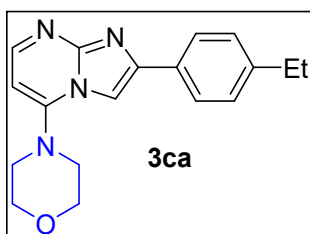

**4-(2-(4-ethylphenyl)imidazo[1,2-a]pyrimidin-5-yl)morpholine (3ca):** Light yellow solid (77%, 59 mg);  $R_f = 0.60$  (DCM/MeOH = 96 : 4); M.p. 152-154 °C;  $^1\text{H NMR}$  (400 MHz, DMSO- $d_6$ ):  $\delta$  8.39 (d,  $J = 4.8$  Hz, 1H), 8.19 (s, 1H), 8.02 (d,  $J = 8.0$  Hz, 2H), 7.29 (d,  $J = 8.0$  Hz, 2H), 6.55 (d,  $J = 4.8$  Hz, 1H), 3.87 (t,  $J = 4.4$  Hz, 4H), 3.30 (t,  $J = 4.4$  Hz, 4H), 2.67-2.61 (m, 2H), 1.21 (t,  $J = 7.6$  Hz, 3H);  $^{13}\text{C}\{^1\text{H}\}$  NMR (100 MHz, DMSO- $d_6$ ):  $\delta$  150.9, 150.7, 150.0, 144.5, 143.9, 130.8, 128.0, 126.0, 104.0, 95.5, 65.7, 48.4, 28.0, 15.5; HRMS (ESI-TOF)  $m/z$ :  $[\text{M} + \text{H}]^+$  Calcd for  $\text{C}_{18}\text{H}_{20}\text{N}_4\text{O}$ : 309.1710; found: 309.1719.

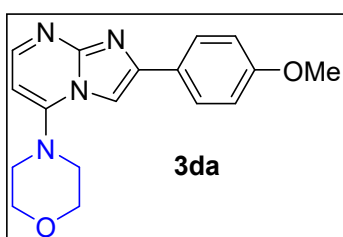

**4-(2-(4-methoxyphenyl)imidazo[1,2-a]pyrimidin-5-yl)morpholine (3da):** Yellow solid (84%, 65 mg);  $R_f = 0.50$  (DCM/MeOH = 96 : 4); M.p. 102-104 °C;  $^1\text{H NMR}$  (400 MHz,  $\text{CDCl}_3$ ):  $\delta$  8.39 (d,  $J = 4.8$  Hz, 1H), 7.95 (d,  $J = 8.8$  Hz, 2H), 7.53 (s, 1H), 6.96 (d,  $J = 8.8$  Hz, 2H), 6.27 (d,  $J = 4.8$  Hz, 1H), 3.97 (t,  $J = 4.8$  Hz, 4H), 3.84 (s, 3H), 3.29 (t,  $J = 4.8$  Hz, 4H);  $^{13}\text{C}\{^1\text{H}\}$  NMR (100 MHz,  $\text{CDCl}_3$ ):  $\delta$  160.0, 150.8, 150.7, 150.6, 146.3, 127.6, 125.8, 114.2, 101.9, 95.5, 66.3, 55.4, 48.8; HRMS (ESI-TOF)  $m/z$ :  $[\text{M} + \text{H}]^+$  Calcd for  $\text{C}_{17}\text{H}_{18}\text{N}_4\text{O}_2$ : 311.1503; found: 311.1495.

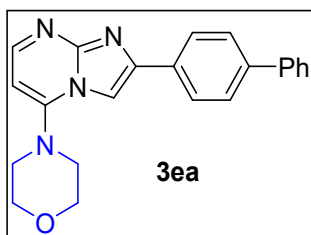

**4-(2-((1,1'-biphenyl)-4-yl)imidazo[1,2-a]pyrimidin-5-yl)morpholine (3ea):** Light yellow solid (82%, 73 mg);  $R_f = 0.60$  (DCM/MeOH = 96 : 4); M.p. 189-191 °C;  $^1\text{H}$  NMR (400 MHz, DMSO- $d_6$ ):  $\delta$  8.42 (d,  $J = 4.8$  Hz, 1H), 8.31 (s, 1H), 8.22 (d,  $J = 8.4$  Hz, 2H), 7.77 (d,  $J = 8.4$  Hz, 2H), 7.74 (d,  $J = 7.6$  Hz, 2H), 7.48 (t,  $J = 8.0$  Hz, 2H), 7.38 (t,  $J = 7.2$  Hz, 1H), 6.56 (d,  $J = 4.8$  Hz, 1H), 3.88 (t,  $J = 4.4$  Hz, 4H), 3.31 (t,  $J = 4.4$  Hz, 4H);  $^{13}\text{C}\{^1\text{H}\}$  NMR (100 MHz, DMSO- $d_6$ ):  $\delta$  151.0, 150.1, 144.0, 139.79, 139.75, 132.5, 129.0, 127.6, 126.9, 126.6, 104.7, 95.7, 65.7, 48.4; HRMS (ESI-TOF)  $m/z$ :  $[\text{M} + \text{H}]^+$  Calcd for  $\text{C}_{22}\text{H}_{20}\text{N}_4\text{O}$ : 357.1710; found: 357.1691.

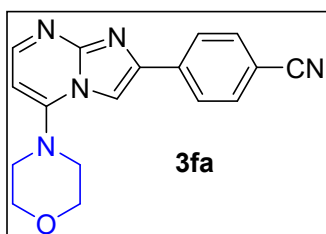

**4-(5-morpholinoimidazo[1,2-a]pyrimidin-2-yl)benzonitrile (3fa):** Light yellow solid (71%, 54 mg);  $R_f = 0.50$  (DCM/MeOH = 96 : 4); M.p. 186-188 °C;  $^1\text{H}$  NMR (400 MHz, DMSO- $d_6$ ):  $\delta$  8.46 (s, 1H), 8.44 (s, 1H), 8.31 (d,  $J = 8.4$  Hz, 2H), 7.92 (d,  $J = 8.4$  Hz, 2H), 6.58 (d,  $J = 4.8$  Hz, 1H), 3.87 (s, 4H), 3.31 (s, 4H);  $^{13}\text{C}\{^1\text{H}\}$  NMR (100 MHz, DMSO- $d_6$ ):  $\delta$  152.0, 151.4, 150.3, 142.4, 138.0, 132.7, 126.6, 119.1, 110.3, 106.7, 96.0, 65.7, 48.6; HRMS (ESI-TOF)  $m/z$ :  $[\text{M} + \text{H}]^+$  Calcd for  $\text{C}_{17}\text{H}_{15}\text{N}_5\text{O}$ : 306.1349; found: 306.1320.

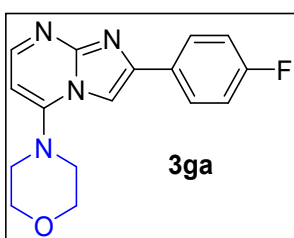

**4-(2-(4-fluorophenyl)imidazo[1,2-a]pyrimidin-5-yl)morpholine (3ga):** Yellow solid (76%, 57 mg);  $R_f = 0.50$  (DCM/MeOH = 96 : 4); M.p. 100-102 °C;  $^1\text{H}$  NMR (400 MHz, DMSO- $d_6$ ):  $\delta$  8.40 (d,  $J = 4.8$  Hz, 1H), 8.22 (s, 1H), 8.17-8.14 (m, 2H), 7.29 (t,  $J = 8.8$  Hz, 2H), 6.55 (d,  $J = 5.2$  Hz, 1H), 3.87 (t,  $J = 4.8$  Hz, 4H), 3.29 (t,  $J = 4.4$  Hz, 4H);  $^{13}\text{C}\{^1\text{H}\}$  NMR (100 MHz, DMSO- $d_6$ ):  $\delta$  162.2 (d,  $J_{\text{C-F}} = 244.0$  Hz), 151.0 (d,  $J_{\text{C-F}} = 5$  Hz), 150.1, 143.6, 130.0 (d,  $J_{\text{C-F}} = 3$  Hz), 128.0 (d,  $J_{\text{C-F}} = 9$  Hz), 115.5 (d,  $J_{\text{C-F}} = 21$  Hz), 104.3, 95.6, 65.7, 48.4;  $^{19}\text{F}$  NMR (376 MHz, DMSO- $d_6$ ):  $\delta$  -113.8; HRMS (ESI-TOF)  $m/z$ :  $[\text{M} + \text{H}]^+$  Calcd for  $\text{C}_{16}\text{H}_{15}\text{FN}_4\text{O}$ : 299.1303; found: 299.1313.

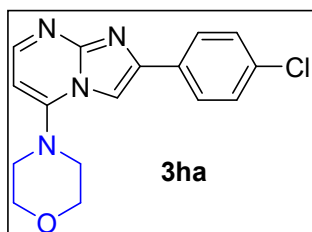

**4-(2-(4-chlorophenyl)imidazo[1,2-a]pyrimidin-5-yl)morpholine (3ha):** Yellow solid (74%, 58 mg);  $R_f = 0.50$  (DCM/MeOH = 96 : 4); M.p. 139-141 °C;  $^1\text{H NMR}$  (400 MHz,  $\text{CDCl}_3$ ):  $\delta$  8.45 (d,  $J = 6.0$  Hz, 1H), 7.97 (d,  $J = 8.4$  Hz, 2H), 7.63 (s, 1H), 7.40 (d,  $J = 8.8$  Hz, 2H), 6.32 (d,  $J = 4.8$  Hz, 1H), 3.99 (t,  $J = 4.8$  Hz, 4H), 3.31 (t,  $J = 4.8$  Hz, 4H);  $^{13}\text{C}\{^1\text{H}\}$  NMR (100 MHz,  $\text{CDCl}_3$ ):  $\delta$  151.2, 151.0, 150.7, 145.2, 134.4, 131.7, 129.0, 127.6, 103.0, 95.8, 66.3, 48.9; HRMS (ESI-TOF)  $m/z$ :  $[\text{M} + \text{H}]^+$  Calcd for  $\text{C}_{16}\text{H}_{15}\text{ClN}_4\text{O}$ : 315.1007; found: 315.0982.

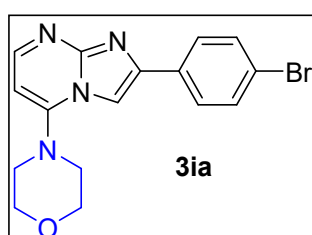

**4-(2-(4-bromophenyl)imidazo[1,2-a]pyrimidin-5-yl)morpholine (3ia):** Yellow solid (74%, 66 mg);  $R_f = 0.50$  (DCM/MeOH = 96 : 4); M.p. 160-162 °C;  $^1\text{H NMR}$  (400 MHz,  $\text{DMSO-}d_6$ ):  $\delta$  8.47 (d,  $J = 5.2$  Hz, 1H), 8.34 (s, 1H), 8.07 (d,  $J = 8.4$  Hz, 2H), 7.68 (d,  $J = 8.4$  Hz, 2H), 6.66 (d,  $J = 5.2$  Hz, 1H), 3.87 (t,  $J = 4.4$  Hz, 4H), 3.35 (t,  $J = 4.4$  Hz, 4H);  $^{13}\text{C}\{^1\text{H}\}$  NMR (100 MHz,  $\text{DMSO-}d_6$ ):  $\delta$  152.1, 151.3, 149.3, 141.4, 131.7, 131.3, 128.1, 121.8, 105.4, 96.6, 65.6, 48.5; HRMS (ESI-TOF)  $m/z$ :  $[\text{M} + \text{H}]^+$  Calcd for  $\text{C}_{16}\text{H}_{15}\text{BrN}_4\text{O}$ : 359.0502; found: 359.0485.

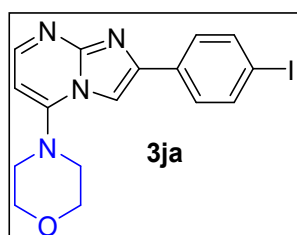

**4-(2-(4-iodophenyl)imidazo[1,2-a]pyrimidin-5-yl)morpholine (3ja):** Light yellow solid (72%, 73 mg);  $R_f = 0.60$  (DCM/MeOH = 96 : 4); M.p. 182-184 °C;  $^1\text{H NMR}$  (400 MHz,  $\text{DMSO-}d_6$ ):  $\delta$  8.41 (d,  $J = 4.8$  Hz, 1H), 8.29 (s, 1H), 7.93 (d,  $J = 8.4$  Hz, 2H), 7.81 (d,  $J = 8.4$  Hz, 2H), 6.55 (d,  $J = 4.8$  Hz, 1H), 3.87 (t,  $J = 4.4$  Hz, 4H), 3.29 (t,  $J = 4.4$  Hz, 4H);  $^{13}\text{C}\{^1\text{H}\}$  NMR (100 MHz,  $\text{DMSO-}d_6$ ):  $\delta$  151.14, 151.10, 150.1, 143.6, 137.3, 133.1, 128.0, 104.8, 95.6, 94.2, 65.7, 48.4; HRMS (ESI-TOF)  $m/z$ :  $[\text{M} + \text{H}]^+$  Calcd for  $\text{C}_{16}\text{H}_{15}\text{IN}_4\text{O}$ : 407.0363; found: 407.0352.

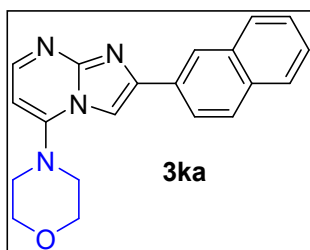

**4-(2-(naphthalen-2-yl)imidazo[1,2-a]pyrimidin-5-yl)morpholine (3ka):** Light yellow solid (81%, 67 mg);  $R_f = 0.60$  (DCM/MeOH = 96 : 4); M.p. 188-190 °C;  $^1\text{H}$  NMR (400 MHz, DMSO- $d_6$ ):  $\delta$  8.66 (s, 1H), 8.45 (d,  $J = 5.2$  Hz, 1H), 8.39 (s, 1H), 8.30-8.27 (m, 1H), 8.01-7.99 (m, 2H), 7.94 (d,  $J = 7.6$  Hz, 1H), 7.56-7.50 (m, 2H), 6.59 (d,  $J = 4.8$  Hz, 1H), 3.90 (t,  $J = 4.4$  Hz, 4H), 3.34 (t,  $J = 4.4$  Hz, 4H);  $^{13}\text{C}\{^1\text{H}\}$  NMR (100 MHz, DMSO- $d_6$ ):  $\delta$  151.3, 151.1, 150.1, 144.0, 133.2, 132.9, 130.6, 128.2, 128.1, 127.7, 126.5, 126.2, 124.5, 124.3, 105.1, 95.8, 65.7, 48.5; HRMS (ESI-TOF)  $m/z$ :  $[\text{M} + \text{H}]^+$  Calcd for  $\text{C}_{20}\text{H}_{18}\text{N}_4\text{O}$ : 331.1553; found: 331.1531.

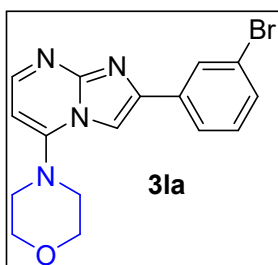

**4-(2-(2-bromophenyl)imidazo[1,2-a]pyrimidin-5-yl)morpholine (3la):** Light yellow solid (73%, 65 mg); M.p. 101-103 °C;  $R_f = 0.50$  (DCM/MeOH = 96 : 4);  $^1\text{H}$  NMR (400 MHz, DMSO- $d_6$ ):  $\delta$  8.44 (d,  $J = 5.2$  Hz, 1H), 8.36 (s, 1H), 8.32 (s, 1H), 8.13 (d,  $J = 7.6$  Hz, 1H), 7.54 (d,  $J = 8.0$  Hz, 1H), 7.43 (t,  $J = 8.0$  Hz, 1H), 6.59 (d,  $J = 5.2$  Hz, 1H), 3.88 (t,  $J = 4.4$  Hz, 4H), 3.31 (t,  $J = 4.4$  Hz, 4H);  $^{13}\text{C}\{^1\text{H}\}$  NMR (100 MHz, DMSO- $d_6$ ):  $\delta$  151.6, 151.3, 149.9, 142.3, 135.5, 130.98, 130.93, 128.4, 125.0, 122.2, 105.5, 96.0, 65.7, 48.5; HRMS (ESI-TOF)  $m/z$ :  $[\text{M} + \text{H}]^+$  Calcd for  $\text{C}_{16}\text{H}_{15}\text{BrN}_4\text{O}$ : 359.0502; found: 359.0482.

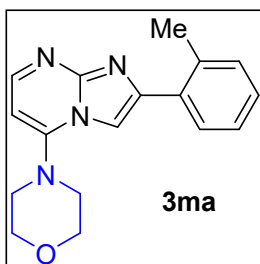

**4-(2-(o-tolyl)imidazo[1,2-a]pyrimidin-5-yl)morpholine (3ma):** Light yellow solid (81%, 60 mg);  $R_f = 0.60$  (DCM/MeOH = 96 : 4); M.p. 100-102 °C;  $^1\text{H}$  NMR (400 MHz, DMSO- $d_6$ ):  $\delta$  8.43 (d,  $J = 5.2$  Hz, 1H), 7.88 (s, 1H), 7.82 (t,  $J = 5.2$  Hz, 1H), 7.30-7.27 (m, 3H), 6.57 (d,  $J = 4.8$  Hz, 1H), 3.84 (t,  $J = 4.4$  Hz, 4H), 3.30 (t,  $J = 4.0$  Hz, 4H), 2.55 (s, 1H);  $^{13}\text{C}\{^1\text{H}\}$  NMR (100 MHz, DMSO- $d_6$ ):  $\delta$  150.9, 149.4, 145.0, 135.9, 133.0, 131.0, 129.7, 128.0, 125.9, 106.5, 95.5, 65.7, 48.5, 21.4; HRMS (ESI-TOF)  $m/z$ :  $[\text{M} + \text{H}]^+$  Calcd for  $\text{C}_{17}\text{H}_{18}\text{N}_4\text{O}$ : 295.1553; found: 295.1534.

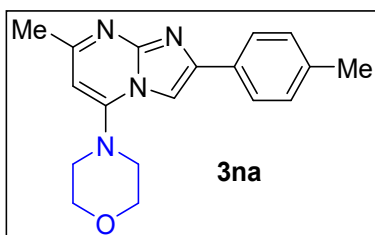

**4-(7-methyl-2-(p-tolyl)imidazo[1,2-a]pyrimidin-5-yl)morpholine (3na):** Light yellow solid (78%, 60 mg);  $R_f = 0.50$  (DCM/MeOH = 98 : 2); M.p. 174-176 °C;  $^1\text{H}$  NMR (400 MHz, DMSO- $d_6$ ):  $\delta$  8.07 (s, 1H), 7.96 (d,  $J = 7.6$  Hz, 2H), 7.24 (d,  $J = 8.0$  Hz, 2H), 6.43 (s, 1H), 3.85 (t,  $J = 4.4$  Hz, 4H), 3.25 (t,  $J = 4.4$  Hz, 4H), 2.47 (s, 3H), 2.32 (s, 3H);  $^{13}\text{C}\{^1\text{H}\}$  NMR (100 MHz, DMSO- $d_6$ ):  $\delta$  160.2, 150.5, 149.9, 144.2, 137.3, 130.9, 129.2, 125.8, 103.5, 95.8, 65.7, 48.5, 24.6, 20.9; HRMS (ESI-TOF)  $m/z$ :  $[\text{M} + \text{H}]^+$  Calcd for  $\text{C}_{18}\text{H}_{20}\text{N}_4\text{O}$ : 309.1710; found: 309.1691.

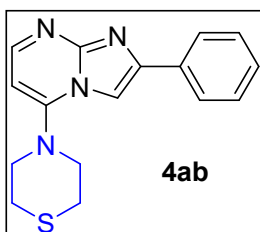

**4-(2-phenylimidazo[1,2-a]pyrimidin-5-yl)thiomorpholine (4ab):** Yellow solid (77%, 57 mg);  $R_f = 0.60$  (DCM/MeOH = 98 : 3); M.p. 108-110 °C;  $^1\text{H}$  NMR (400 MHz, DMSO- $d_6$ ):  $\delta$  8.40 (d,  $J = 4.8$  Hz, 1H), 8.10 (d,  $J = 7.2$  Hz, 2H), 8.08 (s, 1H), 7.45 (t,  $J = 8.0$  Hz, 2H), 7.34 (t,  $J = 7.6$  Hz, 1H), 6.57 (d,  $J = 5.2$  Hz, 1H), 3.51 (t,  $J = 4.8$  Hz, 4H), 2.91 (t,  $J = 4.8$  Hz, 4H);  $^{13}\text{C}\{^1\text{H}\}$  NMR (100 MHz, DMSO- $d_6$ ):  $\delta$  151.5, 151.1, 150.1, 144.5, 133.4, 128.7, 128.3, 126.1, 104.2, 96.6, 50.8, 26.4; HRMS (ESI-TOF)  $m/z$ :  $[\text{M} + \text{H}]^+$  Calcd for  $\text{C}_{16}\text{H}_{16}\text{N}_4\text{S}$ : 297.1168; found: 297.1137.

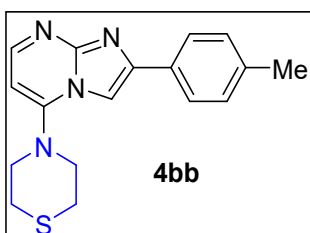

**4-(2-(p-tolyl)imidazo[1,2-a]pyrimidin-5-yl)thiomorpholine (4bb):** Yellow solid (78%, 60 mg);  $R_f = 0.60$  (DCM/MeOH = 97 : 3); M.p. 144-146 °C;  $^1\text{H}$  NMR (400 MHz, DMSO- $d_6$ ):  $\delta$  8.41 (d,  $J = 4.8$  Hz, 1H), 8.06 (s, 1H), 8.00 (d,  $J = 8.0$  Hz, 2H), 7.27 (d,  $J = 8.0$  Hz, 2H), 6.60 (d,  $J = 4.8$  Hz, 1H), 3.52 (t,  $J = 4.8$  Hz, 4H), 2.92 (t,  $J = 4.8$  Hz, 4H);  $^{13}\text{C}\{^1\text{H}\}$  NMR (100 MHz, DMSO- $d_6$ ):  $\delta$  151.4, 151.1, 149.7, 143.9, 137.7, 130.1, 129.2, 125.9, 103.8, 96.8, 50.7, 26.3, 20.9; HRMS (ESI-TOF)  $m/z$ :  $[\text{M} + \text{H}]^+$  Calcd for  $\text{C}_{17}\text{H}_{18}\text{N}_4\text{S}$ : 311.1325; found: 311.1298.

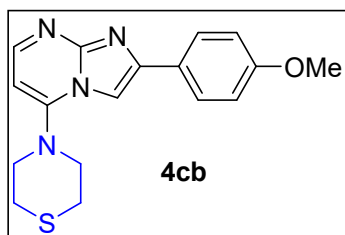

**4-(2-(4-methoxyphenyl)imidazo[1,2-a]pyrimidin-5-yl)thiomorpholine (4cb):** Yellow solid (82%, 67 mg);  $R_f = 0.50$  (DCM/MeOH = 97 : 3); M.p. 103-105 °C;  $^1\text{H}$  NMR (400 MHz, DMSO- $d_6$ ):  $\delta$  8.38 (d,  $J = 4.8$  Hz, 1H), 8.04 (d,  $J = 8.8$  Hz, 2H), 7.99 (s, 1H), 7.01 (d,  $J = 8.8$  Hz, 2H), 6.56 (d,  $J = 4.8$  Hz, 1H), 3.80 (s, 3H), 3.50 (t,  $J = 5.2$  Hz, 4H), 2.91 (t,  $J = 4.8$  Hz, 4H);  $^{13}\text{C}\{^1\text{H}\}$  NMR (100 MHz, DMSO- $d_6$ ):  $\delta$  159.4, 151.3, 150.6, 150.0, 144.5, 127.4, 125.9, 114.1, 103.1, 96.5, 55.2, 50.7, 26.4; HRMS (ESI-TOF)  $m/z$ :  $[\text{M} + \text{H}]^+$  Calcd for  $\text{C}_{17}\text{H}_{18}\text{N}_4\text{OS}$ : 327.1274; found: 327.1257.

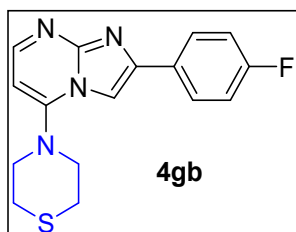

**4-(2-(4-fluorophenyl)imidazo[1,2-a]pyrimidin-5-yl)thiomorpholine (4gb):** Yellow solid (72%, 56 mg);  $R_f = 0.50$  (DCM/MeOH = 97 : 3); M.p. 183-185 °C;  $^1\text{H}$  NMR (400 MHz, DMSO- $d_6$ ):  $\delta$  8.46 (d,  $J = 5.2$  Hz, 1H), 8.17-8.15 (m, 2H), 8.13 (s, 1H), 7.34-7.30 (m, 2H), 6.68 (d,  $J = 5.2$  Hz, 1H), 3.54 (s, 4H), 2.91 (t,  $J = 4.4$  Hz, 4H);  $^{13}\text{C}\{^1\text{H}\}$  NMR (100 MHz, DMSO- $d_6$ ):  $\delta$  162.4 (d,  $J_{\text{C-F}} = 243$  Hz), 152.0, 151.7, 149.3, 141.6, 128.6, 128.3 (d,  $J_{\text{C-F}} = 9$  Hz), 115.7 (d,  $J_{\text{C-F}} = 22$  Hz), 104.6, 97.6, 50.8, 26.3;  $^{19}\text{F}$  NMR (376 MHz,  $\text{CDCl}_3$ ):  $\delta$  -112.5; HRMS (ESI-TOF)  $m/z$ :  $[\text{M} + \text{H}]^+$  Calcd for  $\text{C}_{16}\text{H}_{15}\text{FN}_4\text{S}$ : 315.1074; found: 315.1056.

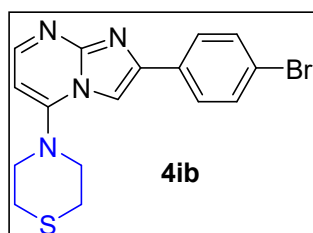

**4-(2-(4-bromophenyl)imidazo[1,2-a]pyrimidin-5-yl)thiomorpholine (4ib):** Yellow solid (71%, 67 mg); M.p. 200-202 °C  $R_f = 0.50$  (DCM/MeOH = 97 : 3);  $^1\text{H}$  NMR (400 MHz, DMSO- $d_6$ ):  $\delta$  8.59 (d,  $J = 5.6$  Hz, 1H), 8.27 (s, 1H), 7.99 (d,  $J = 8.4$  Hz, 2H), 7.74 (d,  $J = 8.8$  Hz, 2H), 6.94 (d,  $J = 5.6$  Hz, 1H), 3.69 (s, 4H), 2.89 (s, 4H);  $^{13}\text{C}\{^1\text{H}\}$  NMR (100 MHz, DMSO- $d_6$ ):  $\delta$  155.2, 152.6, 147.6, 136.3, 132.5, 128.8, 127.6, 123.8, 106.8, 100.7, 51.4, 26.4; HRMS (ESI-TOF)  $m/z$ :  $[\text{M} + \text{H}]^+$  Calcd for  $\text{C}_{16}\text{H}_{15}\text{BrN}_4\text{S}$ : 375.0274; found: 375.0246.

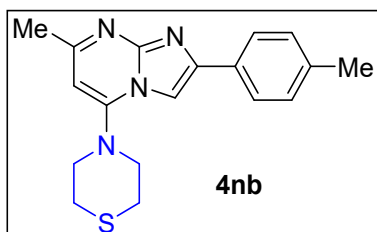

**4-(2-(4-bromophenyl)imidazo[1,2-a]pyrimidin-5-yl)thiomorpholine (4nb):** Yellow solid (76%, 62 mg);  $R_f = 0.60$  (DCM/MeOH = 97 : 3); M.p. 194-196 °C;  $^1\text{H NMR}$  (400 MHz, DMSO- $d_6$ ):  $\delta$  8.17 (s, 1H), 7.96 (d,  $J = 8.0$  Hz, 1H), 7.34 (d,  $J = 8.0$  Hz, 2H), 6.93 (s, 1H), 3.62 (s, 4H), 2.91 (s, 4H), 2.57 (s, 3H), 2.36 (s, 3H);  $^{13}\text{C}\{^1\text{H}\}$  NMR (100 MHz, DMSO- $d_6$ ):  $\delta$  165.6, 151.6, 146.8, 139.7, 136.2, 129.8, 126.3, 125.2, 105.2, 100.7, 51.1, 26.2, 24.6, 21.1; HRMS (ESI-TOF)  $m/z$ :  $[\text{M} + \text{H}]^+$  Calcd for  $\text{C}_{18}\text{H}_{20}\text{N}_4\text{S}$ : 325.1481; found: 325.1448.

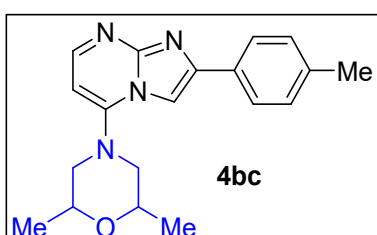

**2,6-dimethyl-4-(2-(p-tolyl)imidazo[1,2-a]pyrimidin-5-yl)morpholine (4bc):** Light yellow solid (75%, 60 mg);  $R_f = 0.50$  (DCM/MeOH = 96 : 4); M.p. 90-92 °C;  $^1\text{H NMR}$  (400 MHz, DMSO- $d_6$ ):  $\delta$  8.35 (d,  $J = 5.2$  Hz, 1H), 8.16 (s, 1H), 8.00 (d,  $J = 8.0$  Hz, 2H), 7.25 (d,  $J = 7.6$  Hz, 2H), 6.51 (d,  $J = 4.8$  Hz, 1H), 3.93-3.89 (m, 2H), 3.59-3.56 (m, 2H), 2.60-2.49 (m, 2H), 2.33 (s, 3H), 1.16 (d,  $J = 6.0$  Hz, 6H);  $^{13}\text{C}\{^1\text{H}\}$  NMR (100 MHz, DMSO- $d_6$ ):  $\delta$  150.7, 150.6, 150.1, 144.6, 137.5, 130.7, 129.2, 126.0, 104.0, 95.7, 70.6, 53.2, 21.0, 18.6; HRMS (ESI-TOF)  $m/z$ :  $[\text{M} + \text{H}]^+$  Calcd for  $\text{C}_{19}\text{H}_{22}\text{N}_4\text{O}$ : 323.1866; found: 323.1854.

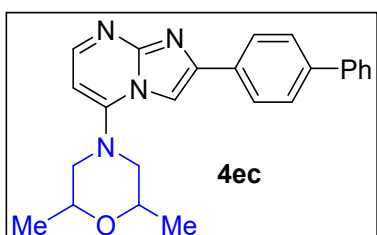

**4-(2-([1,1'-biphenyl]-4-yl)imidazo[1,2-a]pyrimidin-5-yl)-2,6-dimethylmorpholine (4ec):** Light yellow solid (80%, 77 mg);  $R_f = 0.50$  (DCM/MeOH = 96 : 4); M.p. 108-110 °C;  $^1\text{H NMR}$  (400 MHz, DMSO- $d_6$ ):  $\delta$  8.42 (d,  $J = 5.2$  Hz, 1H), 8.32 (s, 1H), 8.22 (d,  $J = 8.0$  Hz, 2H), 7.78 (d,  $J = 8.4$  Hz, 2H), 7.74 (d,  $J = 7.6$  Hz, 2H), 7.48 (t,  $J = 8.0$  Hz, 2H), 7.38 (t,  $J = 7.6$  Hz, 1H), 6.59 (d,  $J = 5.2$  Hz, 1H), 3.94-3.91 (m, 2H), 3.64-3.61 (m, 2H), 2.65-2.60 (m, 2H), 1.18 (d,  $J = 6.0$  Hz, 6H);  $^{13}\text{C}\{^1\text{H}\}$  NMR (100 MHz, DMSO- $d_6$ ):  $\delta$  151.2, 150.8, 150.0, 143.4, 139.9, 139.7, 132.1, 129.0, 127.6, 126.9, 126.7, 126.6, 104.9, 96.2, 70.6, 53.3, 18.7; HRMS (ESI-TOF)  $m/z$ :  $[\text{M} + \text{H}]^+$  Calcd for  $\text{C}_{24}\text{H}_{24}\text{N}_4\text{O}$ : 385.2023; found: 385.2003.

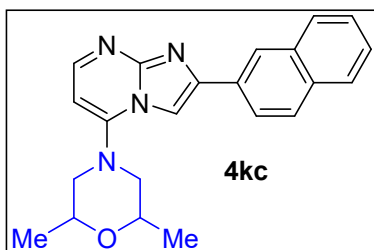

**2,6-dimethyl-4-(2-(naphthalen-2-yl)imidazo[1,2-a]pyrimidin-5-yl)morpholine (4kc):** Light yellow solid (76%, 68 mg);  $R_f = 0.50$  (DCM/MeOH = 96 : 4); M.p. 100-102 °C;  $^1\text{H}$  NMR (400 MHz, DMSO- $d_6$ ):  $\delta$  8.65 (s, 1H), 8.41 (d,  $J = 4.8$  Hz, 1H), 8.35 (s, 1H), 8.29 (d,  $J = 8.8$  Hz, 2H), 8.02-7.97 (m, 2H), 7.93 (d,  $J = 7.6$  Hz, 1H), 7.55-7.49 (m, 2H), 6.56 (d,  $J = 4.8$  Hz, 1H), 3.96-3.93 (m, 2H), 3.63-3.61 (m, 2H), 2.65-2.59 (m, 2H), 1.18 (d,  $J = 6.0$  Hz, 6H);  $^{13}\text{C}\{^1\text{H}\}$  NMR (100 MHz, DMSO- $d_6$ ):  $\delta$  151.1, 150.8, 150.3, 144.4, 133.2, 132.9, 131.0, 128.2, 128.0, 127.7, 126.5, 126.2, 124.6, 124.5, 105.1, 95.9, 70.6, 53.3, 18.7; HRMS (ESI-TOF)  $m/z$ :  $[\text{M} + \text{H}]^+$  Calcd for  $\text{C}_{22}\text{H}_{22}\text{N}_4\text{O}$ : 359.1866; found: 359.1837.

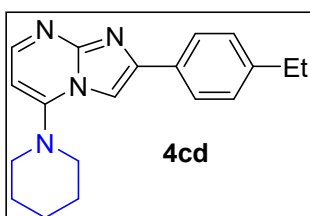

**2,6-dimethyl-4-(2-(naphthalen-2-yl)imidazo[1,2-a]pyrimidin-5-yl)morpholine (4cd):** Light yellow solid (55%, 42 mg);  $R_f = 0.60$  (DCM/MeOH = 96 : 4); M.p. 78-80 °C;  $^1\text{H}$  NMR (400 MHz, DMSO- $d_6$ ):  $\delta$  8.35 (d,  $J = 4.8$  Hz, 1H), 8.01 (s, 1H), 7.99 (s, 2H), 7.28 (d,  $J = 8.0$  Hz, 2H), 6.48 (d,  $J = 5.2$  Hz, 1H), 3.24 (s, 4H), 2.66-2.60 (m, 2H), 1.77 (s, 4H), 1.67-1.66 (m, 2H), 1.20 (t,  $J = 7.6$  Hz, 3H);  $^{13}\text{C}\{^1\text{H}\}$  NMR (100 MHz, DMSO- $d_6$ ):  $\delta$  154.9, 152.2, 146.7, 146.4, 134.9, 128.6, 126.6, 124.3, 106.1, 100.1, 49.8, 28.1, 24.9, 23.4, 15.4; HRMS (ESI-TOF)  $m/z$ :  $[\text{M} + \text{H}]^+$  Calcd for  $\text{C}_{19}\text{H}_{22}\text{N}_4$ : 307.1917; found: 307.1902.

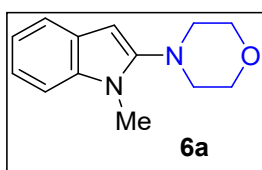

**4-(1-methyl-1H-indol-2-yl)morpholine (6a):**<sup>4</sup> Light yellow solid (76%, 41 mg);  $R_f = 0.40$  (PE : EA = 15 : 75); M.p. 92-94 °C;  $^1\text{H}$  NMR (400 MHz,  $\text{CDCl}_3$ ):  $\delta$  7.51 (d,  $J = 7.6$  Hz, 1H), 7.24 (d,  $J = 8.0$  Hz, 1H), 7.15 (t,  $J = 7.6$  Hz, 1H), 7.09 (t,  $J = 7.6$  Hz, 1H), 5.95 (s, 1H), 3.90 (t,  $J = 4.4$  Hz, 4H), 3.63 (s, 3H), 3.03 (t,  $J = 4.8$  Hz, 4H);  $^{13}\text{C}\{^1\text{H}\}$  NMR (100 MHz,  $\text{CDCl}_3$ ):  $\delta$  150.0, 135.3, 127.5, 120.4, 119.7, 119.5, 108.8, 86.9, 66.9, 52.8, 29.1; HRMS (ESI-TOF)  $m/z$ :  $[\text{M} + \text{H}]^+$  Calcd for  $\text{C}_{14}\text{H}_{10}\text{N}_2\text{O}$ : 217.1335; found: 217.1324.

## 6. References

1. A. Kamal, G. B. Kumar, V. L. Nayak, V. S. Reddy, A. B. Shaik, and M. K. Reddy, *Med. Chem. Commun.*, 2015, **6**, 606–612.
2. (a) D. Xu, B. Liu, and M. Zheng, *J. Chem. Res.*, **2003**(10), 645–647; (b) D. T. Hurst and J. A. Saldanha., *Heterocycles*. 1977, **6**, 929.
3. T. Froehr, C. P. Sindlinger, U. Kloeckner, P. Finkbeiner, and B. J. Nachtsheim., *Org. Lett.* 2011, **13**, 3754–3757.
4. Y. X. Li, K. G. Ji, H. X. Wang, S. Ali, and Y. M. Liang., *J. Org. Chem*, 2011, **76**, 744–747.

## **7. NMR Spectra for the Synthesized Products**

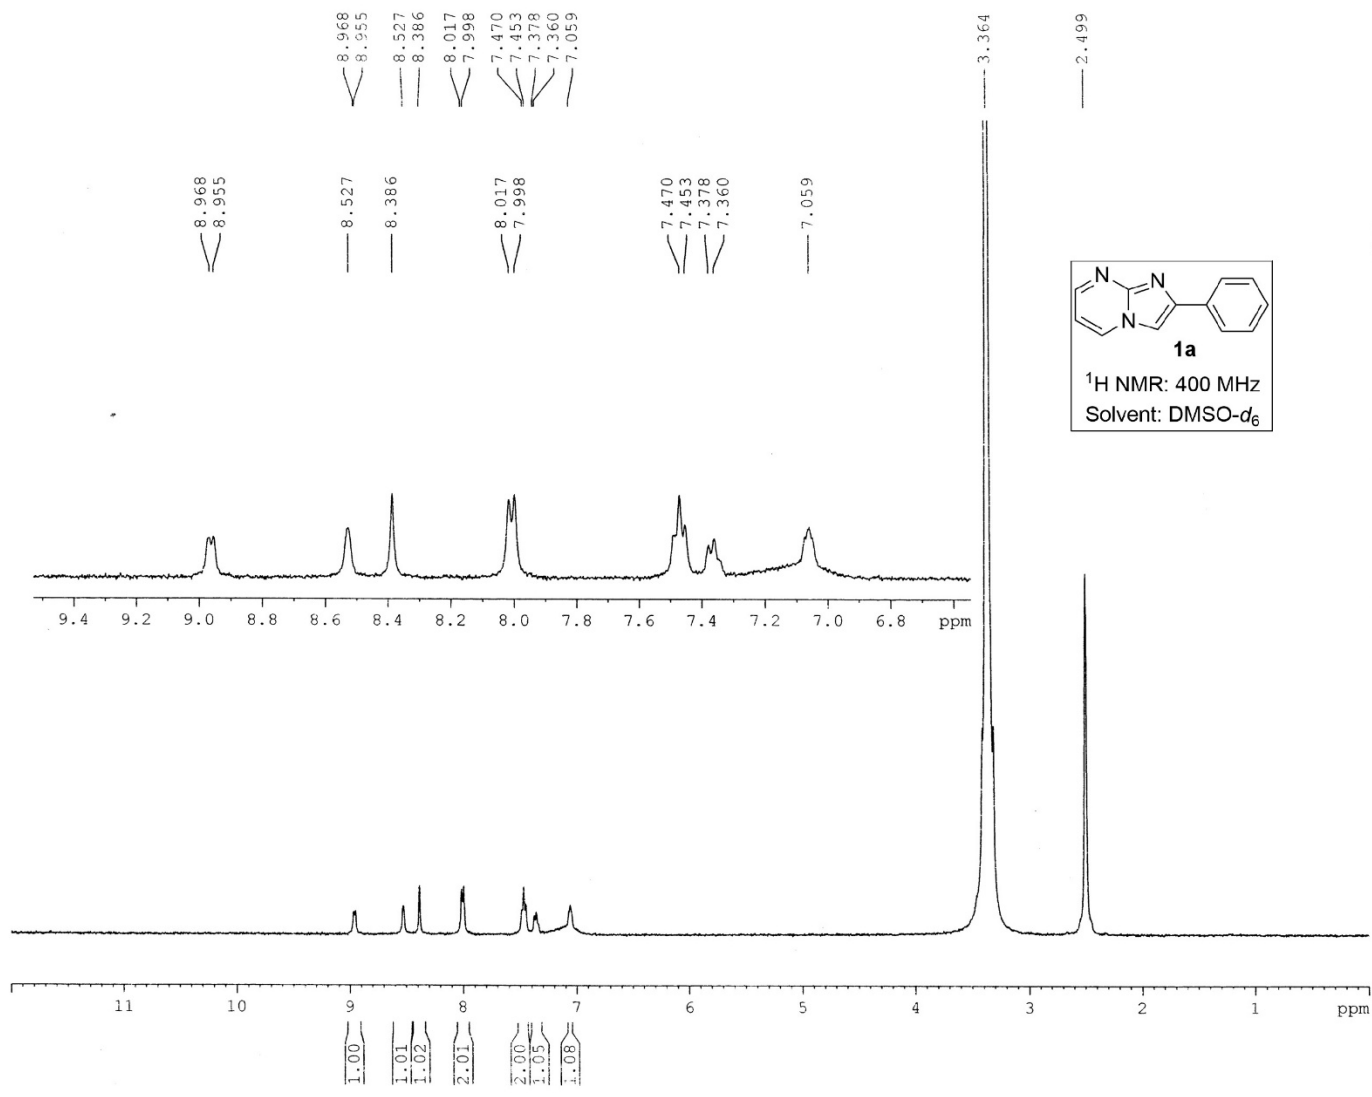

Current Data Parameters  
NAME Dr. A HAJRA 2025 1H  
EXPNO 308  
PROCNO 1

F2 - Acquisition Parameters  
Date\_ 20250607  
Time 17.48  
INSTRUM spect  
PROBHD 5 mm PABBO BB/  
PULPROG zg30  
TD 32768  
SOLVENT DMSO  
NS 8  
DS 2  
SWH 8223.685 Hz  
FIDRES 0.250967 Hz  
AQ 1.9922944 sec  
RG 168.31  
DW 60.800 usec  
DE 6.50 usec  
TE 291.1 K  
D1 1.00000000 sec  
TDO 1

==== CHANNEL f1 =====  
SF01 400.1524711 MHz  
NUC1 1H  
P1 14.75 usec  
PLW1 12.00000000 W

F2 - Processing parameters  
SI 16384  
SF 400.1500029 MHz  
WDW EM  
SSB 0  
LB 0.30 Hz  
GB 0  
PC 1.00

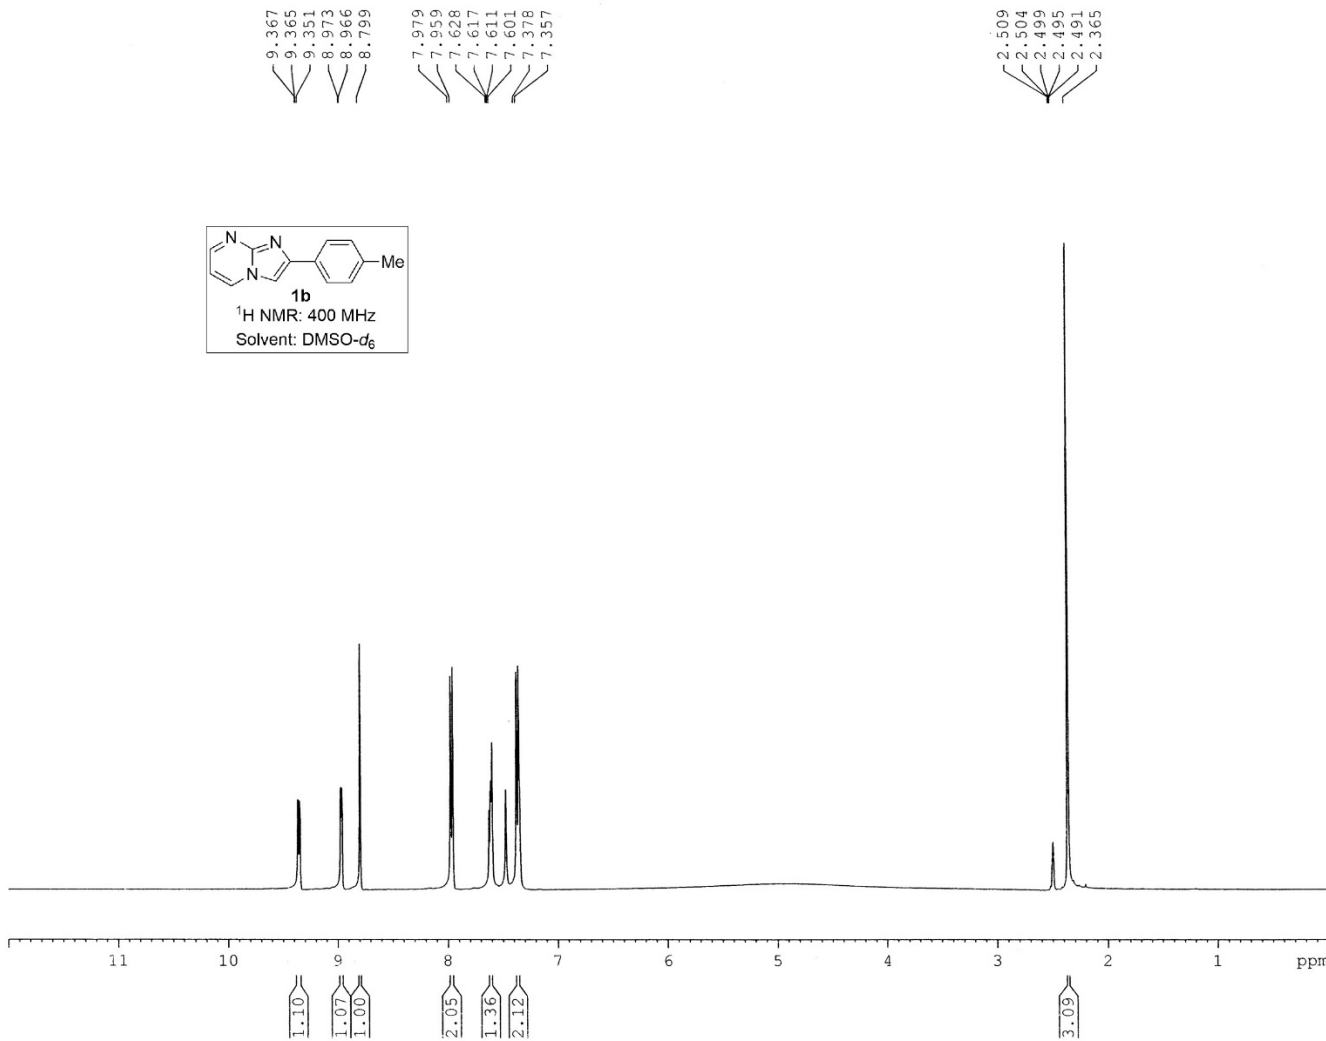

```

Current Data Parameters
NAME      Dr. A HAJRA 2025 1H
EXPNO     113
PROCNO    1

F2 - Acquisition Parameters
Date_     20250216
Time      12.49
INSTRUM   spect
PROBHD    5 mm PABBO BB/
PULPROG   zg30
TD        32768
SOLVENT   DMSO
NS         8
DS         2
SWH        8223.685 Hz
FIDRES     0.250967 Hz
AQ         1.9922944 sec
RG         62.69
DW         60.800 usec
DE         6.50 usec
TE         294.0 K
D1         1.00000000 sec
TD0        1

===== CHANNEL f1 =====
SF01      400.1524711 MHz
NUC1       1H
P1         14.75 usec
PLW1       12.00000000 W

F2 - Processing parameters
SI         16384
SF         400.1500030 MHz
WDW        EM
SSB        0
LB         0.30 Hz
GB         0
PC         1.00
    
```

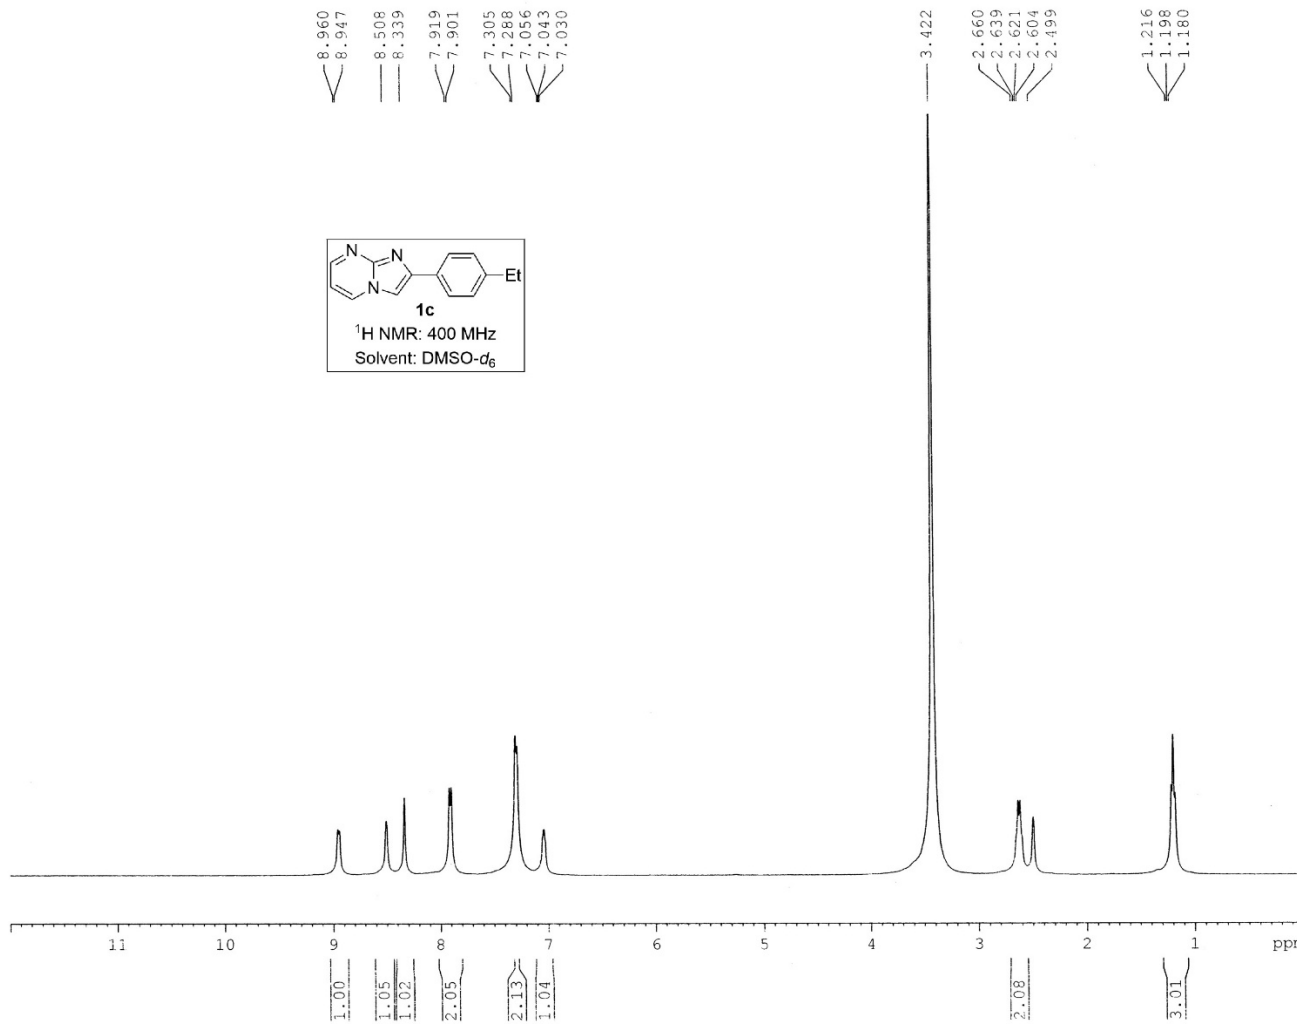

Current Data Parameters  
 NAME Dr. A HAJRA 2026 1H  
 EXPNO 85  
 PROCNO 1

F2 - Acquisition Parameters  
 Date\_ 20260203  
 Time 18.20  
 INSTRUM spect  
 PROBHD 5 mm PABBO BB/  
 PULPROG zg30  
 TD 32768  
 SOLVENT DMSO  
 NS 8  
 DS 2  
 SWH 8223.685 Hz  
 FIDRES 0.250967 Hz  
 AQ 1.9922944 sec  
 RG 67.81  
 DW 60.800 usec  
 DE 6.50 usec  
 TE 289.3 K  
 D1 1.00000000 sec  
 TD0 1

==== CHANNEL f1 =====  
 SFO1 400.1524711 MHz  
 NUC1 1H  
 P1 14.75 usec  
 PLW1 12.00000000 W

F2 - Processing parameters  
 SI 16384  
 SF 400.1500022 MHz  
 WDW EM  
 SSB 0  
 LB 0.30 Hz  
 GB 0  
 PC 1.00

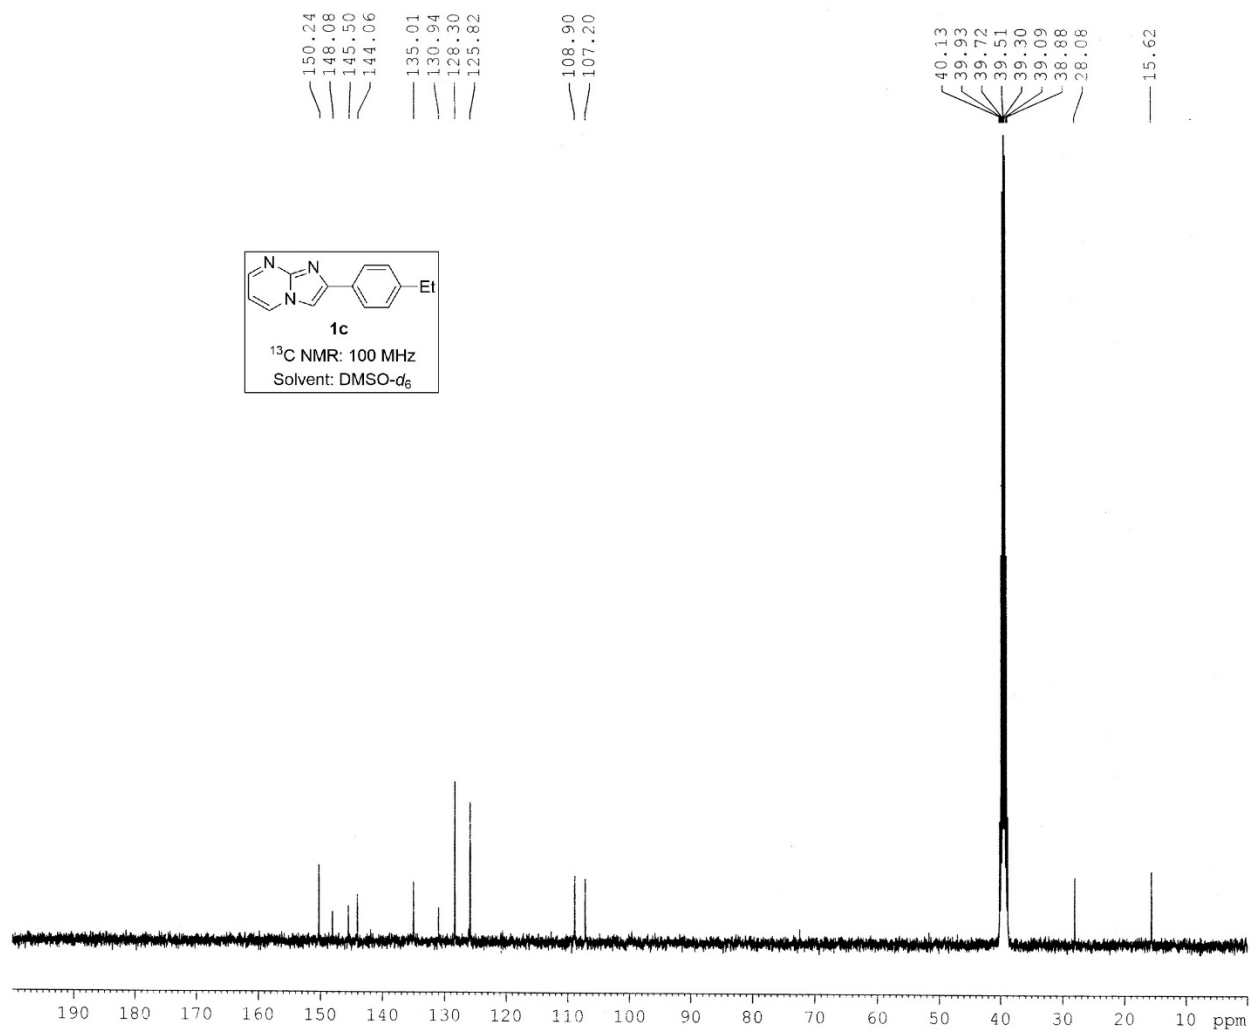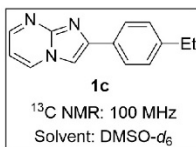

Current Data Parameters  
 NAME Dr. A HAJRA-2026-13C  
 EXPNO 52  
 PROCNO 1

F2 - Acquisition Parameters  
 Date\_ 20260203  
 Time 18.33  
 INSTRUM spect  
 PROBHD 5 mm PABBO BB/  
 PULPROG zgpg30  
 TD 32768  
 SOLVENT DMSO  
 NS 200  
 DS 2  
 SWH 24038.461 Hz  
 FIDRES 0.733596 Hz  
 AQ 0.6815744 sec  
 RG 186.42  
 DW 20.800 usec  
 DE 6.50 usec  
 TE 289.7 K  
 D1 2.0000000 sec  
 D11 0.0300000 sec  
 TD0 1

----- CHANNEL f1 -----  
 SFO1 100.6278588 MHz  
 NUC1 13C  
 P1 8.90 usec  
 PLW1 54.0000000 W

----- CHANNEL f2 -----  
 SFO2 400.1516006 MHz  
 NUC2 1H  
 CPDPRG12 waltz16  
 PCPD2 90.00 usec  
 PLW2 12.0000000 W  
 PLW12 0.32231000 W  
 PLW13 0.16212000 W

F2 - Processing parameters  
 SI 16384  
 SF 100.6178355 MHz  
 WDW EM  
 SSB 0  
 LB 1.00 Hz  
 GB 0  
 PC 1.40

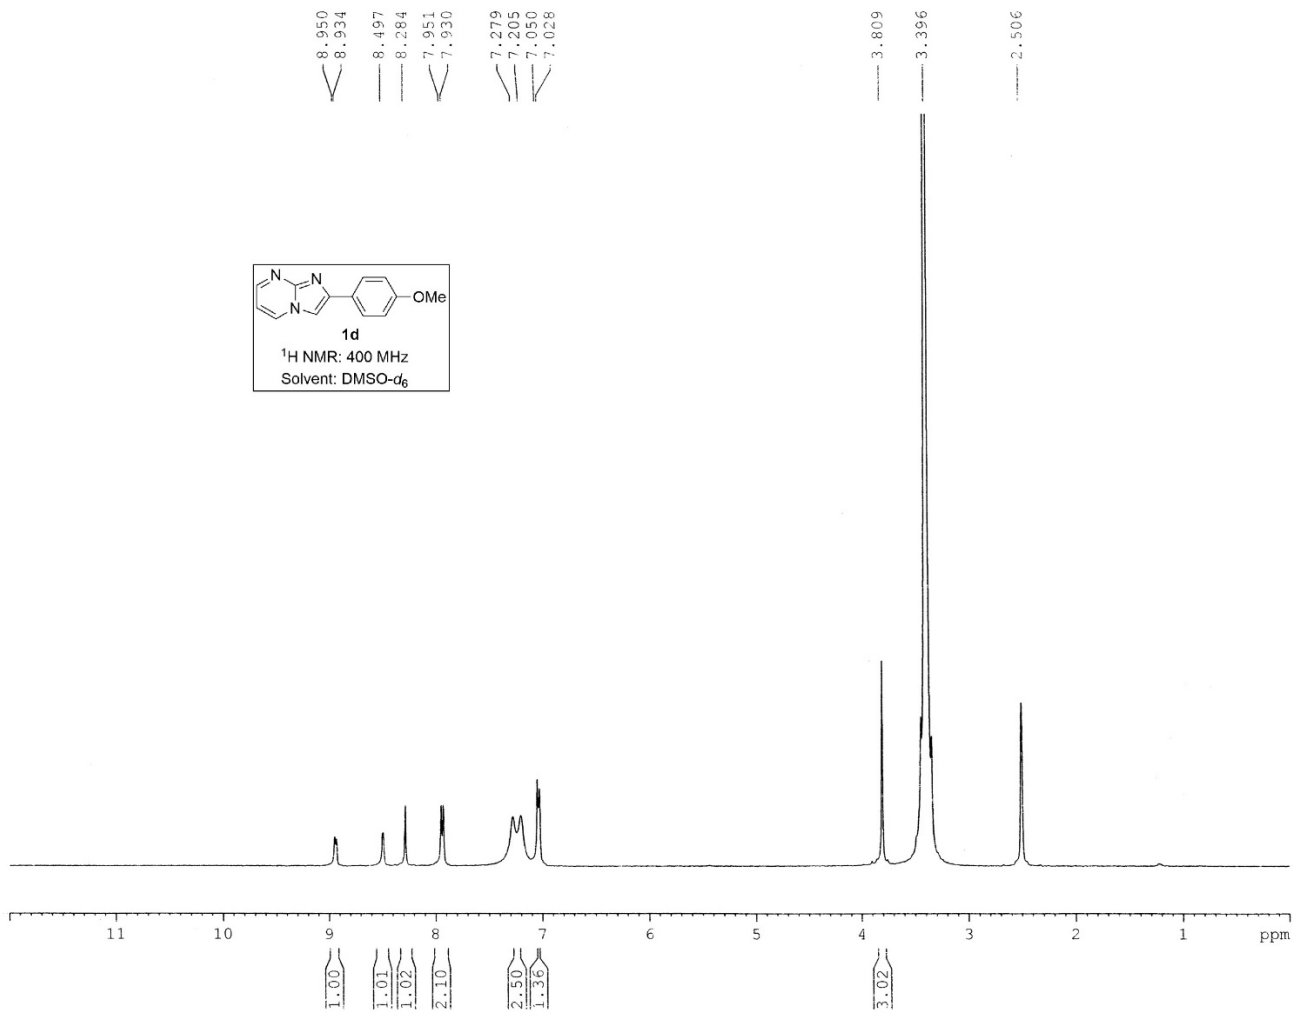

Current Data Parameters  
 NAME Dr. A HAJRA 2025 1H  
 EXPNO 309  
 PROCNO 1

F2 - Acquisition Parameters  
 Date\_ 20250607  
 Time 17.55  
 INSTRUM spect  
 PROBHD 5 mm PABBO BB/  
 PULPROG zg30  
 TD 32768  
 SOLVENT DMSO  
 NS 8  
 DS 2  
 SWH 8223.685 Hz  
 FIDRES 0.250967 Hz  
 AQ 1.9922944 sec  
 RG 168.31  
 DW 60.800 usec  
 DE 6.50 usec  
 TE 291.0 K  
 D1 1.00000000 sec  
 TD0 1

===== CHANNEL f1 =====  
 SFO1 400.1524711 MHz  
 NUC1 1H  
 P1 14.75 usec  
 PLW1 12.00000000 W

F2 - Processing parameters  
 SI 16384  
 SF 400.1500000 MHz  
 WDW EM  
 SSB 0  
 LB 0.30 Hz  
 GB 0  
 PC 1.00

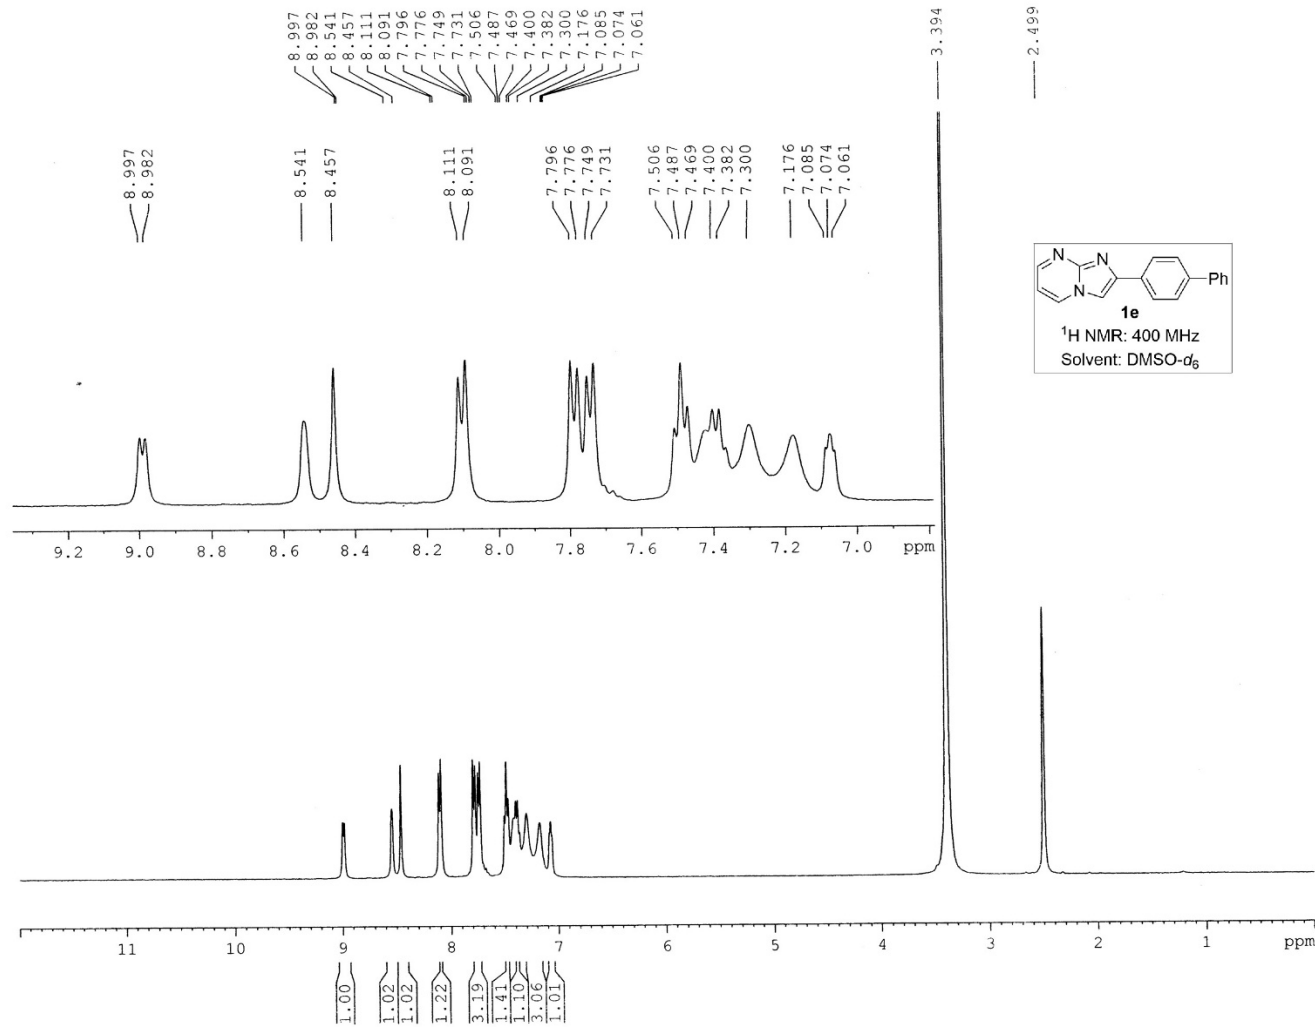

Current Data Parameters  
 NAME Dr. A HAJRA 2026 1H  
 EXPNO 12  
 PROCNO 1

F2 - Acquisition Parameters  
 Date\_ 20260109  
 Time\_ 11.49  
 INSTRUM spect  
 PROBHD 5 mm PABBO BB/  
 PULPROG zg30  
 TD 32768  
 SOLVENT DMSO  
 NS 8  
 DS 2  
 SWH 8223.685 Hz  
 FIDRES 0.250967 Hz  
 AQ 1.9922944 sec  
 RG 148.91  
 DW 60.800 usec  
 DE 6.50 usec  
 TE 288.6 K  
 D1 1.00000000 sec  
 TD0 1

==== CHANNEL f1 =====  
 SF01 400.1524711 MHz  
 NUC1 1H  
 P1 14.75 usec  
 PLW1 12.00000000 W

F2 - Processing parameters  
 SI 16384  
 SF 400.1500024 MHz  
 WDW EM  
 SSB 0  
 LB 0.30 Hz  
 GB 0  
 PC 1.00

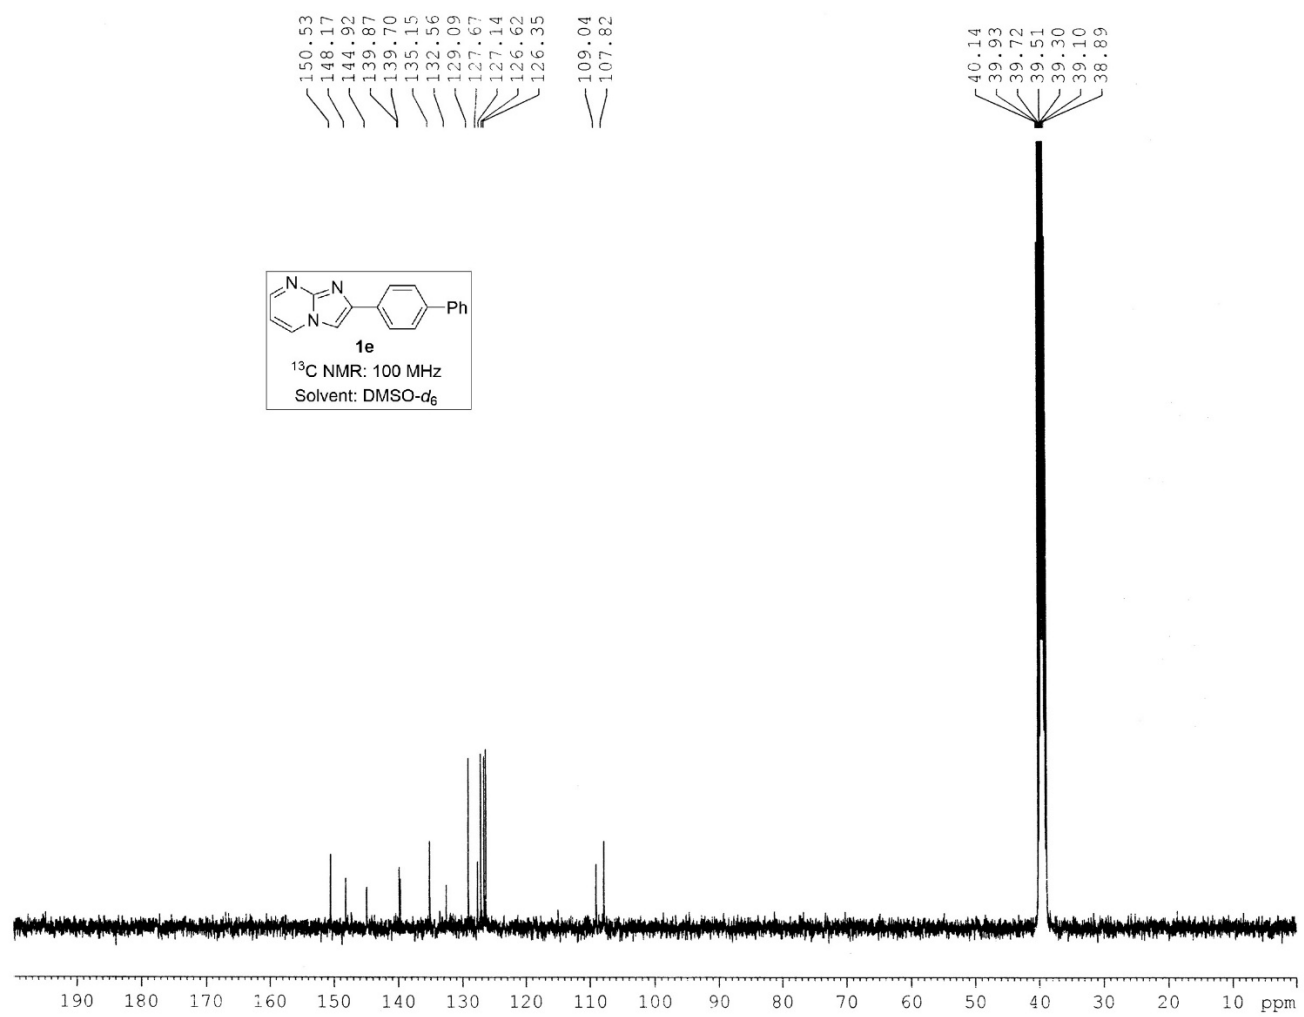

150.53  
148.17  
144.92  
139.87  
139.70  
135.15  
132.56  
129.09  
127.67  
127.14  
126.62  
126.35  
109.04  
107.82

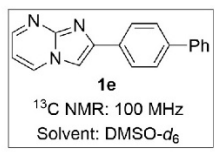

40.14  
39.93  
39.72  
39.51  
39.30  
39.10  
38.89

```

Current Data Parameters
NAME      Dr. A HAJRA-2026-13C
EXPNO    8
PROCNO   1

F2 - Acquisition Parameters
Date_    20260109
Time     12.39
INSTRUM  spect
PROBHD   5 mm PABBO BB/
PULPROG  zgpg30
TD       32768
SOLVENT  DMSO
NS       1000
DS       2
SWH      24038.461 Hz
FIDRES   0.733596 Hz
AQ       0.6815744 sec
RG       186.42
DW       20.800 usec
DE       6.50 usec
TE       288.9 K
D1       2.0000000 sec
d11      0.030000000 sec
TD0      1

===== CHANNEL f1 =====
SFO1     100.6278588 MHz
NUC1     13C
P1       6.90 usec
PLW1     54.00000000 W

===== CHANNEL F2 =====
SFO2     400.1516006 MHz
NUC2     1H
CPDPRG2  waltz16
PCPD2    90.00 usec
PLW2     12.00000000 W
PLW12    0.32231000 W
PLW13    0.16212000 W

F2 - Processing parameters
SI       16384
SF       100.6178368 MHz
WDW      EM
SSB      0
LB       1.00 Hz
GB       0
PC       1.40
    
```

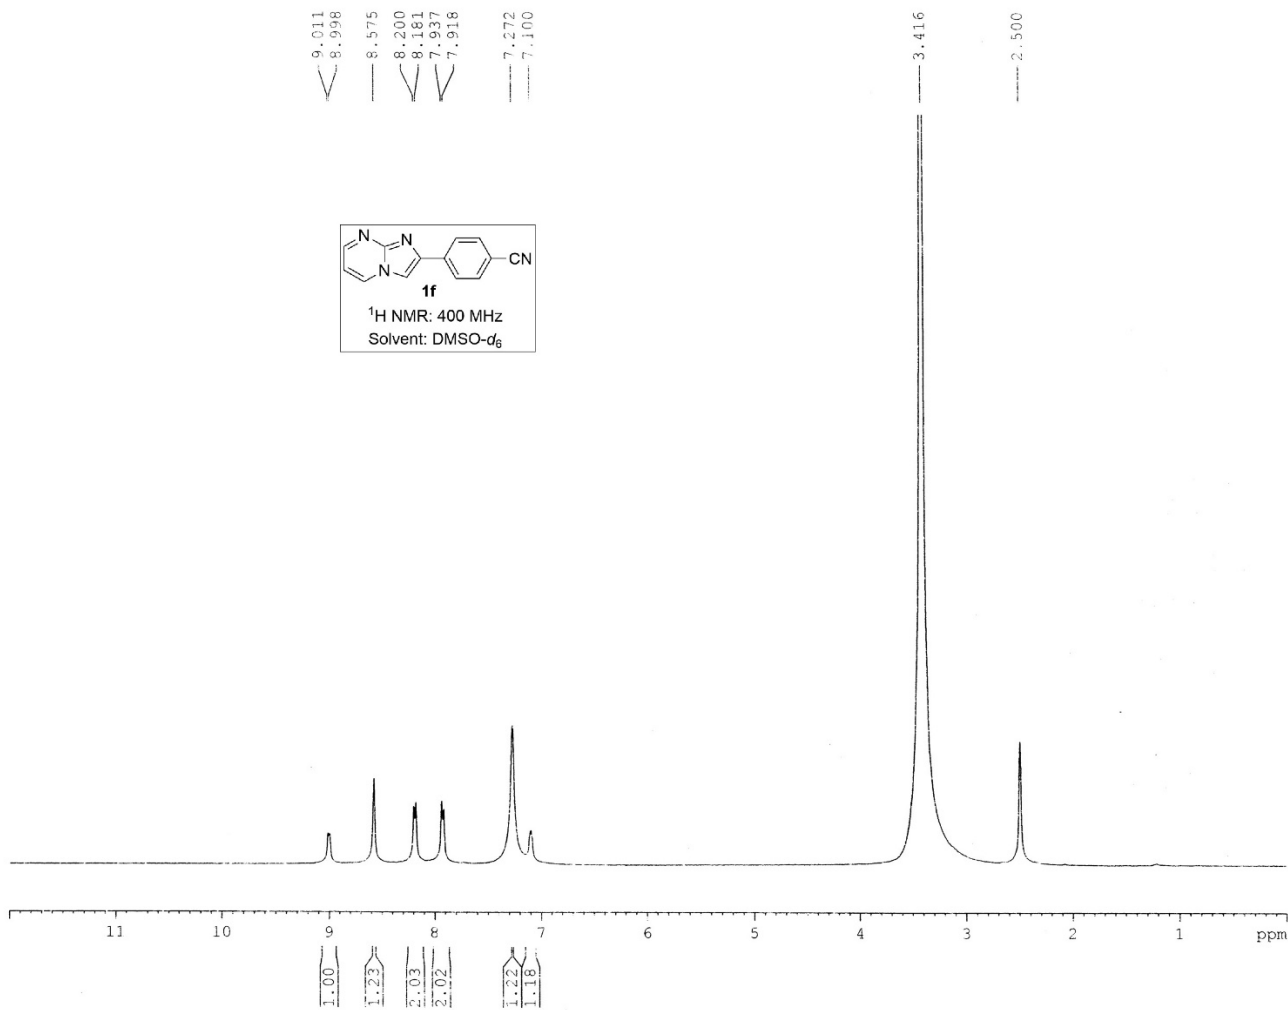

Current Data Parameters  
 NAME Dr. A HAJRA 2026 1H  
 EXPNO 122  
 PROCNO 1

F2 - Acquisition Parameters  
 Date\_ 20260216  
 Time 19.47  
 INSTRUM spect  
 PROBHD 5 mm PABBO BB/  
 PULPROG zg30  
 TD 32768  
 SOLVENT DMSO  
 NS 8  
 DS 2  
 SWH 8223.685 Hz  
 FIDRES 0.250967 Hz  
 AQ 1.9922944 sec  
 RG 87.66  
 DW 60.800 usec  
 DE 6.50 usec  
 TE 291.3 K  
 D1 1.00000000 sec  
 TD0 1

===== CHANNEL f1 =====  
 SFO1 400.1524711 MHz  
 NUC1 <sup>1</sup>H  
 P1 14.75 usec  
 PLW1 12.00000000 W

F2 - Processing parameters  
 SI 16384  
 SF 400.1500033 MHz  
 WDW EM  
 SSB 0  
 LB 0.30 Hz  
 GB 0  
 PC 1.00

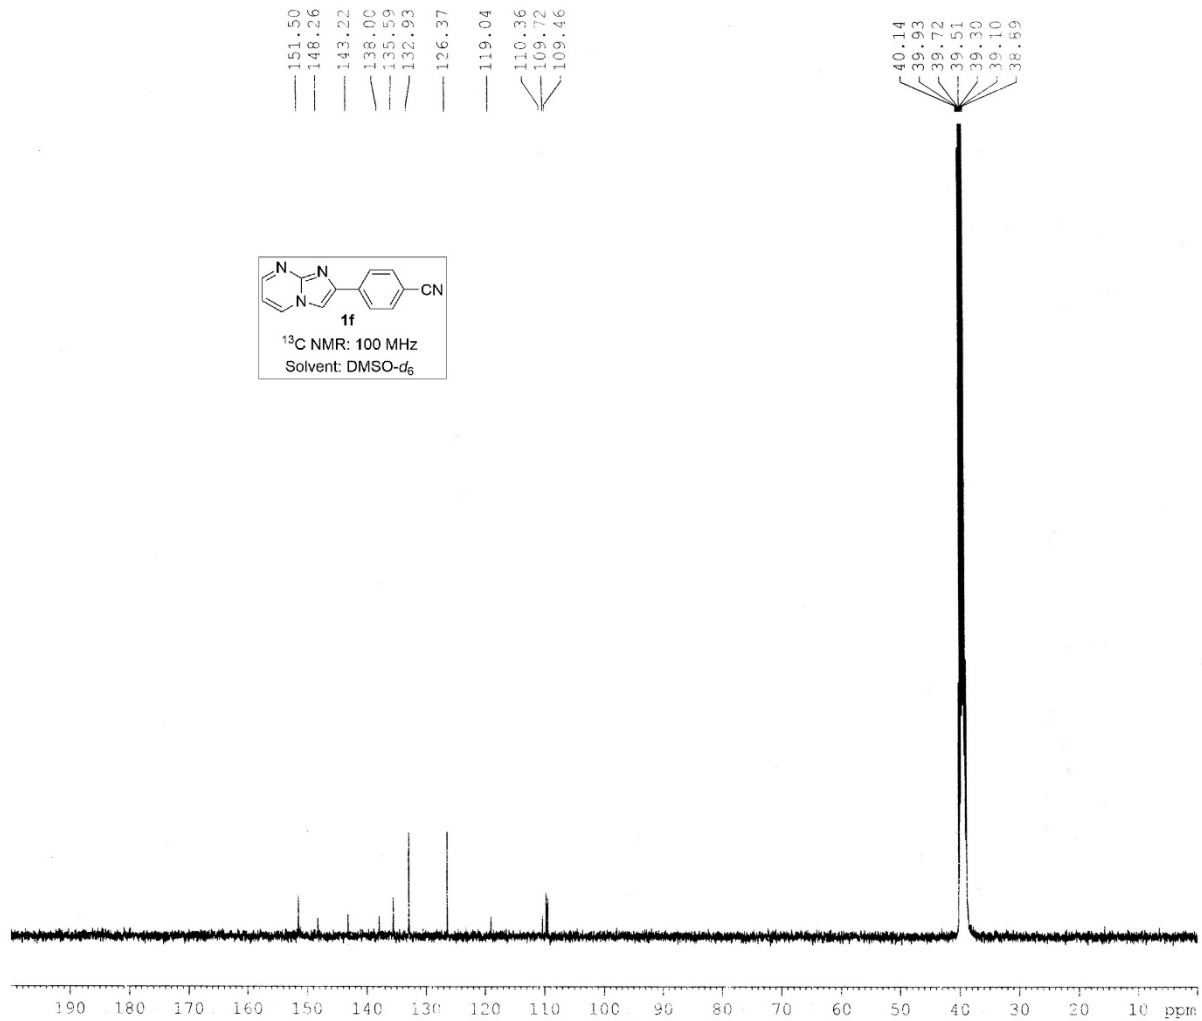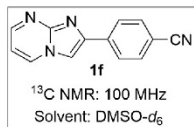

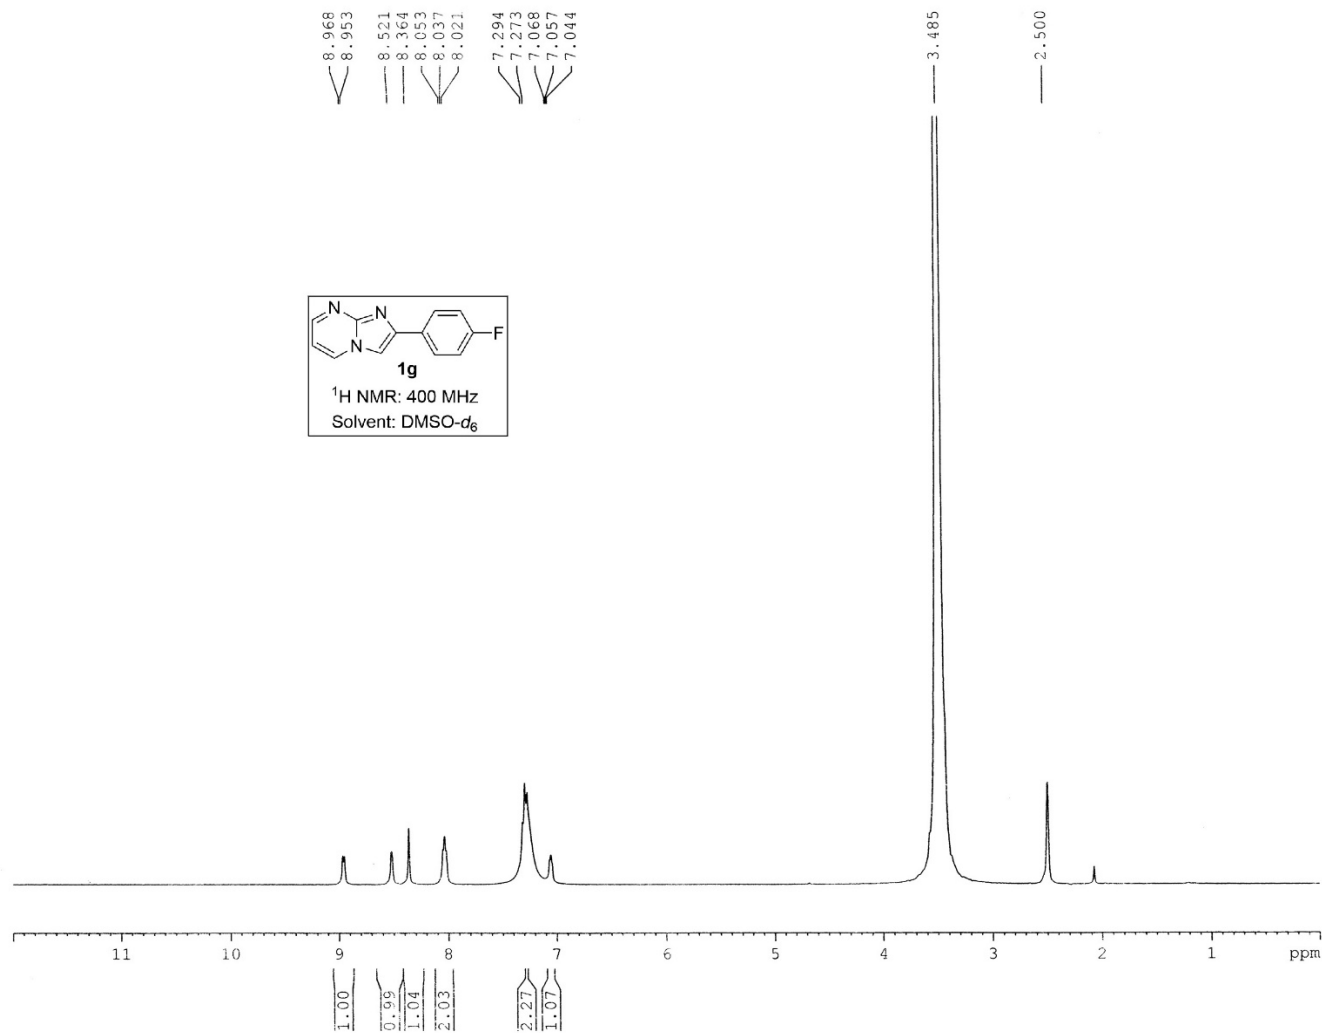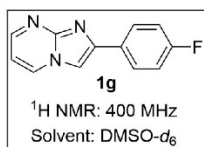

Current Data Parameters  
 NAME Dr. A HAJRA 2026 1H  
 EXPNO 121  
 PROCNO 1

F2 - Acquisition Parameters  
 Date\_ 20260216  
 Time 20.57  
 INSTRUM spect  
 PROBHD 5 mm PABBO BB/  
 PULPROG zg30  
 TD 32768  
 SOLVENT DMSO  
 NS 8  
 DS 2  
 SWH 8223.685 Hz  
 FIDRES 0.250967 Hz  
 AQ 1.9922944 sec  
 RG 54.07  
 DW 60.800 usec  
 DE 6.50 usec  
 TE 292.6 K  
 DI 1.00000000 sec  
 TDO 1

===== CHANNEL f1 =====  
 SFO1 400.1524711 MHz  
 NUC1 1H  
 P1 14.75 usec  
 PLW1 12.00000000 W

F2 - Processing parameters  
 SI 16384  
 SF 400.1500030 MHz  
 WDW EM  
 SSB 0  
 LB 0.30 Hz  
 GB 0  
 PC 1.00

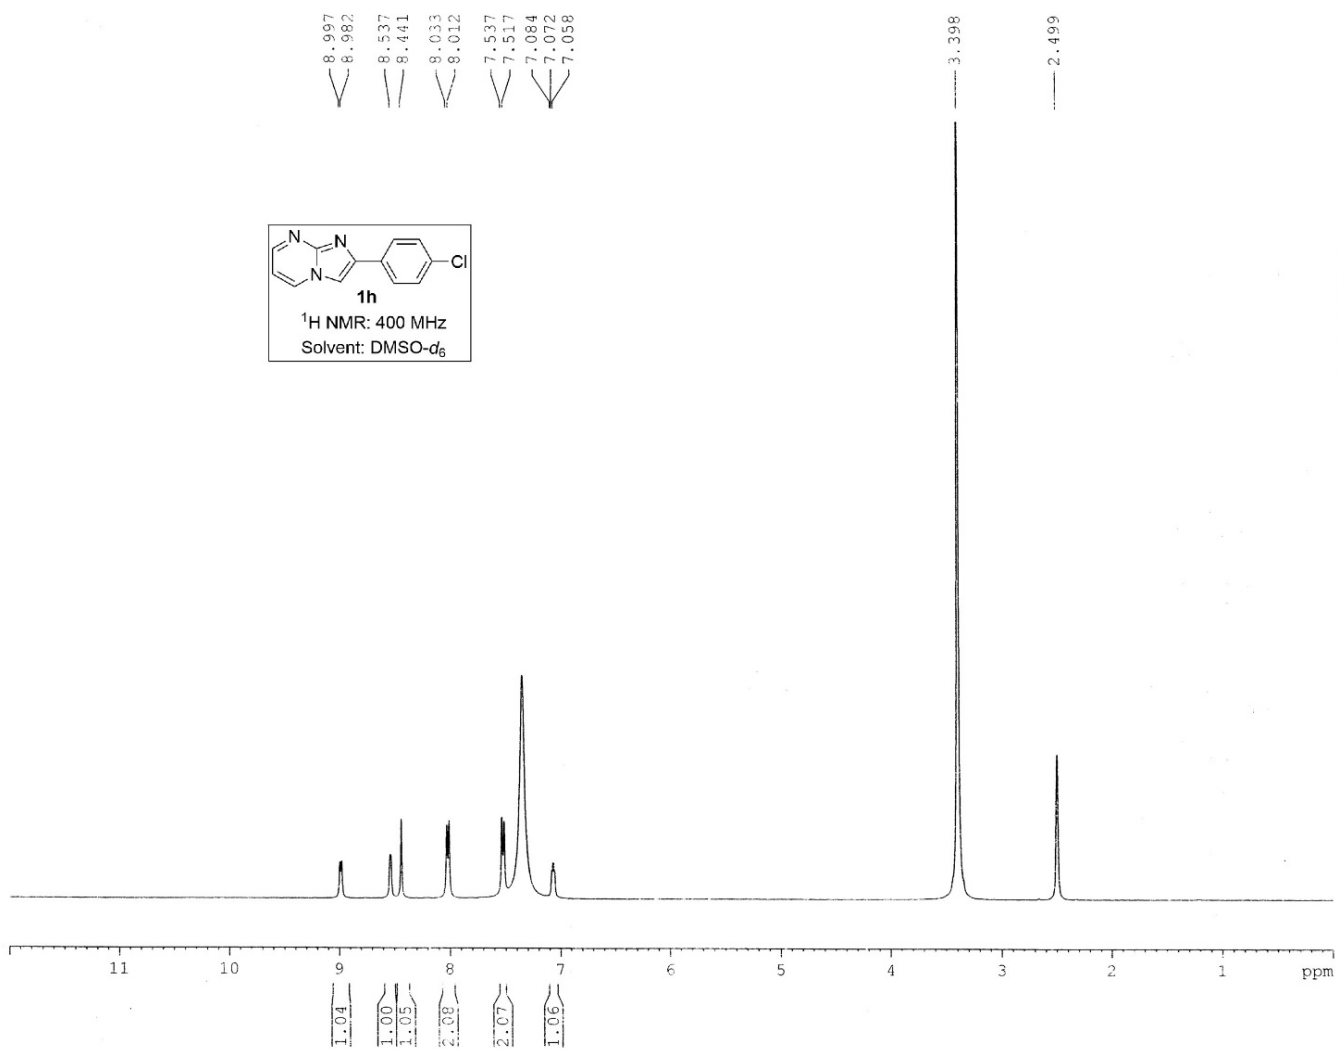

Current Data Parameters  
 NAME Dr. A HAJRA 2026 1H  
 EXPNO 91  
 PROCNO 1

F2 - Acquisition Parameters  
 Date\_ 20260207  
 Time\_ 13.23  
 INSTRUM spect  
 PROBHD 5 mm PABBO BB/  
 PULPROG zg30  
 TD 32768  
 SOLVENT DMSO  
 NS 8  
 DS 2  
 SWH 8223.685 Hz  
 FIDRES 0.250967 Hz  
 AQ 1.9922944 sec  
 RG 120.16  
 DW 60.800 usec  
 DE 6.50 usec  
 TE 289.1 K  
 D1 1.00000000 sec  
 TD0 1

===== CHANNEL f1 =====  
 SFO1 400.1524711 MHz  
 NUC1 1H  
 P1 14.75 usec  
 PLW1 12.00000000 W

F2 - Processing parameters  
 SI 16384  
 SF 400.1500025 MHz  
 WDW EM  
 SSB 0  
 LB 0.30 Hz  
 GB 0  
 PC 1.00

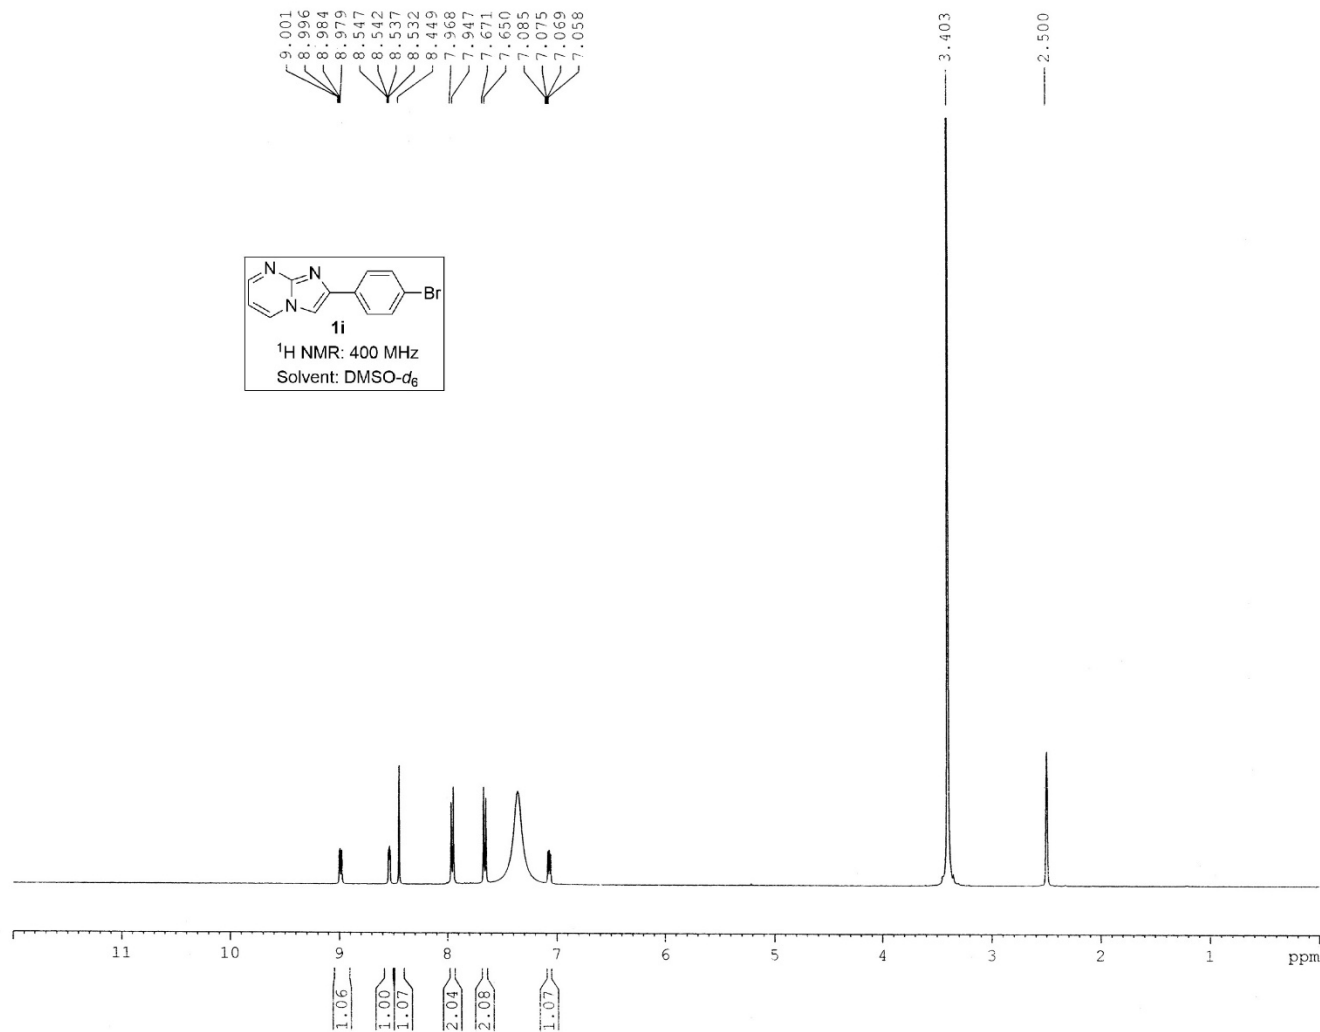

Current Data Parameters  
 NAME Dr. A HAJRA 2026 1H  
 EXPNO 92  
 PROCNO 1

F2 - Acquisition Parameters  
 Date\_ 20260207  
 Time 13.32  
 INSTRUM spect  
 PROBHD 5 mm PABBO BB/  
 PULPROG zg30  
 TD 32768  
 SOLVENT DMSO  
 NS 8  
 DS 2  
 SWH 8223.685 Hz  
 FIDRES 0.250967 Hz  
 AQ 1.9922944 sec  
 RG 120.16  
 DW 60.800 usec  
 DE 6.50 usec  
 TE 289.1 K  
 D1 1.00000000 sec  
 TD0 1

===== CHANNEL f1 =====  
 SFO1 400.1524711 MHz  
 NUC1 1H  
 P1 14.75 usec  
 PLW1 12.00000000 W

F2 - Processing parameters  
 SI 16384  
 SF 400.1500026 MHz  
 WDW EM  
 SSB 0  
 LB 0.30 Hz  
 GB 0  
 PC 1.00

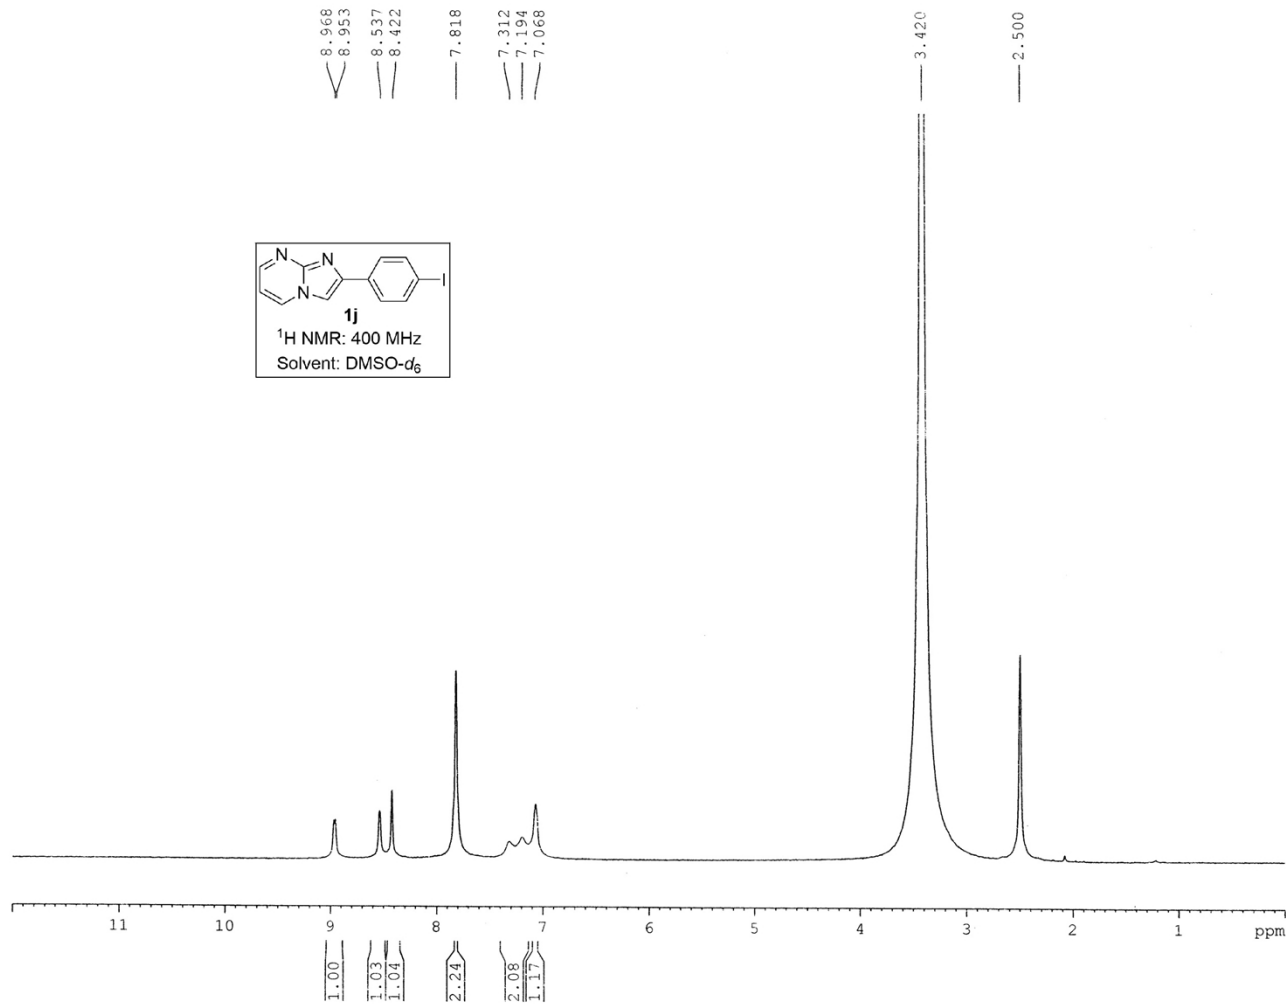

Current Data Parameters  
 NAME Dr. A HAJRA 2026 1H  
 EXPNO 102  
 PROCNO 1

F2 - Acquisition Parameters  
 Date\_ 20260209  
 Time\_ 12.55  
 INSTRUM spect  
 PROBHD 5 mm PABBO BB/  
 PULPROG zg30  
 TD 32768  
 SOLVENT DMSO  
 NS 8  
 DS 2  
 SWH 8223.685 Hz  
 FIDRES 0.250967 Hz  
 AQ 1.9922944 sec  
 RG 93.46  
 DW 60.800 usec  
 DE 6.50 usec  
 TE 288.3 K  
 D1 1.00000000 sec  
 TD0 1

==== CHANNEL f1 =====  
 SFO1 400.1524711 MHz  
 NUC1 1H  
 P1 14.75 usec  
 PLW1 12.00000000 W

F2 - Processing parameters  
 SI 16384  
 SF 400.1500018 MHz  
 WDW EM  
 SSB 0  
 LB 0.30 Hz  
 GB 0  
 PC 1.00

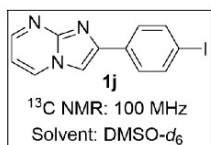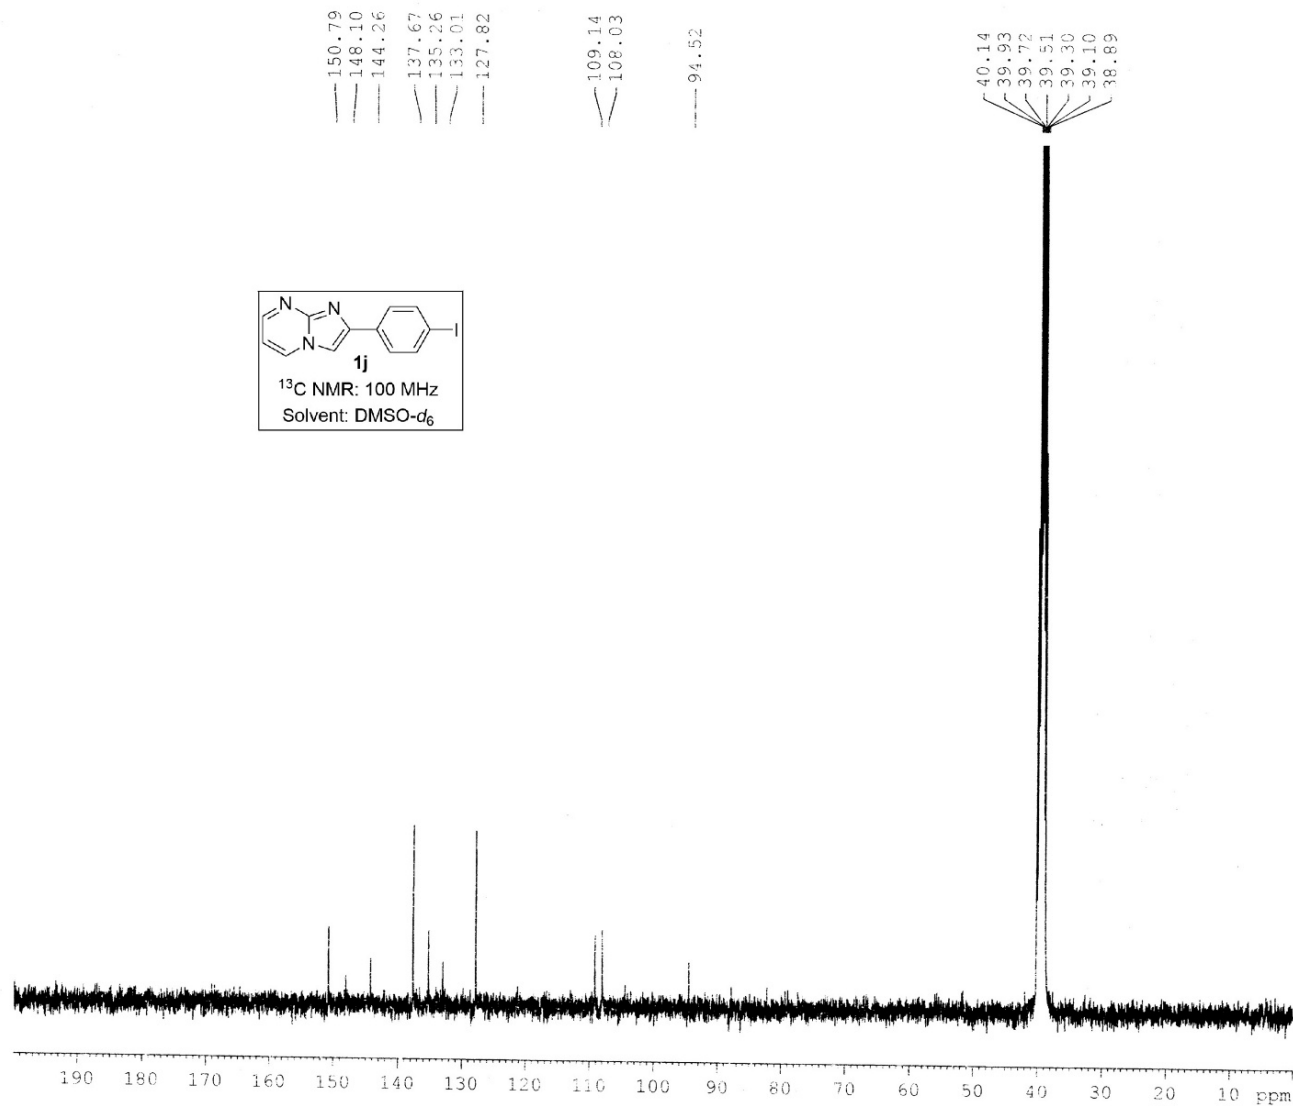

Current Data Parameters  
 NAME Dr. A HAJRA-2026-13C  
 EXPNO 51  
 PROCNO 1

F2 - Acquisition Parameters  
 Date\_ 20260203  
 Time 19.11  
 INSTRUM spect  
 PROBHD 5 mm PABBO BB/  
 PULPROG zgpg30  
 TD 32768  
 SOLVENT DMSO  
 NS 950  
 DS 2  
 SWH 24056.441 Hz  
 FIDRES 0.753536 Hz  
 AQ 0.6215744 sec  
 RG 186.42  
 DW 20.800 usec  
 DE 6.50 usec  
 TE 289.9 K  
 D1 2.0000000 sec  
 D11 0.0300000 sec  
 TDC 1

===== CHANNEL f1 =====  
 SFO1 100.6270588 MHz  
 NUC1 13C  
 P1 8.90 usec  
 PLW1 54.0000000 W

===== CHANNEL f2 =====  
 SFO2 400.1516006 MHz  
 NUC2 1H  
 CPDPRG12 waltz16  
 PCPD3 90.00 usec  
 PLW2 12.0000000 W  
 PLW12 0.32251000 W  
 PLW13 0.16212000 W

F2 - Processing parameters  
 SI 16384  
 SF 100.6178370 MHz  
 WDW EM  
 SSB 0  
 LB 1.00 Hz  
 GB 0  
 EC 1.40

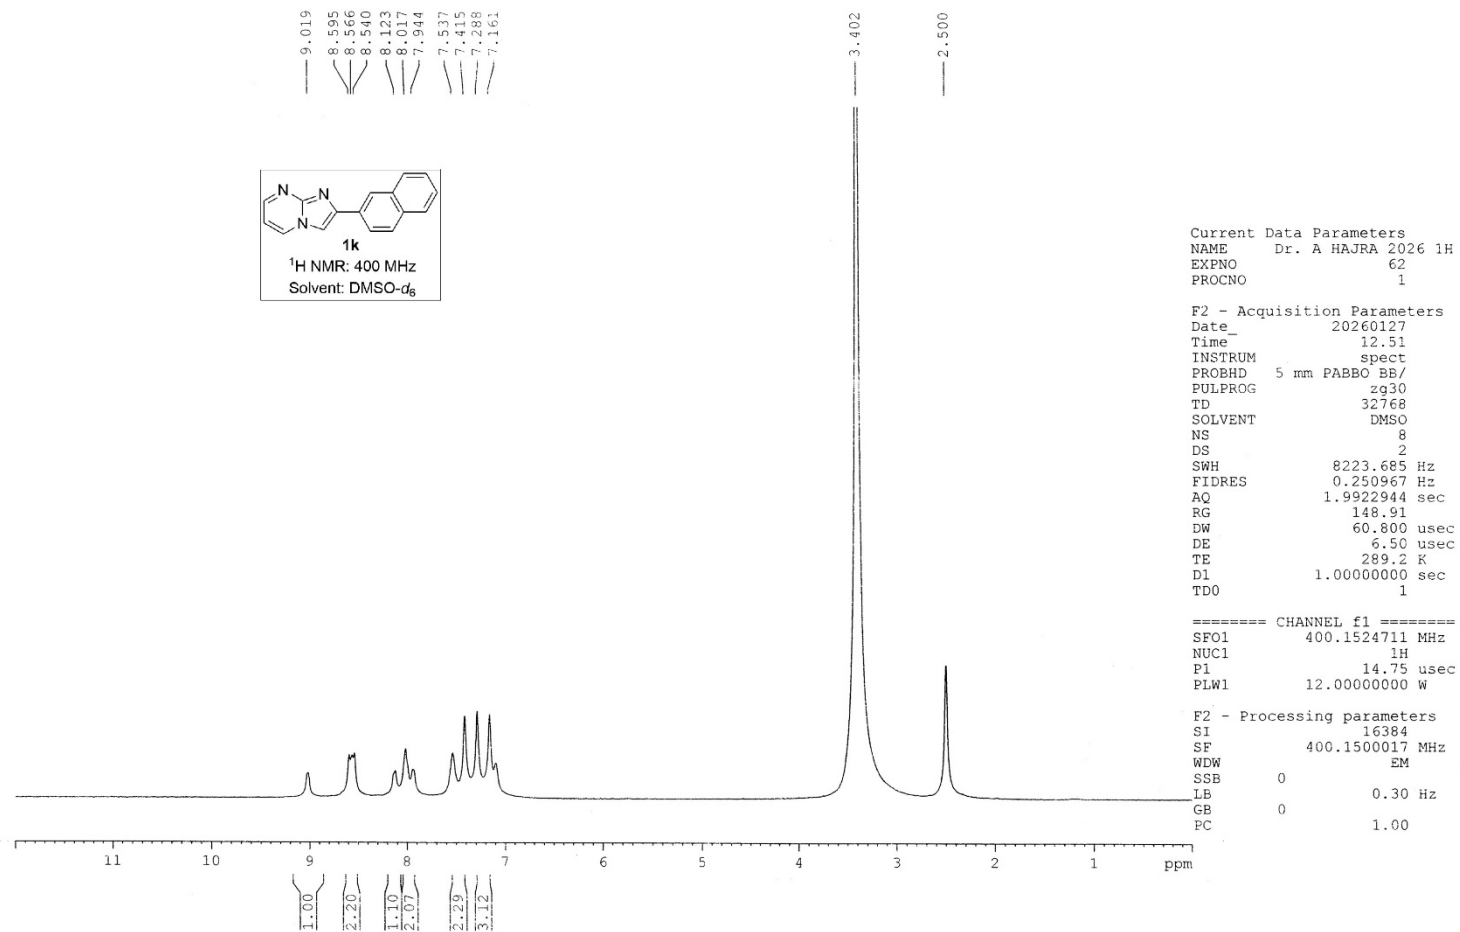

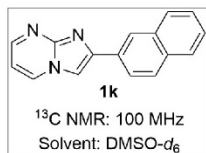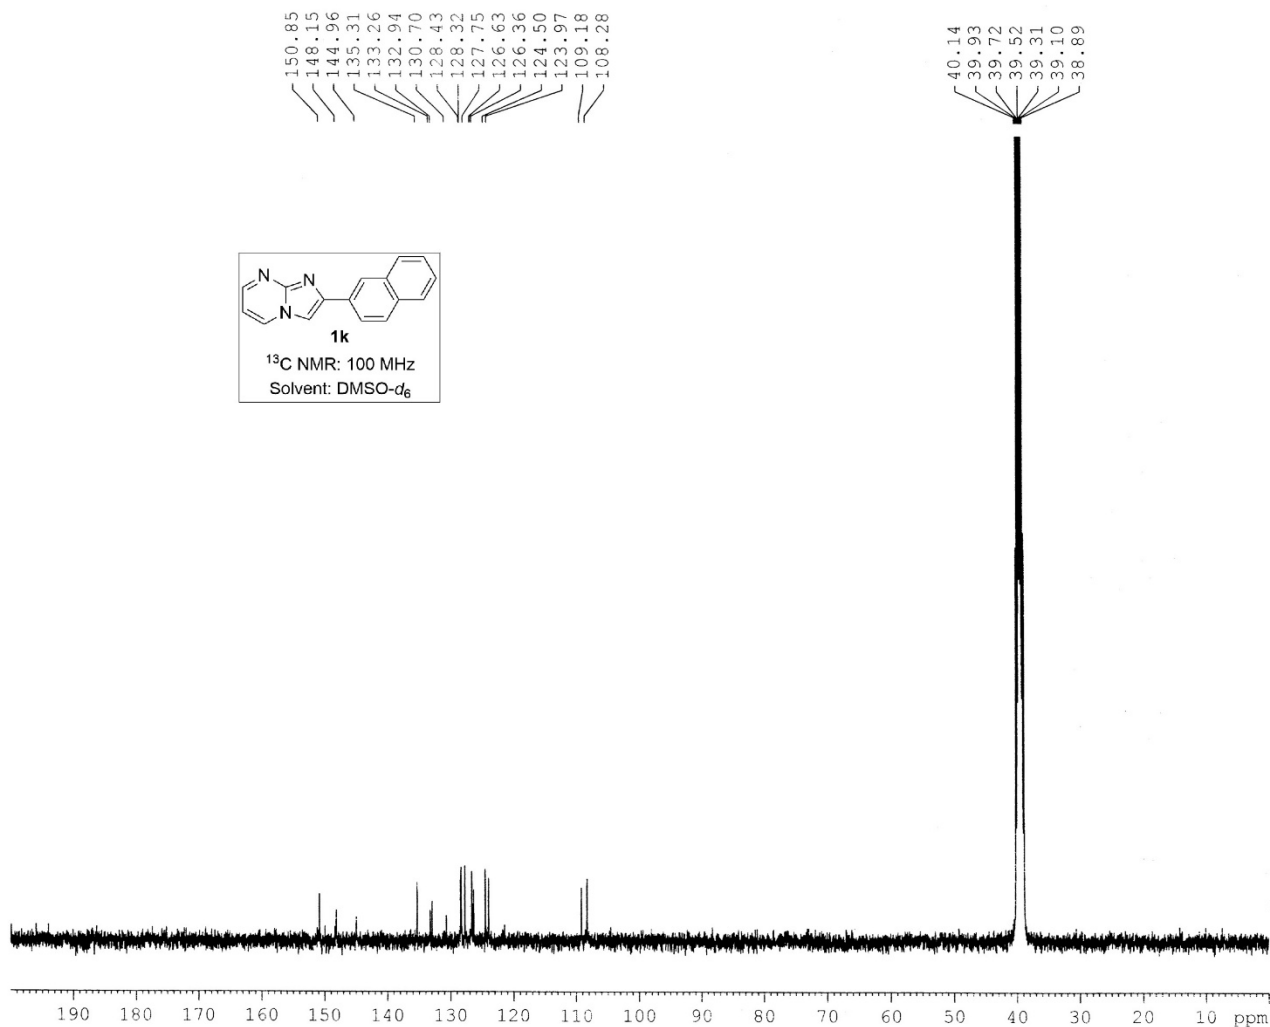

Current Data Parameters  
 NAME Dr. A HAJRA-2026-13C  
 EXPNO 56  
 PROCNO 1

F2 - Acquisition Parameters  
 Date\_ 20260207  
 Time\_ 13.13  
 INSTRUM spect  
 PROBHD 5 mm PABBO BB/  
 PULPROG zgpg30  
 TD 32768  
 SOLVENT DMSO  
 NS 700  
 DS 2  
 SWH 24038.461 Hz  
 FIDRES 0.733596 Hz  
 AQ 0.6815744 sec  
 RG 186.42  
 DW 20.800 usec  
 DE 6.50 usec  
 TE 289.6 K  
 D1 2.00000000 sec  
 D11 0.03000000 sec  
 TDO 1

===== CHANNEL f1 =====  
 SFO1 100.6278588 MHz  
 NUC1 13C  
 P1 8.90 usec  
 PLW1 54.00000000 W

===== CHANNEL f2 =====  
 SFO2 400.1516006 MHz  
 NUC2 1H  
 CPDPRG[2] waltz16  
 PCPD2 90.00 usec  
 PLW2 12.00000000 W  
 PLW12 0.32231000 W  
 PLW13 0.16212000 W

F2 - Processing parameters  
 SI 16384  
 SF 100.6178369 MHz  
 WDW EM  
 SSB 0  
 LB 1.00 Hz  
 GB 0  
 PC 1.40

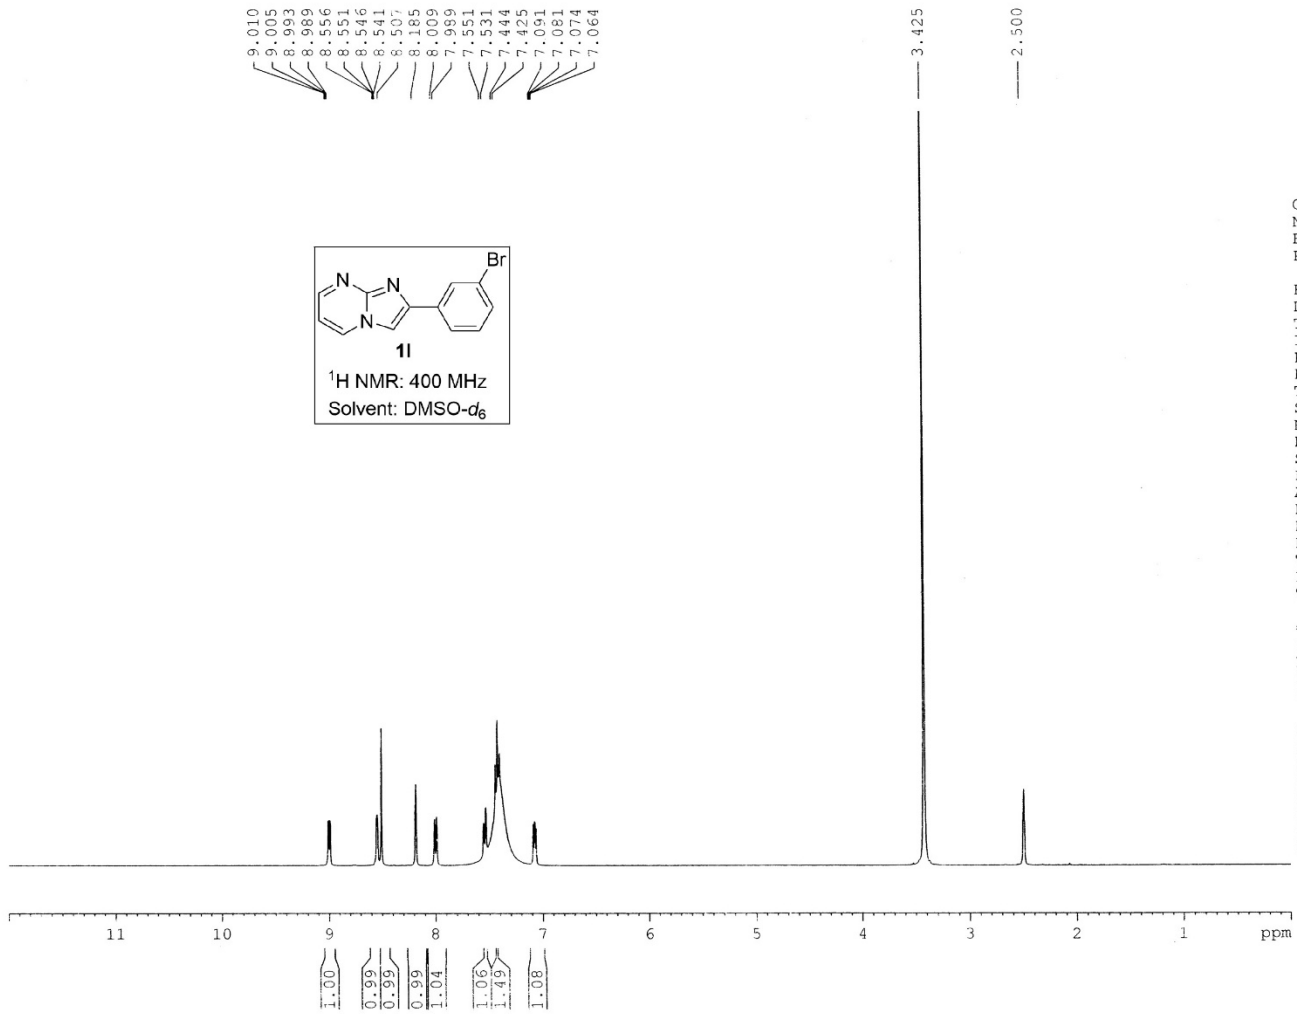

Current Data Parameters  
 NAME Dr. A HAJRA 2026 1H  
 EXPNO 83  
 PROCNO 1

F2 - Acquisition Parameters  
 Date\_ 20260202  
 Time 14.19  
 INSTRUM spect  
 PROBHD 5 mm PABBO BB/  
 PULPROG zg30  
 TD 32768  
 SOLVENT DMSO  
 NS 8  
 DS 2  
 SWH 8223.685 Hz  
 FIDRES 0.250967 Hz  
 AQ 1.9922944 sec  
 RG 120.16  
 DW 60.800 usec  
 DE 6.50 usec  
 TE 289.5 K  
 D1 1.00000000 sec  
 TD0 1

==== CHANNEL f1 =====  
 SFO1 400.1524711 MHz  
 NUC1 1H  
 P1 14.75 usec  
 PLW1 12.00000000 W

F2 - Processing parameters  
 SI 16384  
 SF 400.1500023 MHz  
 WDW EM  
 SSB 0  
 LB 0.30 Hz  
 GB 0  
 PC 1.00

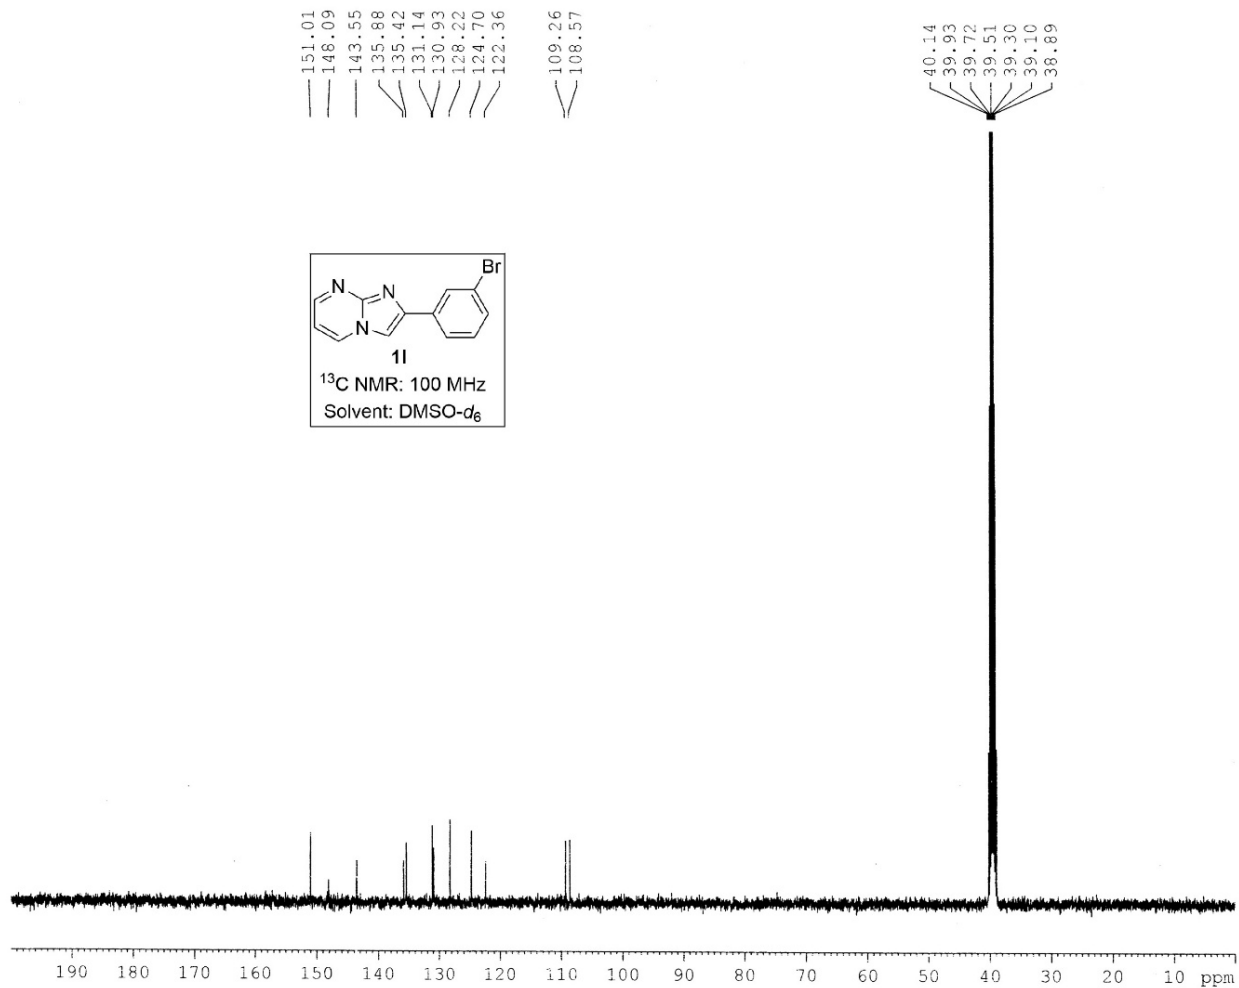

Current Data Parameters  
 NAME Dr. A HAJRA-2026-13C  
 EXPNO 50  
 PROCNO 1

F2 - Acquisition Parameters  
 Date\_ 20260202  
 Time 14.29  
 INSTRUM spect  
 PROBHD 5 mm PABBO BB/  
 PULPROG zgpg30  
 TD 32768  
 SOLVENT DMSO  
 NS 150  
 DS 2  
 SHH 24038.461 Hz  
 FIDRES 0.733596 Hz  
 AQ 0.6815744 sec  
 RG 166.42  
 DW 20.800 usec  
 DE 6.50 usec  
 TE 289.5 K  
 D1 2.00000000 sec  
 D11 0.03000000 sec  
 TDG 1

===== CHANNEL f1 =====  
 SF01 100.6278589 MHz  
 NUC1 13C  
 P1 8.90 usec  
 PLW1 54.00000000 W

===== CHANNEL f2 =====  
 SF02 400.1516006 MHz  
 NUC2 1H  
 CPDPRG[2] waitz1f  
 PCPD2 90.00 usec  
 PLW2 12.00000000 W  
 PLW12 0.32231000 W  
 PLW13 0.16212000 W

F2 - Processing parameters  
 SI 16384  
 SF 100.6178355 MHz  
 WDW EM  
 SSB 0  
 LB 1.00 Hz  
 GB 0  
 EC 1.40

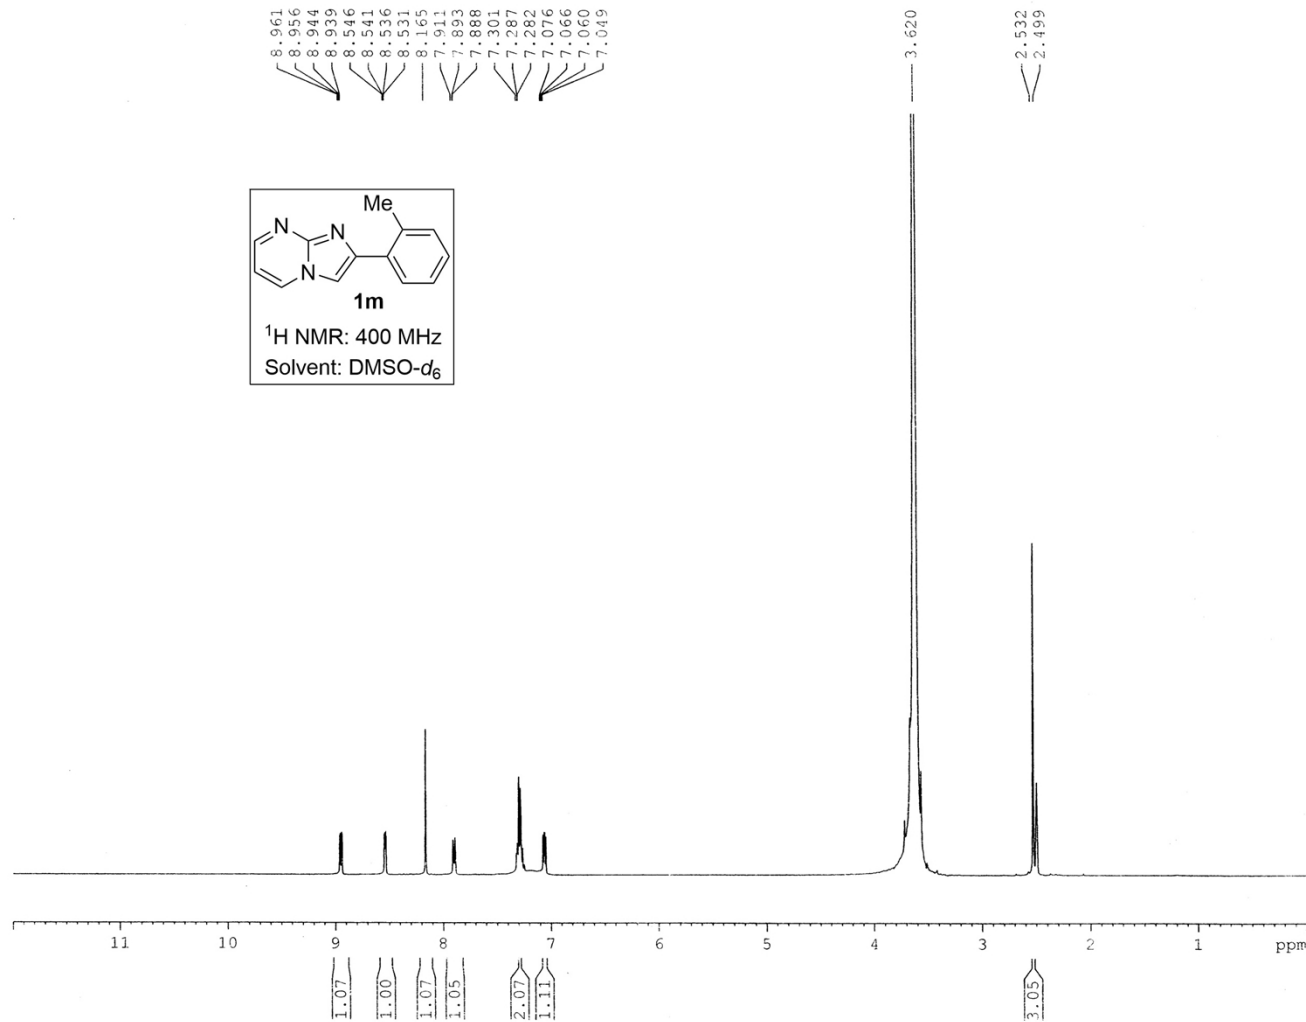

Current Data Parameters  
 NAME Dr. A HAJRA 2026 1H  
 EXPNO 79  
 PROCNO 1

F2 - Acquisition Parameters  
 Date\_ 20260202  
 Time\_ 13.55  
 INSTRUM spect  
 PROBHD 5 mm PABBO BB/  
 PULPROG zg30  
 TD 32768  
 SOLVENT DMSO  
 NS 8  
 DS 2  
 SWH 8223.685 Hz  
 FIDRES 0.250967 Hz  
 AQ 1.9922944 sec  
 RG 30.11  
 DW 60.800 usec  
 DE 6.50 usec  
 TE 290.3 K  
 D1 1.00000000 sec  
 TD0 1

===== CHANNEL f1 =====  
 SFO1 400.1524711 MHz  
 NUC1 1H  
 P1 14.75 usec  
 PLW1 12.00000000 W

F2 - Processing parameters  
 SI 16384  
 SF 400.1500029 MHz  
 WDW EM  
 SSB 0  
 LB 0.30 Hz  
 GB 0  
 PC 1.00

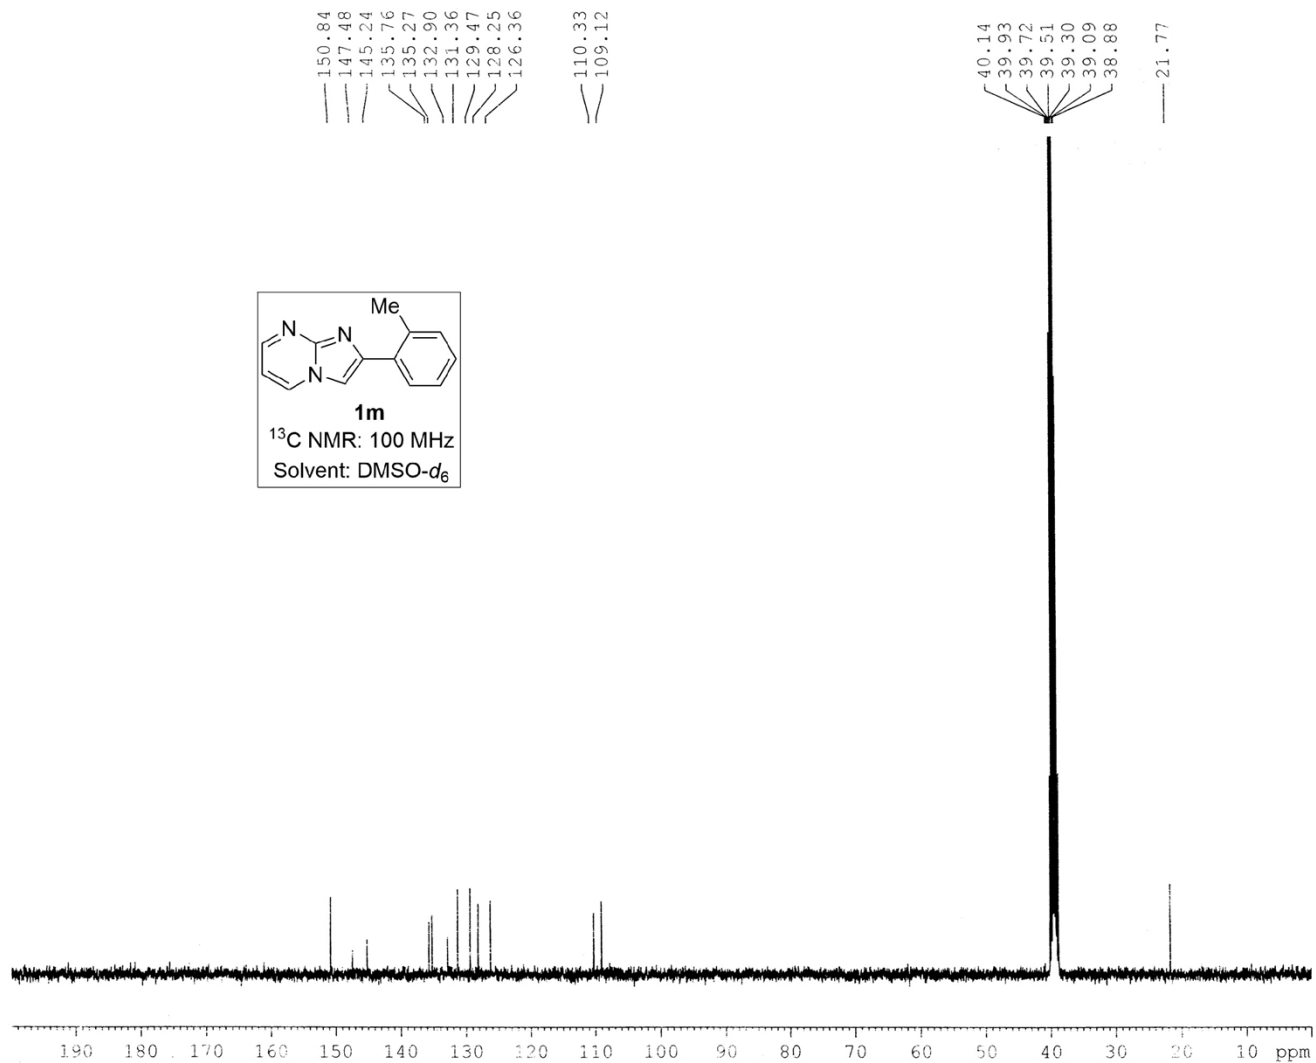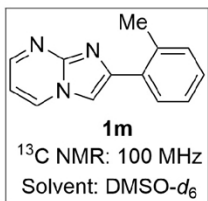

Current Data Parameters  
 NAME Dr. A HAJRA-2026-13C  
 EXPNO 49  
 PROCNO 1

F2 - Acquisition Parameters  
 Date\_ 20260202  
 Time 14.11  
 INSTRUM spect  
 PROBHD 5 mm PABBO BB/  
 PULPROG zgpg30  
 TD 32768  
 SOLVENT DMSO  
 NS 250  
 DS 2  
 SWH 24038.461 Hz  
 FIDRES 0.733396 Hz  
 AQ 0.6815744 sec  
 RG 186.42  
 DW 20.800 usec  
 DE 6.50 usec  
 TE 290.2 K  
 D1 2.00000000 sec  
 D11 0.03000000 sec  
 TD0 1

==== CHANNEL f1 =====  
 SFO1 100.6278588 MHz  
 NUC1 13C  
 P1 8.90 usec  
 PLW1 54.00000000 W

==== CHANNEL f2 =====  
 SFO2 400.1516006 MHz  
 NUC2 1H  
 CPDPRG[2] waitz16  
 PCPD2 90.00 usec  
 PLW2 12.00000000 W  
 PLW12 0.32231000 W  
 PLW13 0.16212000 W

F2 - Processing parameters  
 SI 16384  
 SF 100.6178135 MHz  
 WDW EM  
 SSB 0  
 LB 1.00 Hz  
 GB 0  
 PC 1.40

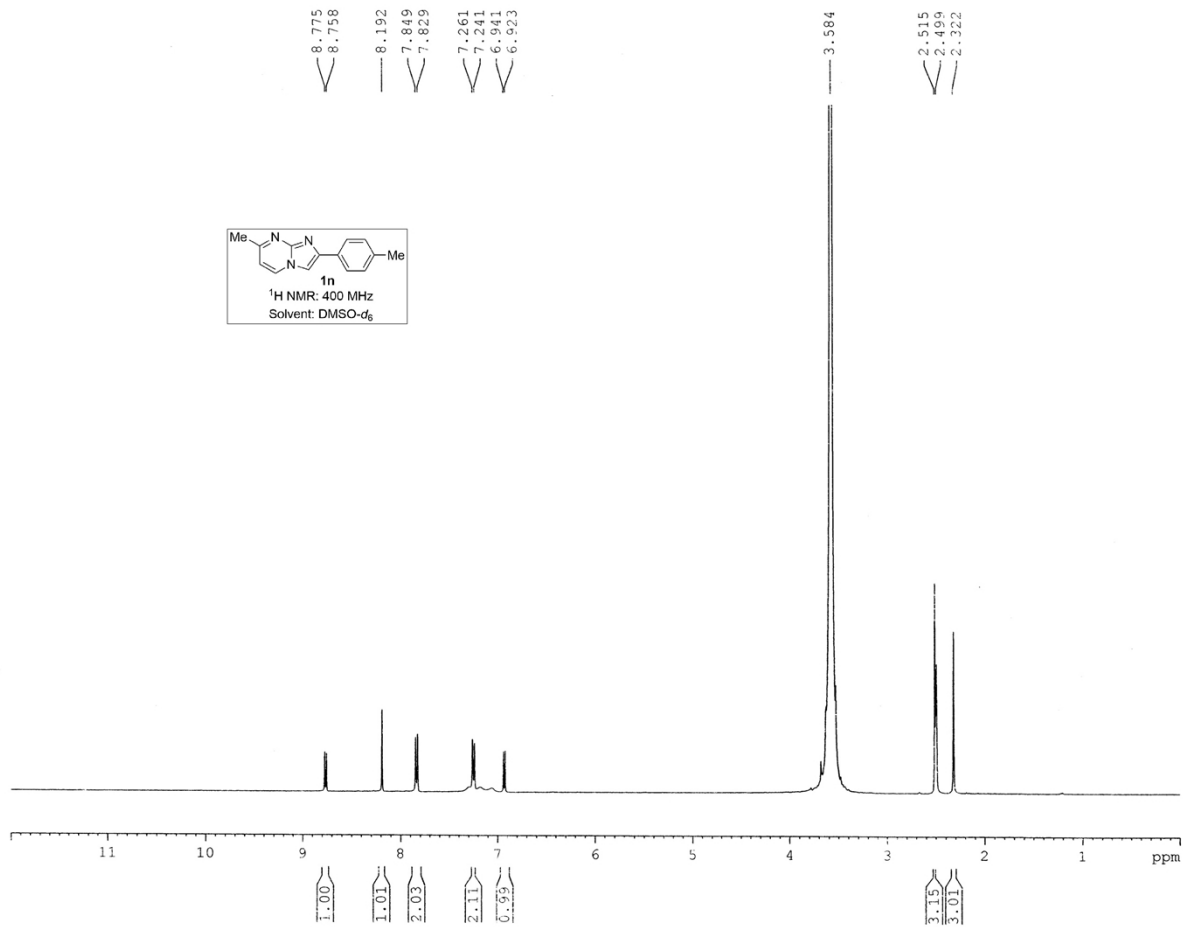

Current Data Parameters  
 NAME Dr. A HAJRA 2026 1H  
 EXPNO 10  
 PROCNO 1

F2 - Acquisition Parameters  
 Date\_ 20260108  
 Time 12.20  
 INSTRUM spect  
 PROBHD 5 mm PABBO BB/  
 PULPROG zg30  
 TD 32768  
 SOLVENT DMSO  
 NS 8  
 DS 2  
 SWH 9223.685 Hz  
 FIDRES 0.250967 Hz  
 AQ 1.9922944 sec  
 RG 37.83  
 DW 60.800 usec  
 DE 6.50 usec  
 TE 288.4 K  
 D1 1.00000000 sec  
 TD0 1

===== CHANNEL f1 =====  
 SFO1 400.1524711 MHz  
 NUC1 1H  
 P1 14.75 usec  
 PLW1 12.00000000 W

F2 - Processing parameters  
 SI 16384  
 SF 400.1500026 MHz  
 WDW EM  
 SSB 0  
 LB 0.30 Hz  
 GB 0  
 PC 1.00

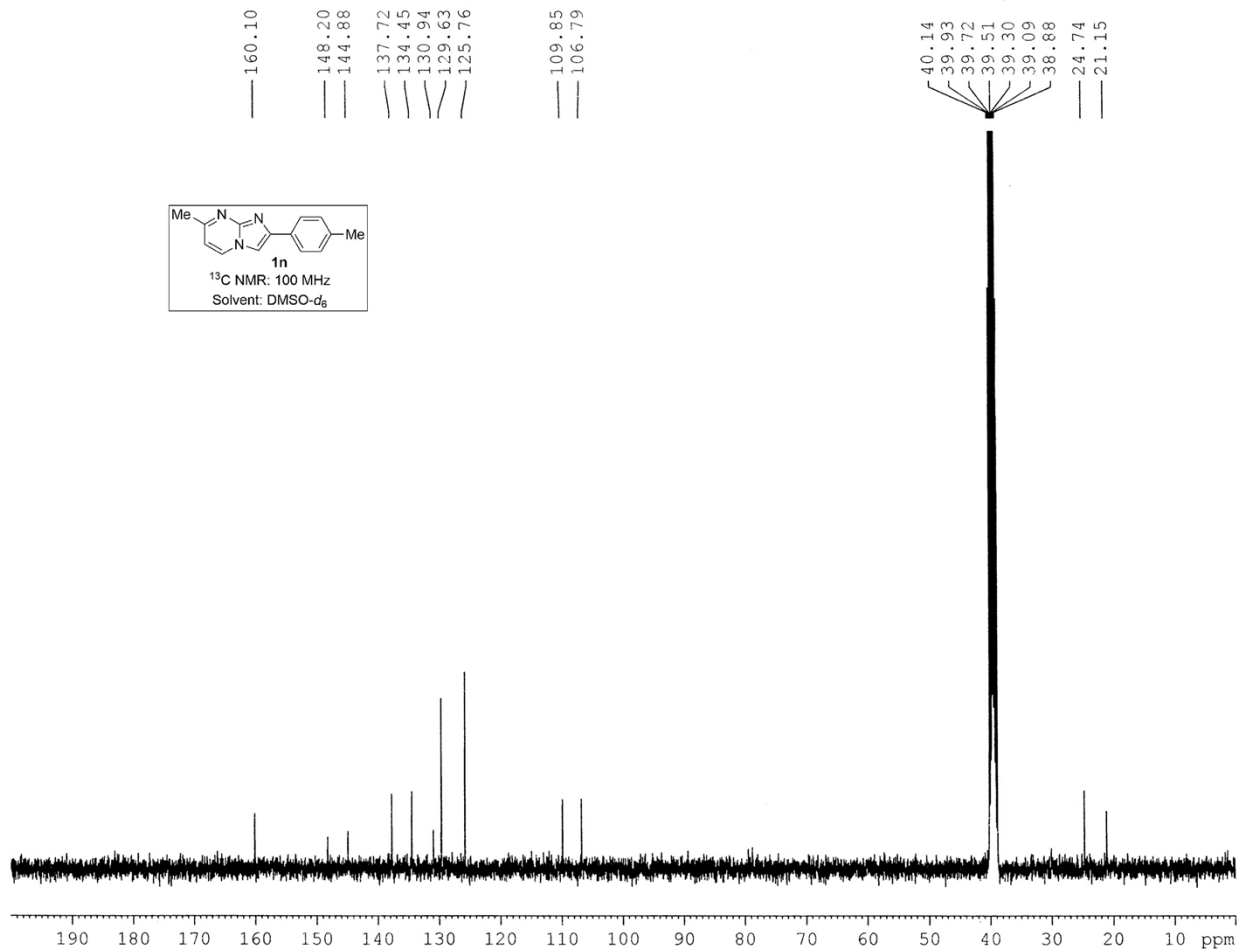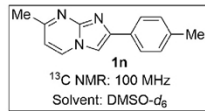

Current Data Parameters  
 NAME Dr. A HAJRA-2026-13C  
 EXPNO 7  
 PROCNO 1

F2 - Acquisition Parameters  
 Date\_ 20260108  
 Time 12.55  
 INSTRUM spect  
 PROBHD 5 mm PABBO BB/  
 PULPROG zgpg30  
 TD 32768  
 SOLVENT DMSO  
 NS 660  
 LS 2  
 SWH 24038.461 Hz  
 FLDRES 0.733596 Hz  
 AQ 0.6815744 sec  
 RG 186.42  
 DW 20.800 usec  
 DE 6.50 usec  
 TE 298.8 K  
 D1 2.0000000 sec  
 D11 0.0360000 sec  
 TDO 1

==== CHANNEL f1 =====  
 SFO1 100.6278588 MHz  
 NUC1 13C  
 P1 8.90 usec  
 PLW1 54.0000000 W

==== CHANNEL f2 =====  
 SFO2 400.1516006 MHz  
 NUC2 1H  
 CPDPRG(2) waltz16  
 PCPD2 90.06 usec  
 PLW2 12.0000000 W  
 PLW12 0.3223100 W  
 PLW13 0.1621200 W

F2 - Processing parameters  
 SI 16384  
 SF 100.6178170 MHz  
 WDW EM  
 SSB 0  
 LB 1.00 Hz  
 GB 0  
 FC 1.40

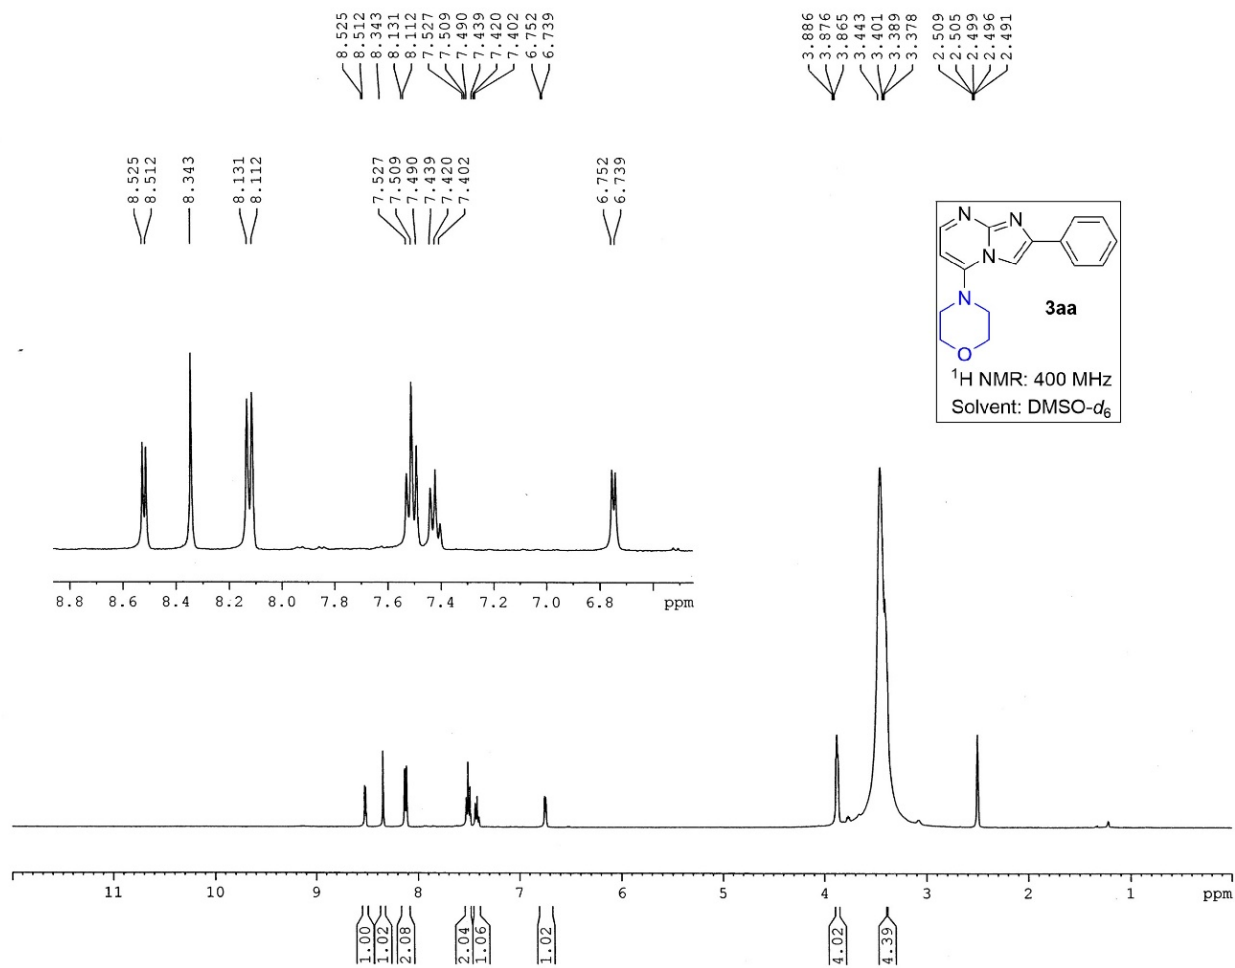

Current Data Parameters  
 NAME Dr. A HAJRA 2025 1H  
 EXPNO 375  
 PROCNO 1

F2 - Acquisition Parameters  
 Date\_ 20250704  
 Time 12.42  
 INSTRUM spect  
 PROBHD 5 mm PABBO BB/  
 PULPROG zg30  
 TD 32768  
 SOLVENT DMSO  
 NS 8  
 DS 2  
 SWH 8223.685 Hz  
 FIDRES 0.250967 Hz  
 AQ 1.9922944 sec  
 RG 87.66  
 DW 60.800 usec  
 DE 6.50 usec  
 TE 293.3 K  
 D1 1.00000000 sec  
 TD0 1

===== CHANNEL f1 =====  
 SFO1 400.1524711 MHz  
 NUC1 1H  
 P1 14.75 usec  
 PLW1 12.00000000 W

F2 - Processing parameters  
 SI 16384  
 SF 400.1500031 MHz  
 WDW EM  
 SSB 0  
 LB 0.30 Hz  
 GB 0  
 PC 1.00

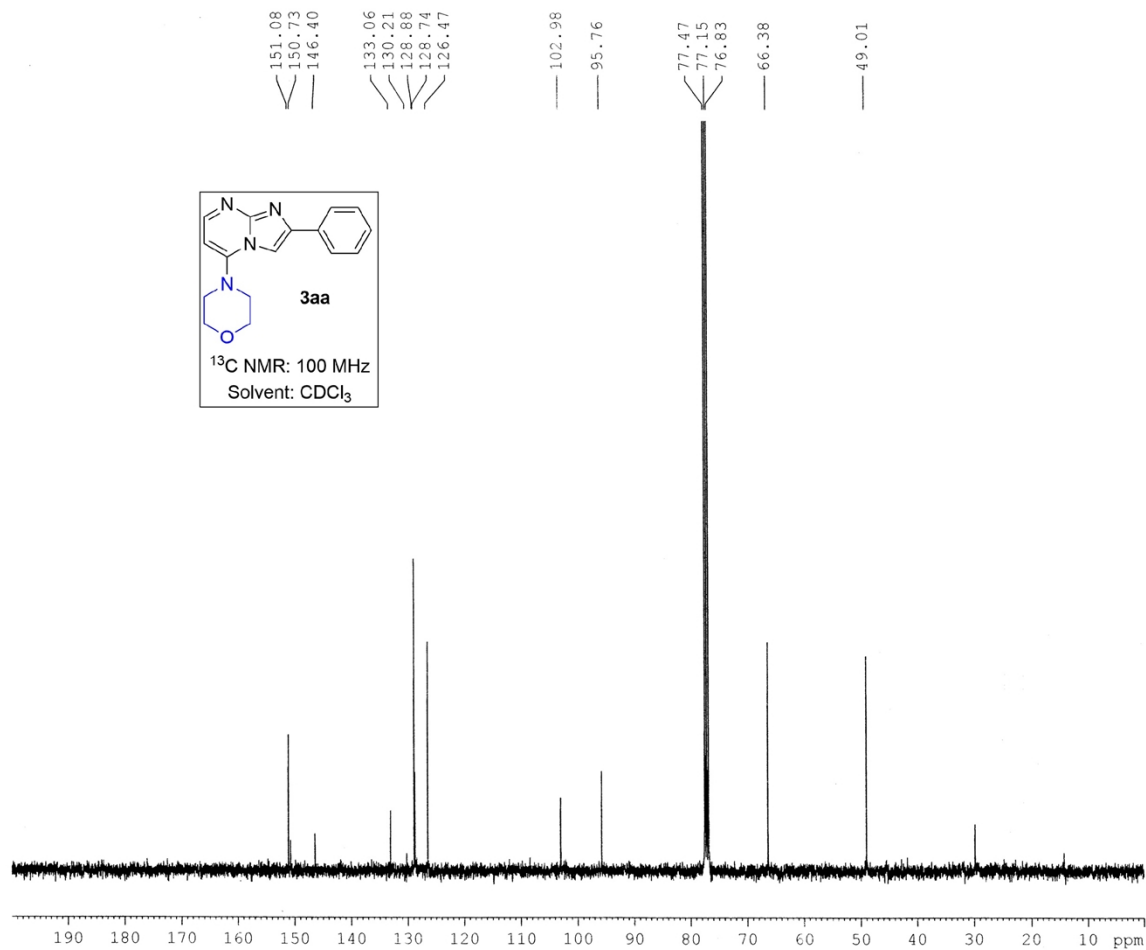

```

Current Data Parameters
NAME      Dr. A HAJRA-2025-13C
EXPNO    163
PROCNO   1

F2 - Acquisition Parameters
Date_    20250516
Time     17.55
INSTRUM  spect
PROBHD   5 mm PABBO BB/
PULPROG  zgpg30
TD       32768
SOLVENT  CDCl3
NS       1000
DS       2
SWH      24035.4e1 Hz
FIDRES   0.75356 Hz
AQ       0.681574 sec
RG       196.45
DW       20.800 usec
DE       6.50 usec
TE       297.2 K
D1       2.0000000 sec
D11      0.0300000 sec
TDO      1

===== CHANNEL f1 =====
SFO1    100.6278568 MHz
NUC1     13C
P1       8.90 usec
PLW1    54.00000000 W

===== CHANNEL f2 =====
SFO2    400.1516006 MHz
NUC2     1H
CPDPRG12  waltz16
PCPD2    90.00 usec
PLW2    12.00000000 W
PLW12   0.32231000 W
PLW13   0.16212000 W

F2 - Processing parameters
SI       16384
SF       100.6177858 MHz
WUW      EM
SSB      0
LB       1.00 Hz
GB       0
PC       1.40
  
```

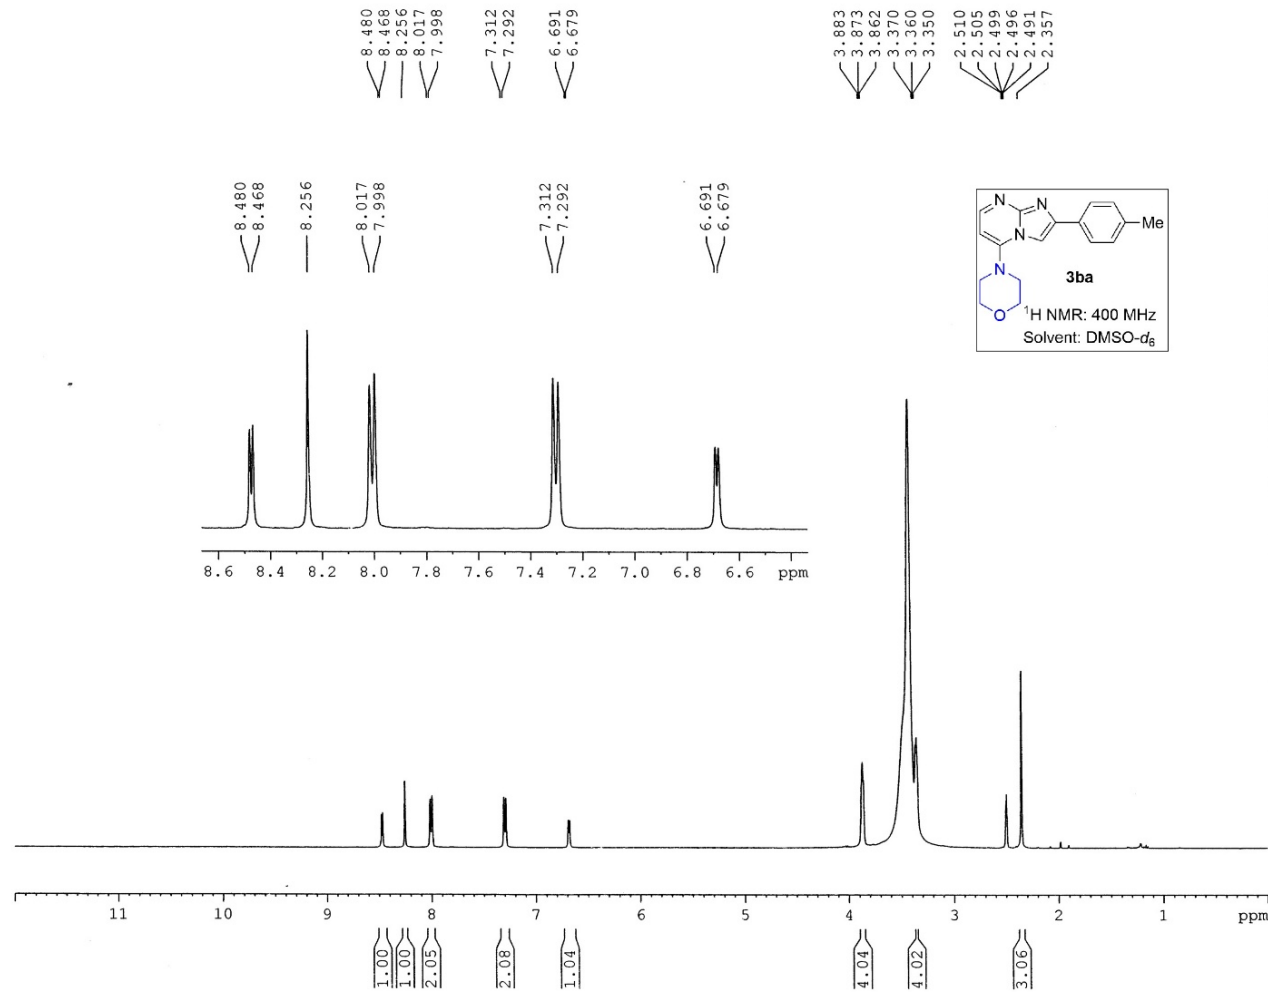

Current Data Parameters  
 NAME Dr. A HAJRA 2025 1H  
 EXPNO 286  
 PROCNO 1

F2 - Acquisition Parameters  
 Date\_ 20250527  
 Time 17.16  
 INSTRUM spect  
 PROBHD 5 mm PABBO BB/  
 PULPROG zg30  
 TD 32768  
 SOLVENT DMSO  
 NS 8  
 DS 2  
 SWH 8223.685 Hz  
 FIDRES 0.250967 Hz  
 AQ 1.9922944 sec  
 RG 77.59  
 DW 60.800 usec  
 DE 6.50 usec  
 TE 295.5 K  
 D1 1.00000000 sec  
 TD0 1

===== CHANNEL f1 =====  
 SF01 400.1524711 MHz  
 NUC1 1H  
 P1 14.75 usec  
 PLW1 12.00000000 W

F2 - Processing parameters  
 SI 16384  
 SF 400.1500031 MHz  
 WDW EM  
 SSB 0  
 LB 0.30 Hz  
 GB 0  
 PC 1.00

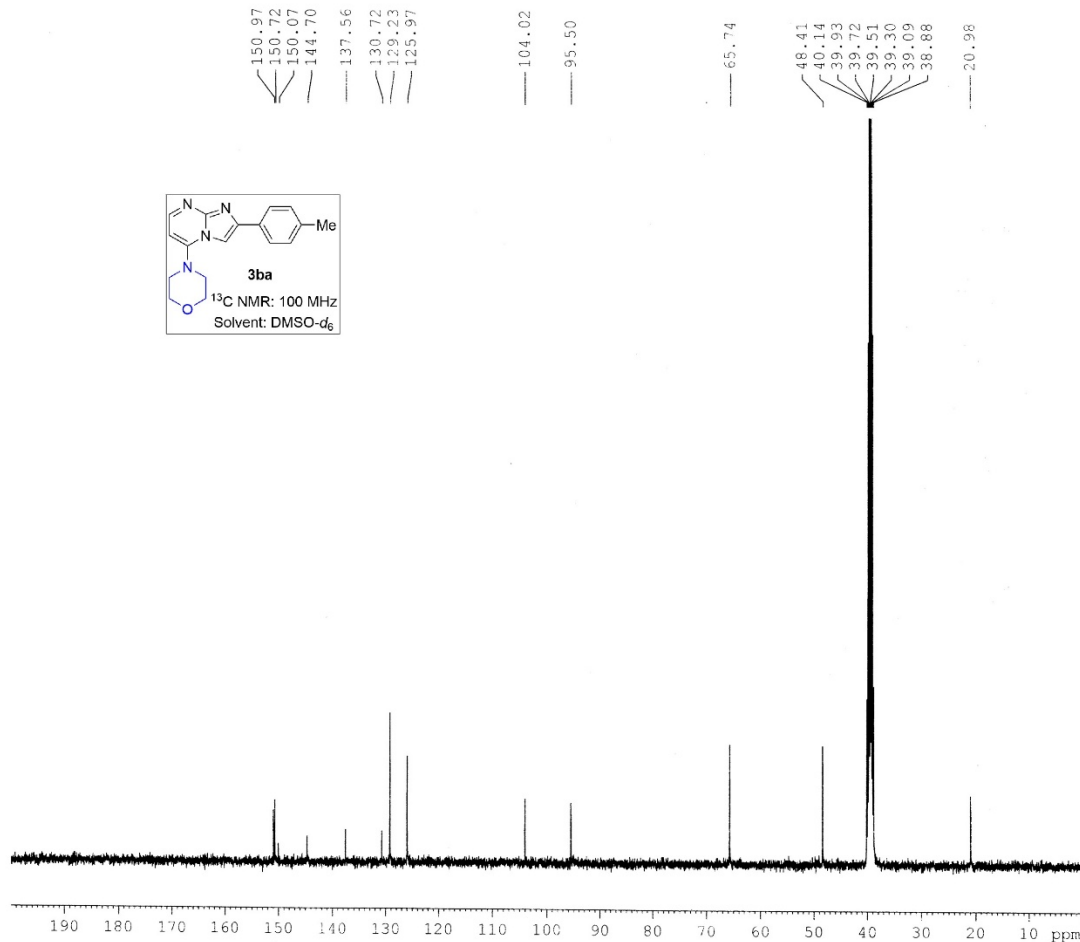

Current Data Parameters  
 NAME Dr. A HA7RA-2026-13C  
 EXPNO 81  
 PROCNO 1

F2 - Acquisition Parameters  
 Date\_ 20260222  
 Time\_ 11.52  
 INSTRUM spect  
 PROBHD 5 mm PABBO BB/  
 PULPROG zgpg30  
 TD 32768  
 SOLVENT DMSO  
 NS 500  
 DS 2  
 SWH 24039.461 Hz  
 FIDRES 0.733594 Hz  
 AQ 0.6915744 sec  
 RG 186.42  
 LW 26.800 usec  
 DE 6.50 usec  
 TE 290.4 K  
 D1 2.00000000 sec  
 D11 0.03000000 sec  
 TD0 1

\*\*\*\*\* CHANNEL f1 \*\*\*\*\*  
 SFO1 100.6278588 MHz  
 NUC1 13C  
 P1 8.90 usec  
 PLW1 54.00000000 W

\*\*\*\*\* CHANNEL f2 \*\*\*\*\*  
 SFO2 400.1516006 MHz  
 NUC2 1H  
 CPDPRG12 waltz16  
 PCPD2 90.00 usec  
 PLW2 12.00000000 W  
 PLW12 0.32231000 W  
 PLW13 0.16212000 W

F2 - Processing parameters  
 SI 16394  
 SF 100.6178583 MHz  
 WDW EM  
 SSB 0  
 LB 1.00 Hz  
 GB 0  
 PC 1.40

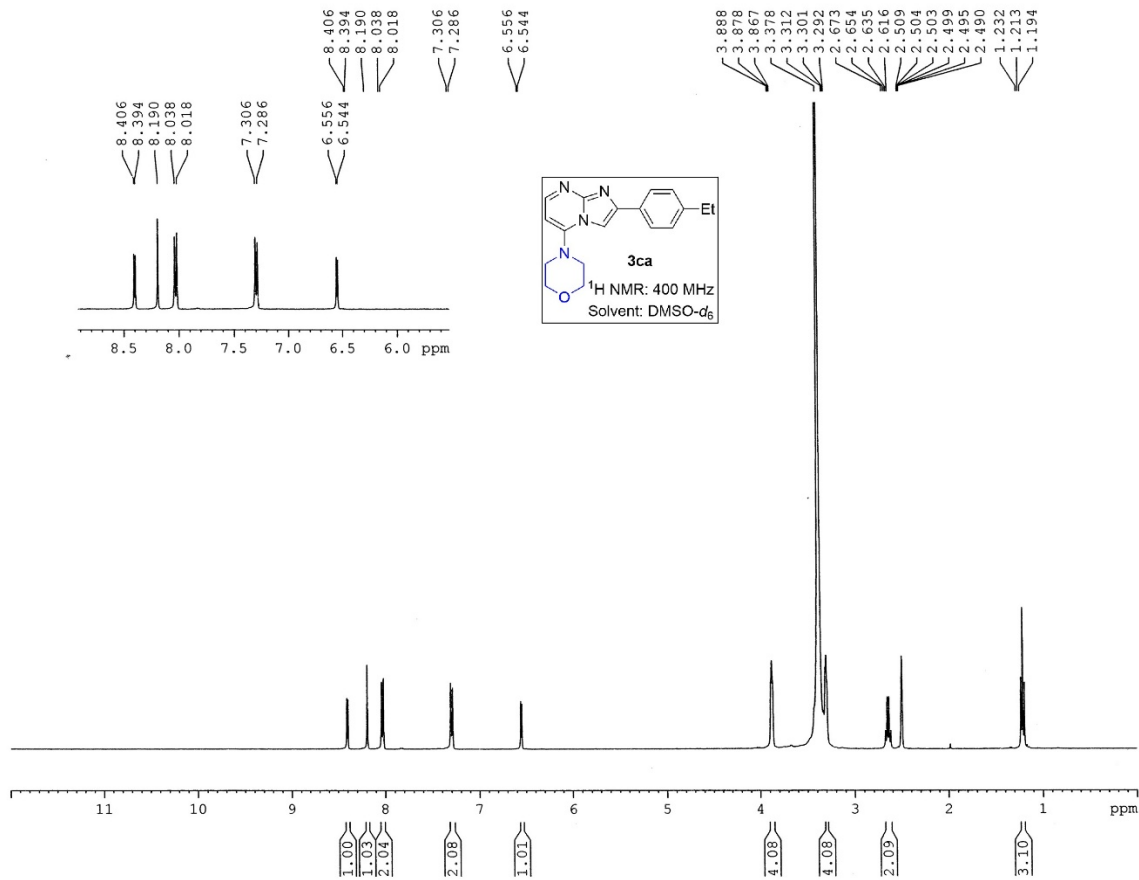

Current Data Parameters  
 NAME Dr. A HAJRA 2025 1H  
 EXPNO 313  
 PROCNO 1

F2 - Acquisition Parameters  
 Date 20250608  
 Time 18.57  
 INSTRUM spect  
 PROBHD 5 mm PABBO BB/  
 PULPROG zg30  
 TD 32768  
 SOLVENT DMSO  
 NS 8  
 DS 2  
 SWH 8223.685 Hz  
 FIDRES 0.250967 Hz  
 AQ 1.9922944 sec  
 RG 106.66  
 DW 60.800 usec  
 DE 6.50 usec  
 TE 293.9 K  
 D1 1.00000000 sec  
 TD0 1

===== CHANNEL f1 =====  
 SFO1 400.1524711 MHz  
 NUC1 1H  
 P1 14.75 usec  
 PLW1 12.00000000 W

F2 - Processing parameters  
 SI 16384  
 SF 400.1500031 MHz  
 WDW EM  
 SSB 0  
 LB 0.30 Hz  
 GB 0  
 PC 1.00

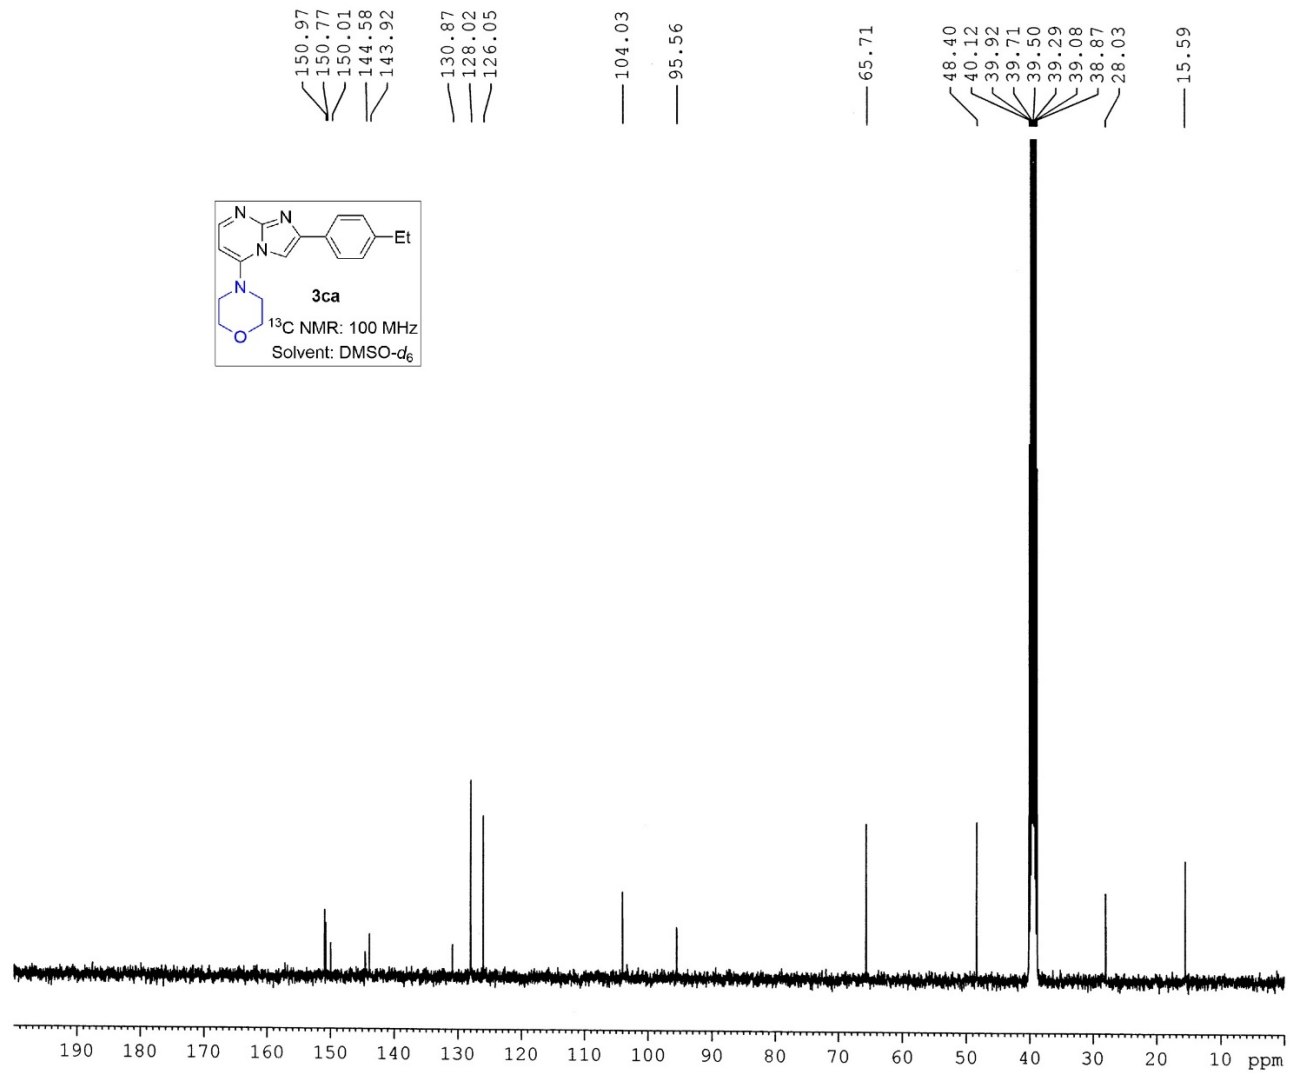

```

Current Data Parameters
NAME      Dr. A HAJRA-2025-13C
EXPNO     190
PROCNO    1

F2 - Acquisition Parameters
Date_     20250608
Time_     20.34
INSTRUM   spect
PROBHD    5 mm PABBO BB/
PULPROG   zgpg30
TD         32768
SOLVENT   DMSO
NS         2000
DS         2
SWH        24038.461 Hz
FIDRES     0.733596 Hz
AQ         0.6815744 sec
RG         186.42
DW         20.800 usec
DE         6.50 usec
TE         295.1 K
D1         2.00000000 sec
D11        0.03000000 sec
TD0        1

===== CHANNEL f1 =====
SFO1      100.6278588 MHz
NUC1       13C
P1         8.90 usec
PLW1       54.00000000 W

===== CHANNEL f2 =====
SFO2      400.1516006 MHz
NUC2        1H
CPDPRG[2]  waltz16
PCPD2      90.00 usec
PLW2       12.00000000 W
PLW12      0.32231000 W
PLW13      0.16212000 W

F2 - Processing parameters
SI         16384
SF         100.6178411 MHz
WDW        EM
SSB        0
LB         1.00 Hz
GB         0
PC         1.40
  
```

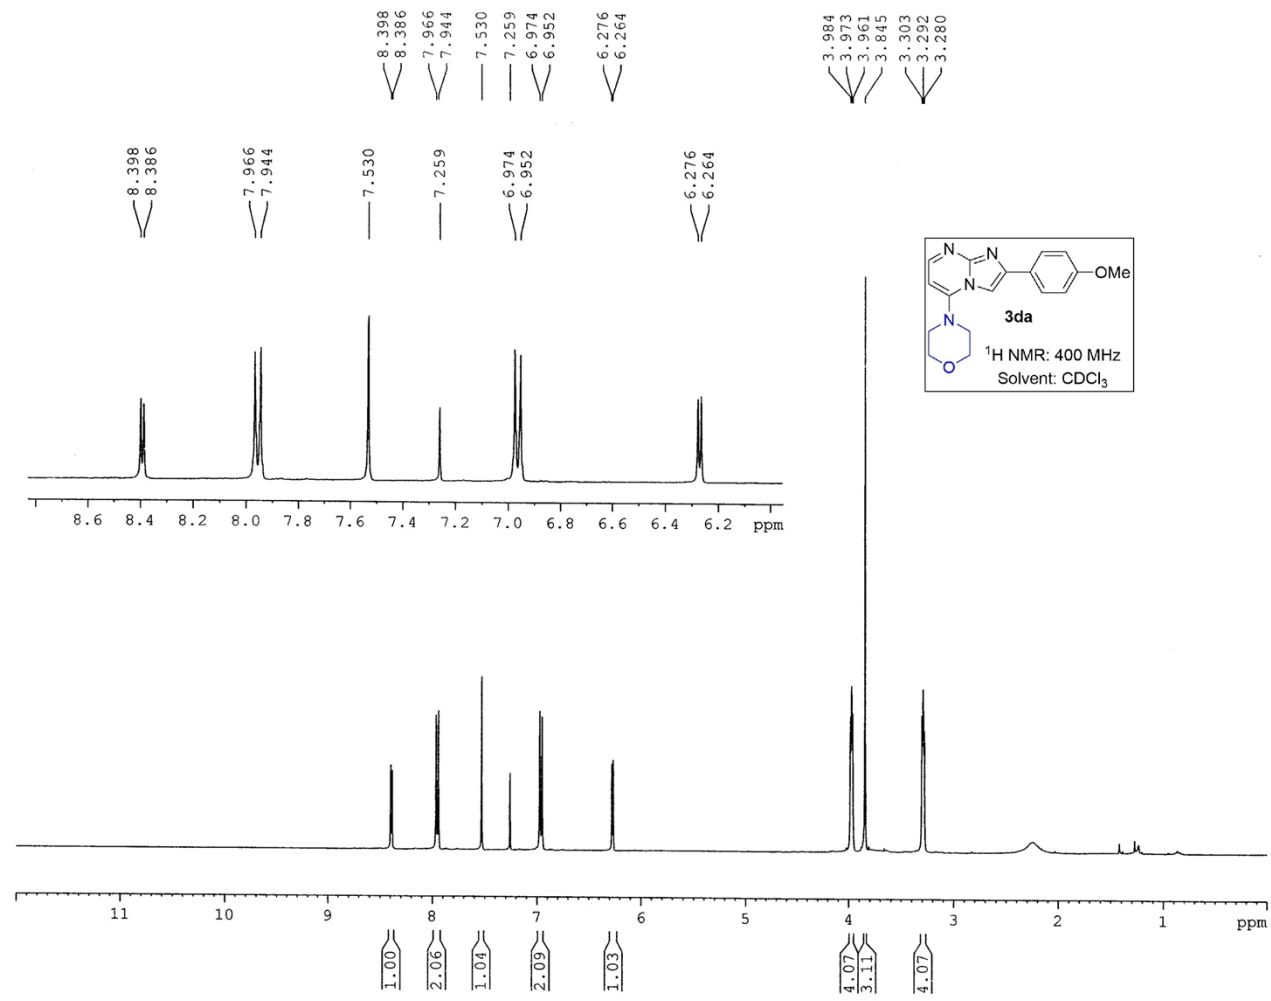

Current Data Parameters  
NAME Dr. A HAJRA 2026 1H  
EXPNO 269  
PROCNO 1

F2 - Acquisition Parameters  
Date\_ 20260502  
Time 11.07  
INSTRUM spect  
PROBHD 5 mm PABBO BB/  
PULPROG zg30  
TD 32768  
SOLVENT CDCl3  
NS 8  
DS 2  
SWH 8223.685 Hz  
FIDRES 0.250967 Hz  
AQ 1.9922944 sec  
RG 87.66  
DW 60.800 usec  
DE 6.50 usec  
TE 290.2 K  
D1 1.00000000 sec  
TD0 1

==== CHANNEL f1 =====  
SFO1 400.1524711 MHz  
NUC1 1H  
P1 14.75 usec  
PLW1 12.00000000 W

F2 - Processing parameters  
SI 16384  
SF 400.1500100 MHz  
WDW EM  
SSB 0  
LB 0.30 Hz  
GB 0  
PC 1.00

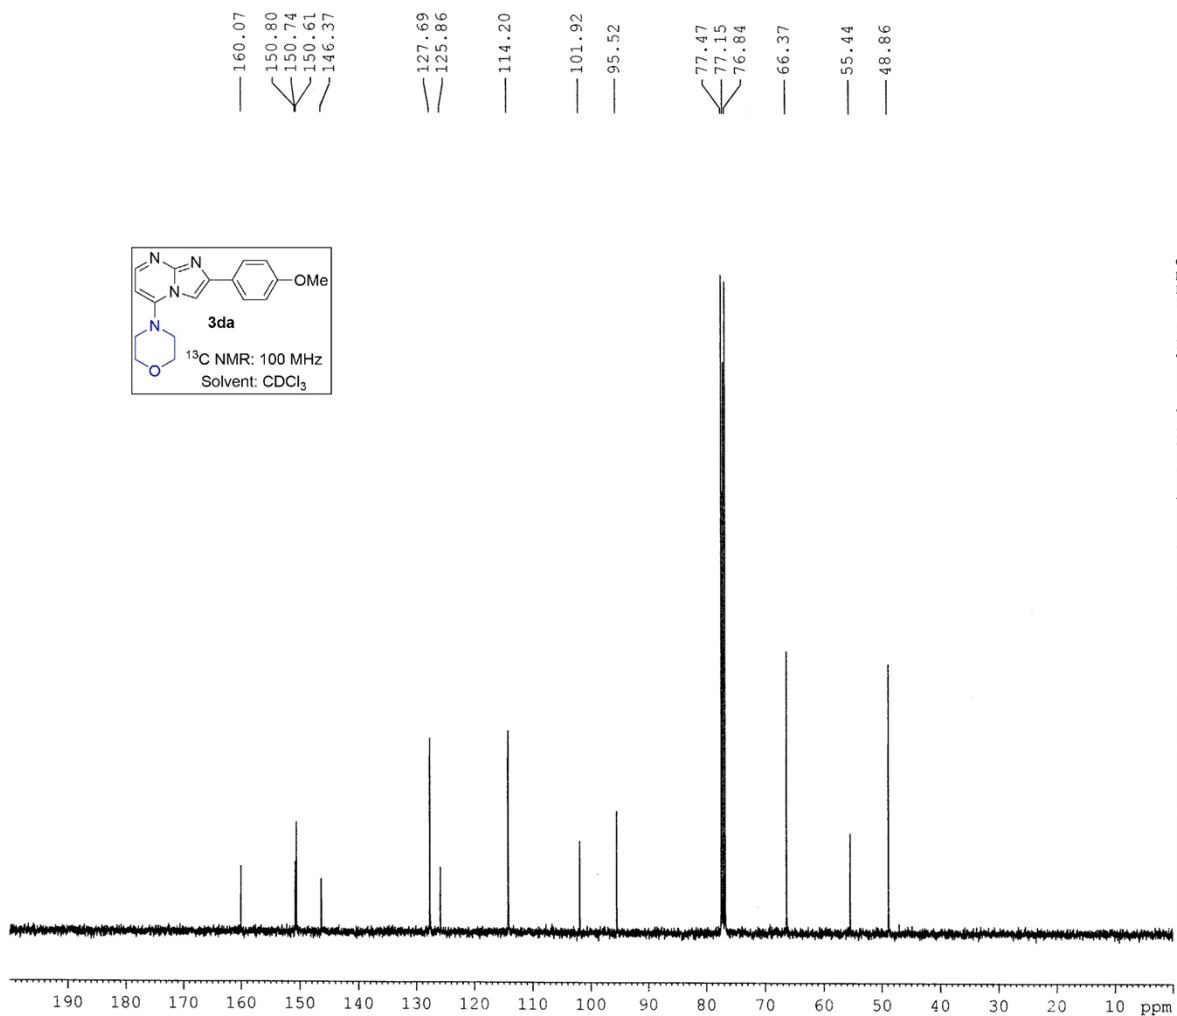

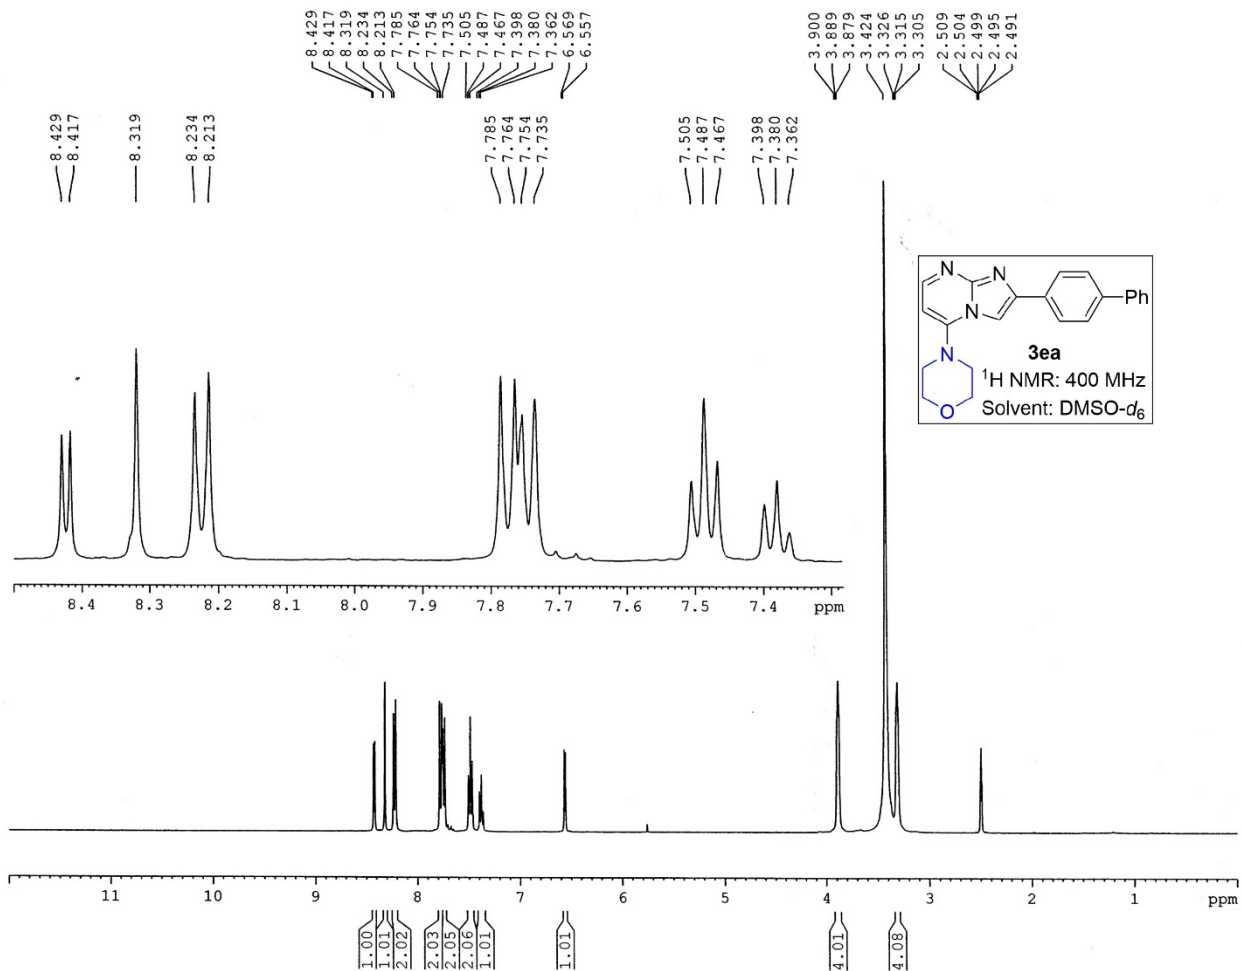

Current Data Parameters  
 NAME Dr. A HAJRA 2025 1H  
 EXPNO 662  
 PROCNO 1

F2 - Acquisition Parameters  
 Date\_ 20251108  
 Time\_ 12.12  
 INSTRUM spect  
 PROBHD 5 mm PABBO BB/  
 PULPROG zg30  
 TD 32768  
 SOLVENT DMSO  
 NS 8  
 DS 2  
 SWH 8223.685 Hz  
 FIDRES 0.250967 Hz  
 AQ 1.9922944 sec  
 RG 93.46  
 DW 60.800 usec  
 DE 6.50 usec  
 TE 289.1 K  
 D1 1.00000000 sec  
 TDO 1

===== CHANNEL f1 =====  
 SF01 400.1524711 MHz  
 NUC1 1H  
 P1 14.75 usec  
 PLW1 12.00000000 W

F2 - Processing parameters  
 SI 16384  
 SF 400.1500028 MHz  
 WDW EM  
 SSB 0  
 LB 0.30 Hz  
 GB 0  
 PC 1.00

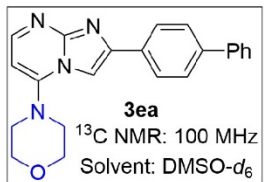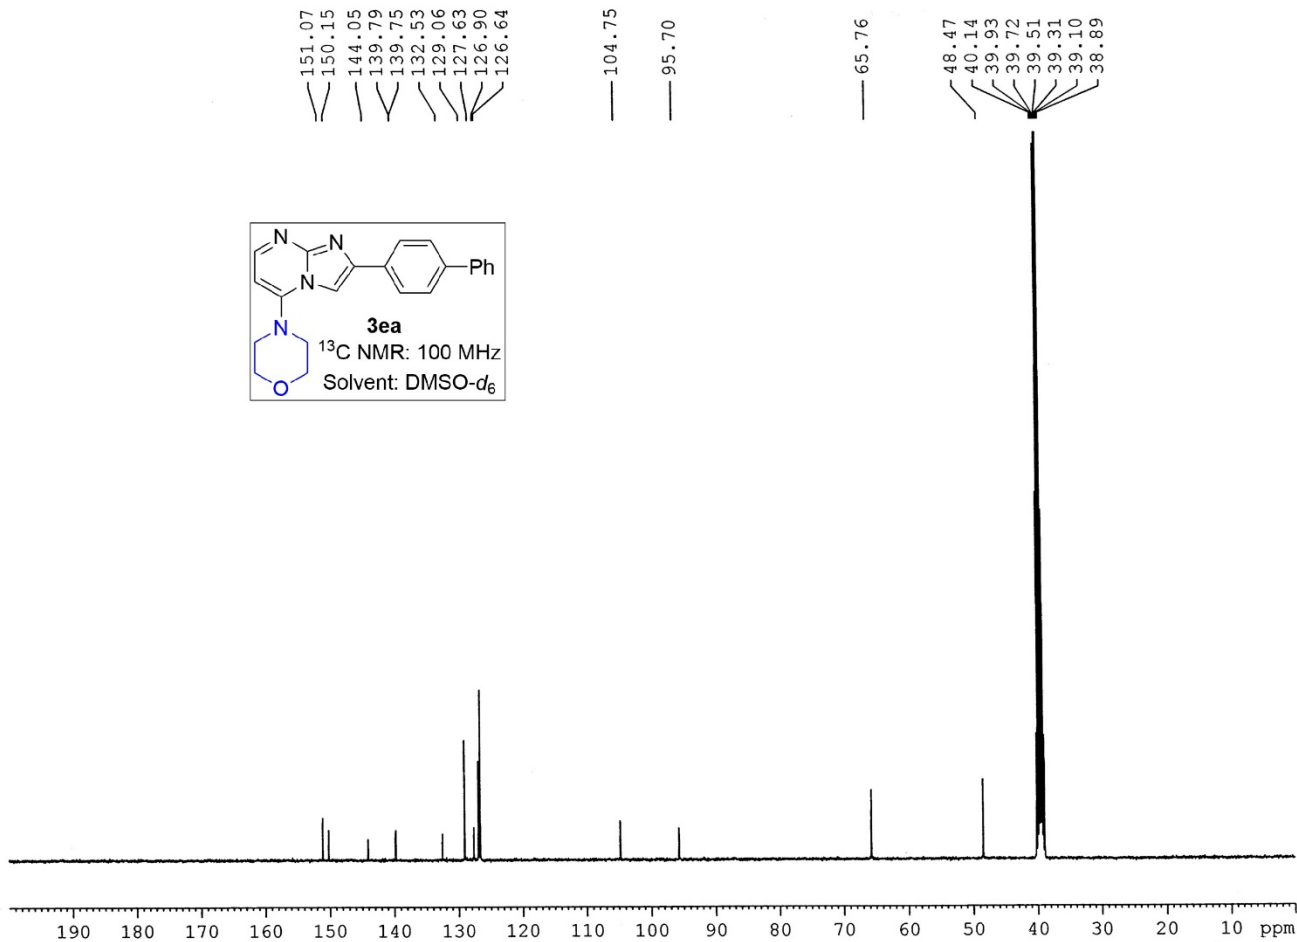

Current Data Parameters  
 NAME Dr. A HAJRA-2025-13C  
 EXPNO 383  
 PROCNO 1

F2 - Acquisition Parameters  
 Date\_ 20251108  
 Time 14.47  
 INSTRUM spect  
 PROBHD 5 mm PABBO BB/  
 PULPROG zgpg30  
 TD 32768  
 SOLVENT DMSO  
 NS 1500  
 DS 2  
 SWH 24038.461 Hz  
 FIDRES 0.733596 Hz  
 AQ 0.6815744 sec  
 RG 186.42  
 DW 20.800 usec  
 DE 6.50 usec  
 TE 290.8 K  
 D1 2.00000000 sec  
 D11 0.03000000 sec  
 TD0 1

===== CHANNEL f1 =====  
 SFO1 100.6278588 MHz  
 NUC1 13C  
 P1 8.90 usec  
 PLW1 54.0000000 W

===== CHANNEL f2 =====  
 SFO2 400.1516006 MHz  
 NUC2 1H  
 CPDPRG[2] waitz16  
 ECPD2 90.00 usec  
 PLW2 12.00000000 W  
 PLW12 0.32231000 W  
 PLW13 0.16212000 W

F2 - Processing parameters  
 SI 16384  
 SF 100.6178376 MHz  
 WDW EM  
 SSB 0  
 LB 1.00 Hz  
 GB 0  
 PC 1.40

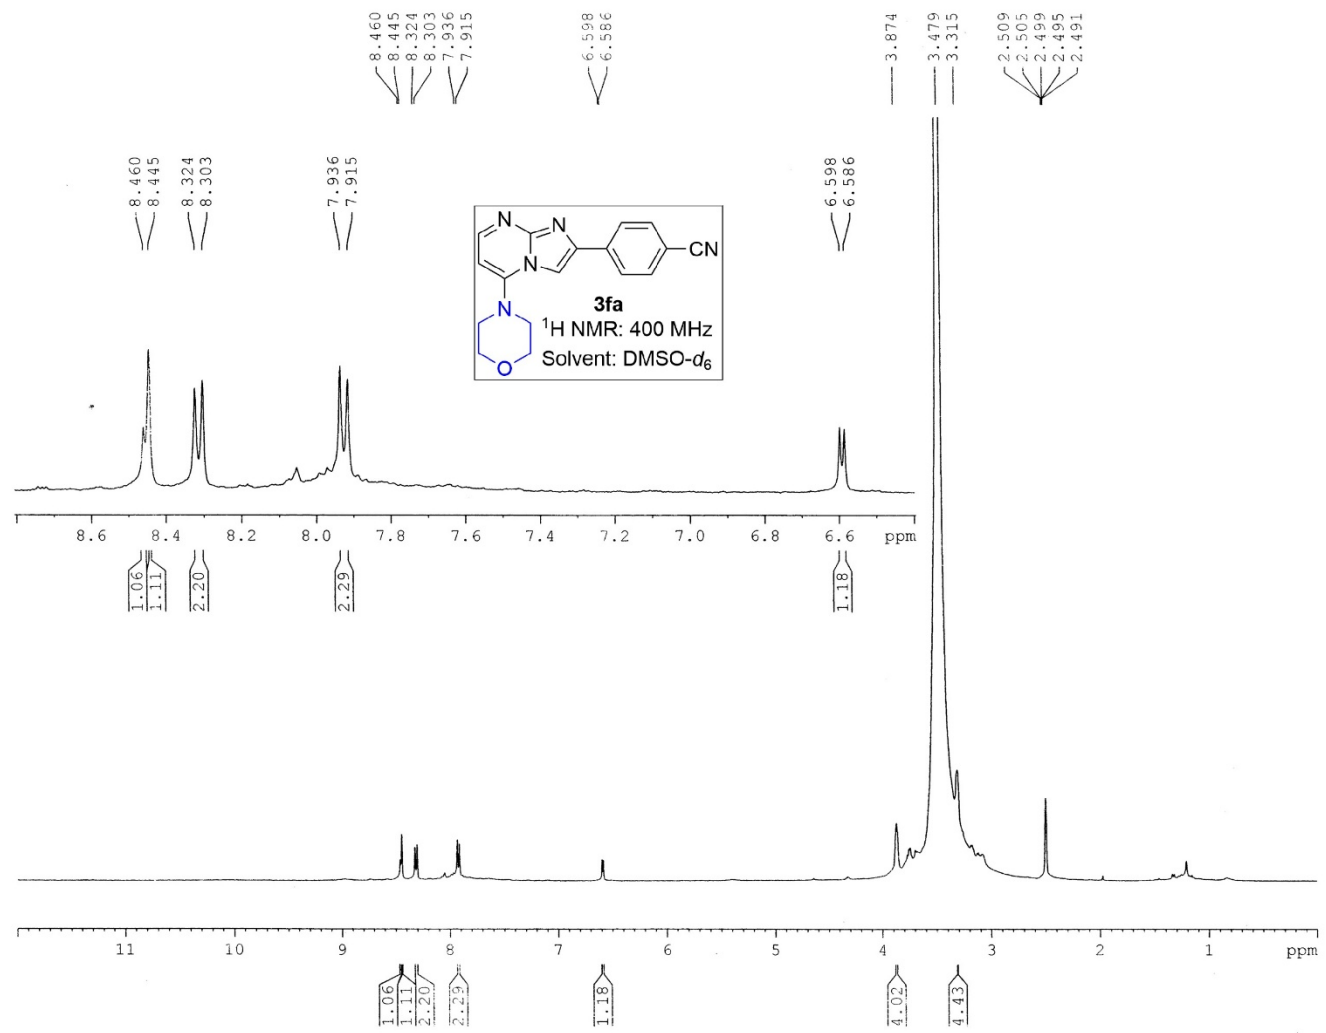

Current Data Parameters  
 NAME Dr. A HAJRA 2025 1H  
 EXPNO 325  
 PROCNO 1

F2 - Acquisition Parameters  
 Date\_ 20250618  
 Time\_ 18.10  
 INSTRUM spect  
 PROBHD 5 mm PABBO BB/  
 PULPROG zg30  
 TD 32768  
 SOLVENT DMSO  
 NS 8  
 DS 2  
 SWH 8223.685 Hz  
 FIDRES 0.250967 Hz  
 AQ 1.9922944 sec  
 RG 57.28  
 DW 60.800 usec  
 DE 6.50 usec  
 TE 292.1 K  
 D1 1.00000000 sec  
 TD0 1

==== CHANNEL f1 =====  
 SF01 400.1524711 MHz  
 NUC1 1H  
 P1 14.75 usec  
 PLW1 12.00000000 W

F2 - Processing parameters  
 SI 16384  
 SF 400.1500031 MHz  
 WDW EM  
 SSB 0  
 LB 0.30 Hz  
 GB 0  
 PC 1.00

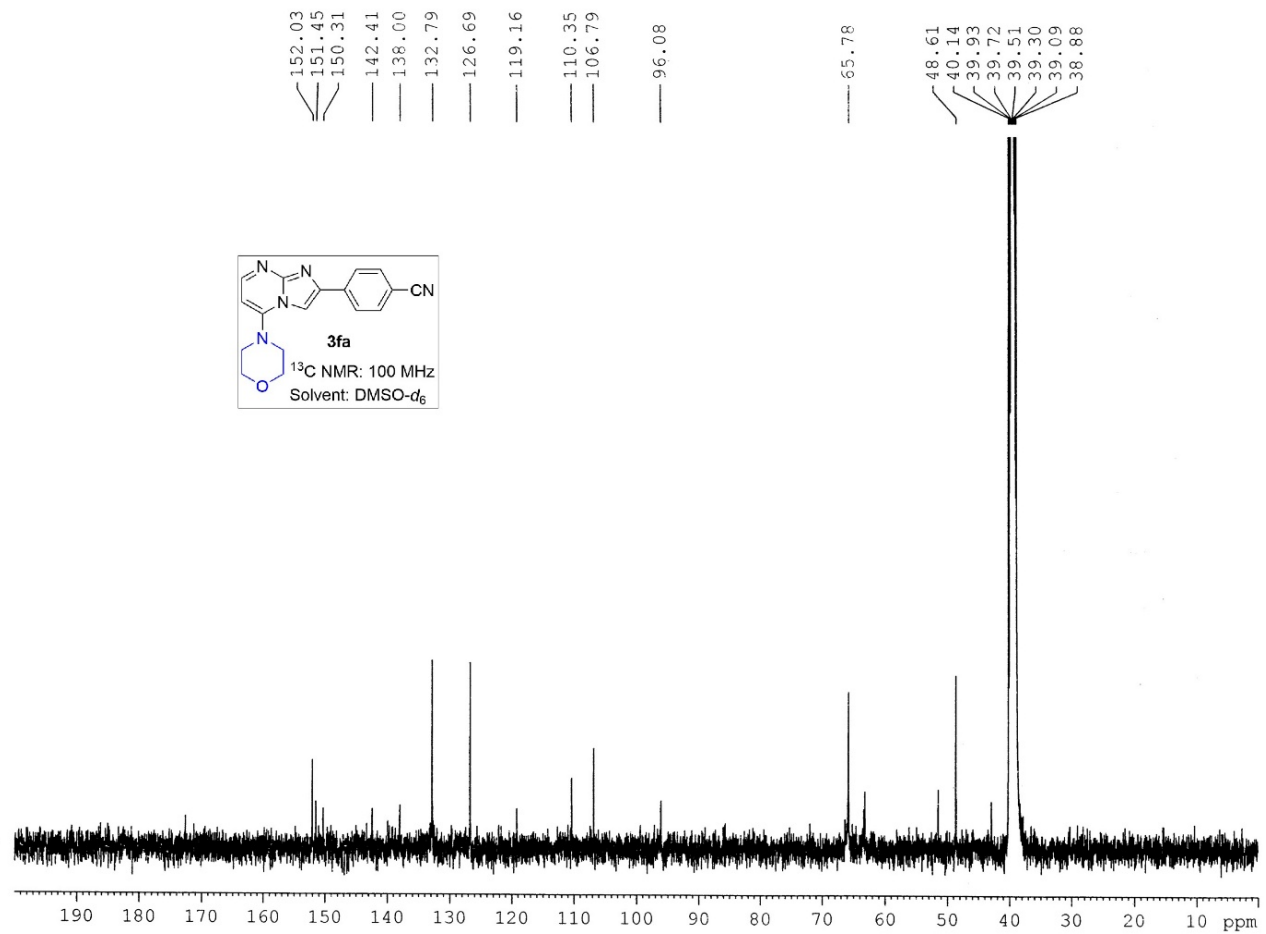

Current Data Parameters  
 NAME Dr. A HAJRA-2025-13C  
 EXPNO 198  
 PROCNO 1

F2 - Acquisition Parameters  
 Date 20250618  
 Time 19.36  
 INSTRUM spect  
 PROBHD 5 mm PABBO BB/  
 PULPROG zgpg30  
 TD 32768  
 SOLVENT DMSO  
 NS 1750  
 DS 2  
 SWH 24038.461 Hz  
 FIDRES 0.733596 Hz  
 AQ 0.6815744 sec  
 RG 186.42  
 DW 20.800 usec  
 DE 6.50 usec  
 TE 295.4 K  
 D1 2.0000000 sec  
 D11 0.6300000 sec  
 TDO 1

----- CHANNEL f1 -----  
 SFO1 100.6278588 MHz  
 NUC1 13C  
 P1 8.90 usec  
 PLW1 54.00000000 W

----- CHANNEL f2 -----  
 SFO2 400.1516006 MHz  
 NUC2 1H  
 CPDPRG[2] waltz16  
 PCPD2 90.00 usec  
 PLW2 12.00000000 W  
 PLW12 0.32231000 W  
 PLW13 0.16212000 W

F2 - Processing parameters  
 SI 16384  
 SF 100.6178302 MHz  
 WDWB EM  
 SSB 0  
 LB 1.00 Hz  
 GB 0  
 PC 1.40

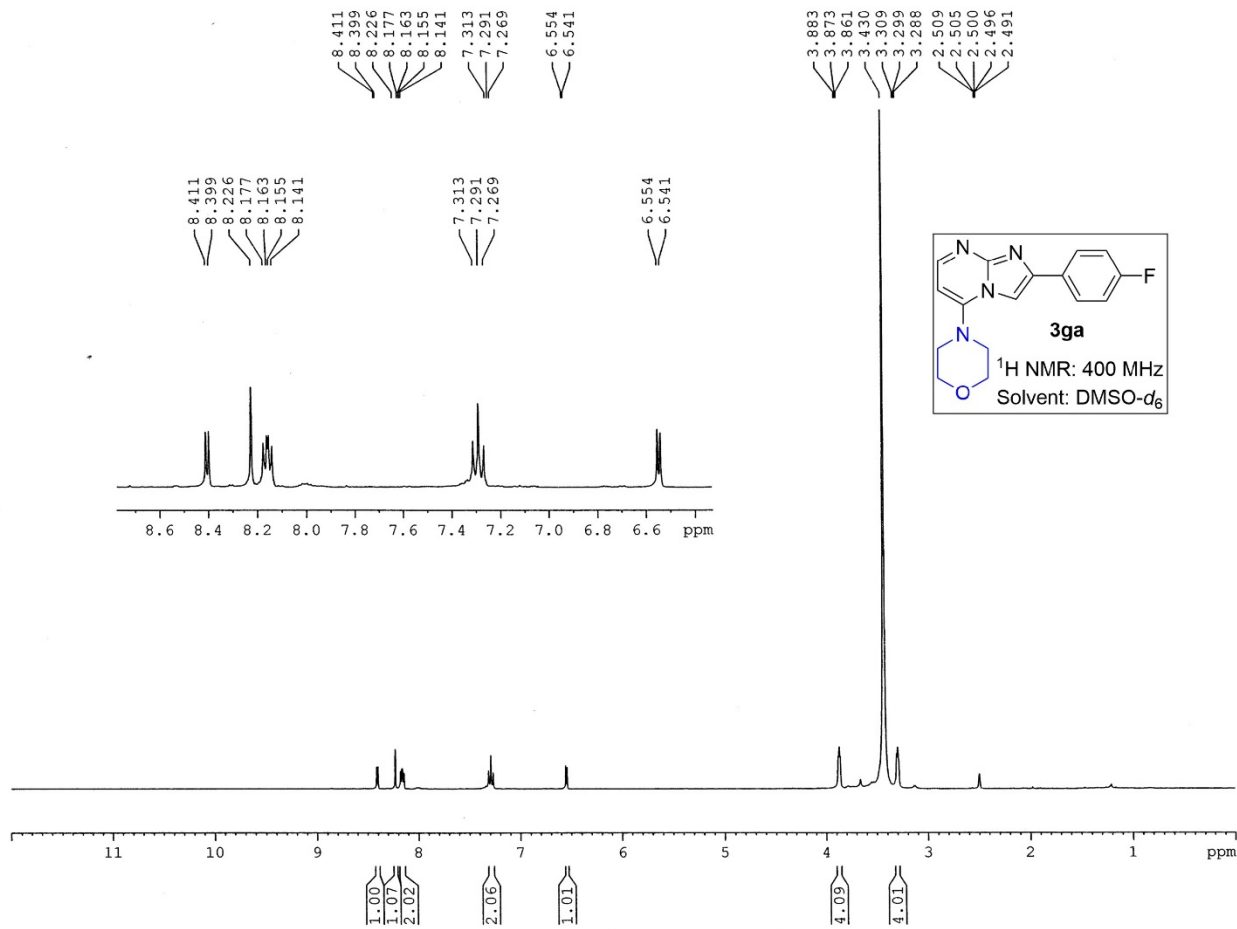

Current Data Parameters  
 NAME Dr. A HAJRA 2025 1H  
 EXPNO 322  
 PROCNO 1

F2 - Acquisition Parameters  
 Date\_ 20250617  
 Time 12.19  
 INSTRUM spect  
 PROBHD 5 mm PABBO BB/  
 PULPROG zg30  
 TD 32768  
 SOLVENT DMSO  
 NS 8  
 DS 2  
 SWH 8223.685 Hz  
 FIDRES 0.250967 Hz  
 AQ 1.9922944 sec  
 RG 62.69  
 DW 60.800 usec  
 DE 6.50 usec  
 TE 295.0 K  
 D1 1.00000000 sec  
 TDO 1

===== CHANNEL f1 =====  
 SF01 400.1524711 MHz  
 NUC1 1H  
 P1 14.75 usec  
 PLW1 12.00000000 W

F2 - Processing parameters  
 SI 16384  
 SF 400.1500031 MHz  
 WDW EM  
 SSB 0  
 LB 0.30 Hz  
 GB 0  
 PC 1.00

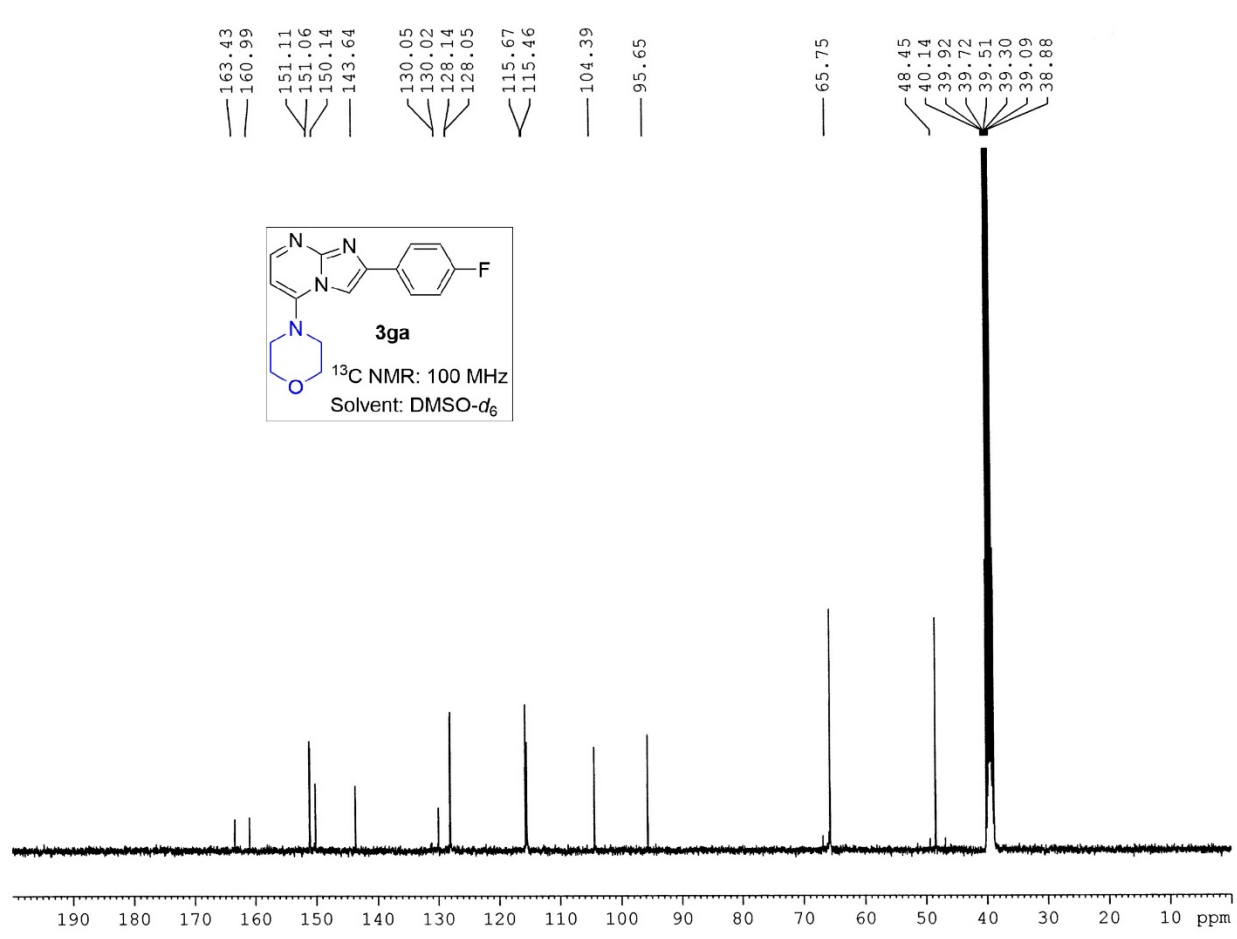

```

Current Data Parameters
NAME      Dr. A HAJRA-2025-13C
EXPNO    197
PROCNO   1

F2 - Acquisition Parameters
Date_    20250617
Time     13.40
INSTRUM  spect
PROBHD   5 mm PABBO BB/
PULPROG  zgpg30
TD       32768
SOLVENT  DMSO
NS       1650
DS       2
SWH      24038.461 Hz
FIDRES   0.733596 Hz
AQ       0.6815744 sec
RG       186.42
DW       20.800 usec
DE       6.50 usec
TE       294.8 K
D1       2.00000000 sec
D11      0.03000000 sec
TD0      1

----- CHANNEL f1 -----
SFO1    100.6278588 MHz
NUC1     13C
P1       8.90 usec
PLW1    54.00000000 W

----- CHANNEL f2 -----
SFO2    400.1516006 MHz
NUC2     1H
CPDPRG2  waltz16
PCPD2    90.00 usec
PLW2    12.00000000 W
ELW12   0.32231000 W
ELW13   0.16212000 W

F2 - Processing parameters
SI       16384
SF       100.6178361 MHz
WDW      EM
SSB      0
LB       1.00 Hz
GB       0
PC       1.40

```

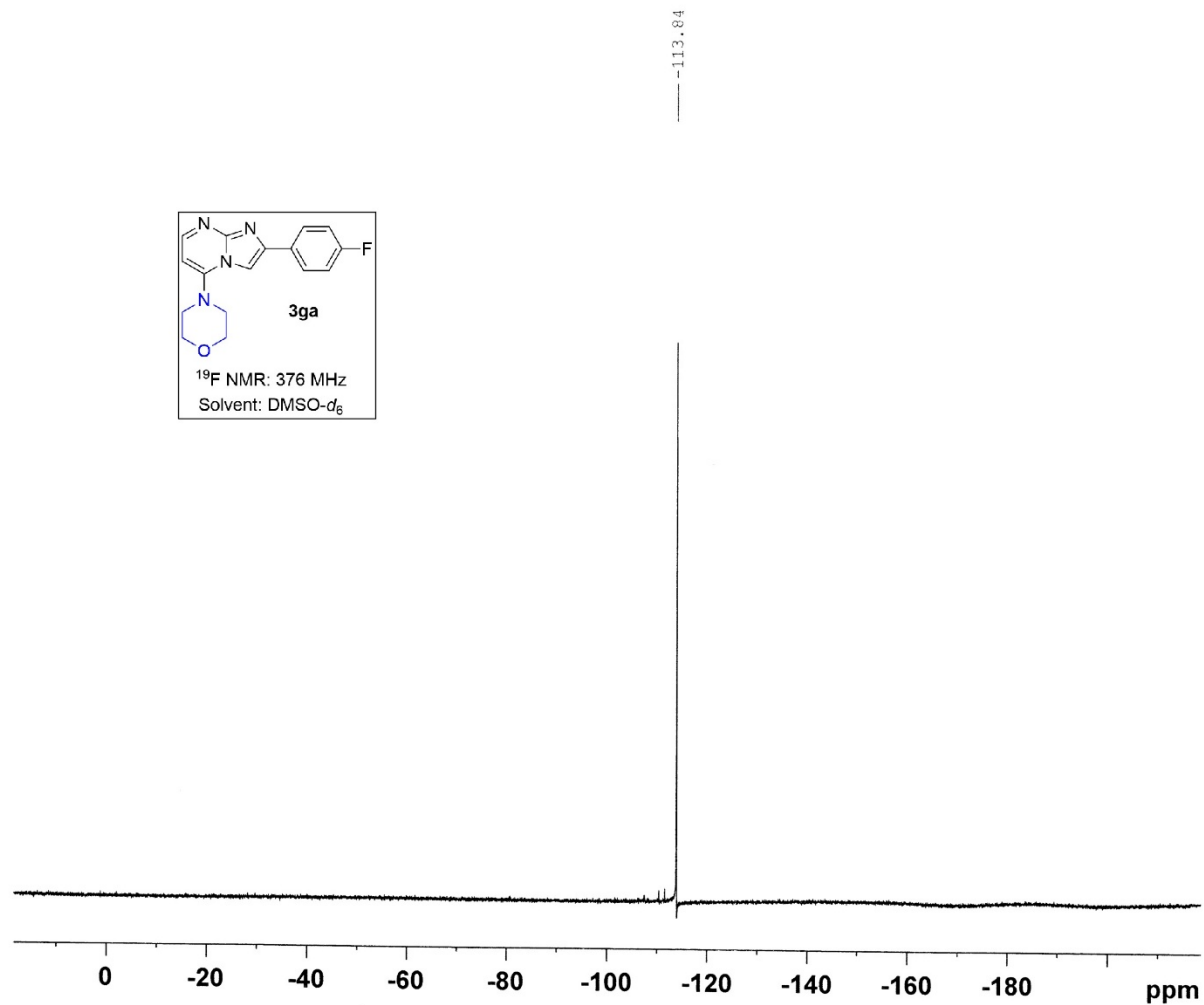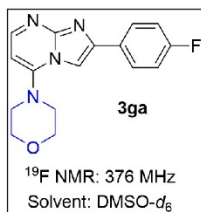

Current Data Parameters  
 NAME     Dr. A HAJRA 2025 1H  
 EXPNO     323  
 PROCNO    1

F2 - Acquisition Parameters  
 Date\_     20250617  
 Time      13.47  
 INSTRUM   spect  
 PROBHD    5 mm PABBO BB/  
 PULPROG   zgflqn  
 TD         32768  
 SOLVENT   DMSO  
 NS         8  
 DS         2  
 SWH        89285.711 Hz  
 FIDRES     2.724784 Hz  
 AQ         0.1835008 sec  
 RG         186.42  
 DW         5.600 usec  
 DE         6.50 usec  
 TE         294.2 K  
 D1         1.00000000 sec  
 TD0        1

===== CHANNEL f1 =====  
 SFO1       376.4795333 MHz  
 NUC1       19F  
 P1         12.50 usec  
 PLW1       20.00000000 W

F2 - Processing parameters  
 SI         16384  
 SF         376.5171850 MHz  
 WDW       EM  
 SSB        0  
 LB         0.30 Hz  
 GB         0  
 PC         1.00

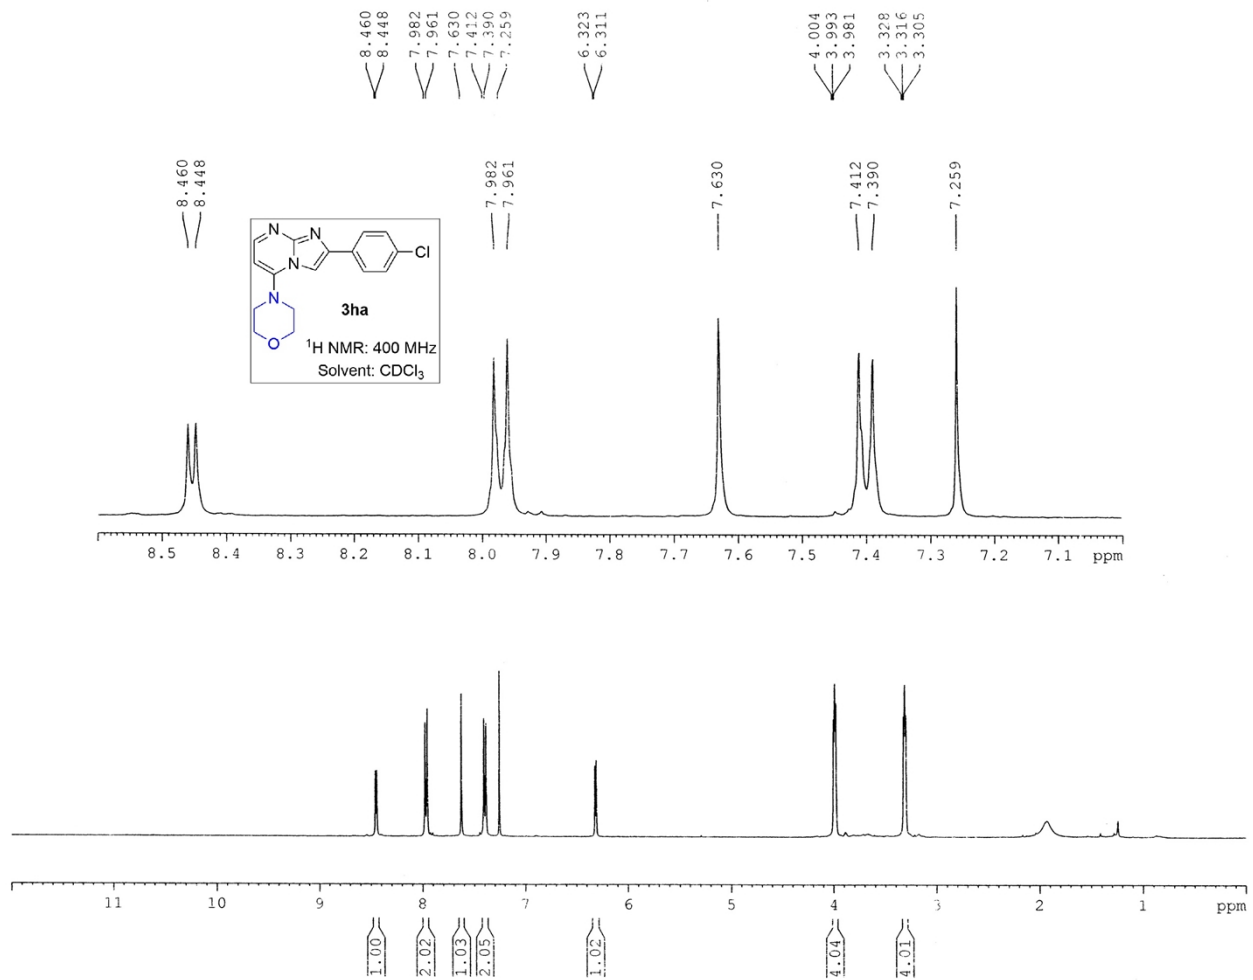

Current Data Parameters  
 NAME Dr. A HAJRA 2026 1H  
 EXPNO 24  
 PROCNO 1

F2 - Acquisition Parameters  
 Date\_ 20260117  
 Time 16.45  
 INSTRUM spect  
 PROBHD 5 mm PABBO BB/  
 PULPROG zg30  
 TD 32768  
 SOLVENT CDCl3  
 NS 8  
 DS 2  
 SWH 8223.685 Hz  
 FIDRES 0.250967 Hz  
 AQ 1.992294 sec  
 RG 135.7  
 DW 60.800 usec  
 DE 6.50 usec  
 TE 292.5 K  
 D1 1.0000000 sec  
 TD0 1

===== CHANNEL f1 =====  
 SFO1 400.1524711 MHz  
 NUC1 1H  
 P1 14.75 usec  
 PLW1 12.0000000 W

F2 - Processing parameters  
 SI 16384  
 SF 400.1500097 MHz  
 WDW EM  
 SSB 0  
 LB 0.30 Hz  
 GB 0  
 PC 1.00

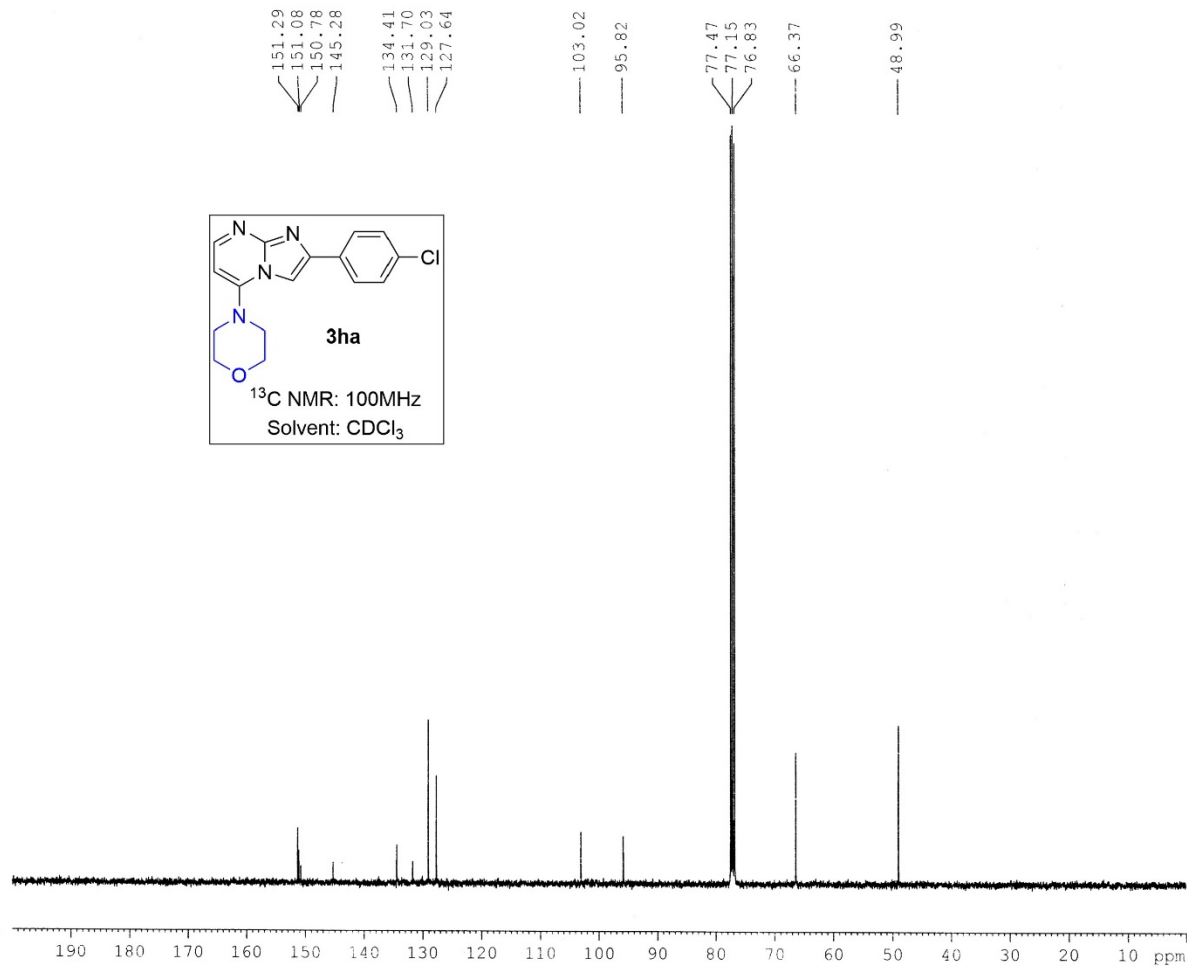

Current Data Parameters  
 NAME Dr. A HAJRA-2026-13C  
 EXPNO 14  
 PROCNO 1

F2 - Acquisition Parameters  
 Date\_ 20260117  
 Time 17.45  
 INSTRUM spect  
 PROBHD 5 mm PABBO BB/  
 PULPROG zgpg30  
 TD 32768  
 SOLVENT CDC13  
 NS 1200  
 DS 2  
 SWH 24038.461 Hz  
 FIDRES 0.733596 Hz  
 AQ 0.6815744 sec  
 RG 186.42  
 IW 20.800 usec  
 DE 6.50 usec  
 TE 289.6 K  
 B1 2.0000000 sec  
 D1 0.0300000 sec  
 FIDC 1

----- CHANNEL f1 -----  
 SFO1 100.6278588 MHz  
 NUC1 13C  
 P1 6.90 usec  
 PLW1 54.0000000 W

----- CHANNEL f2 -----  
 SFO2 400.1516006 MHz  
 NUC2 1H  
 CPDPRG2 waltz16  
 PCPD2 90.00 usec  
 PLW2 12.0000000 W  
 PLW12 0.32231000 W  
 PLW13 0.16212000 W

F2 - Processing parameters  
 SI 16384  
 SF 100.6177873 MHz  
 WDW EM  
 SSB 0  
 LB 1.00 Hz  
 GB 0  
 PC 1.40

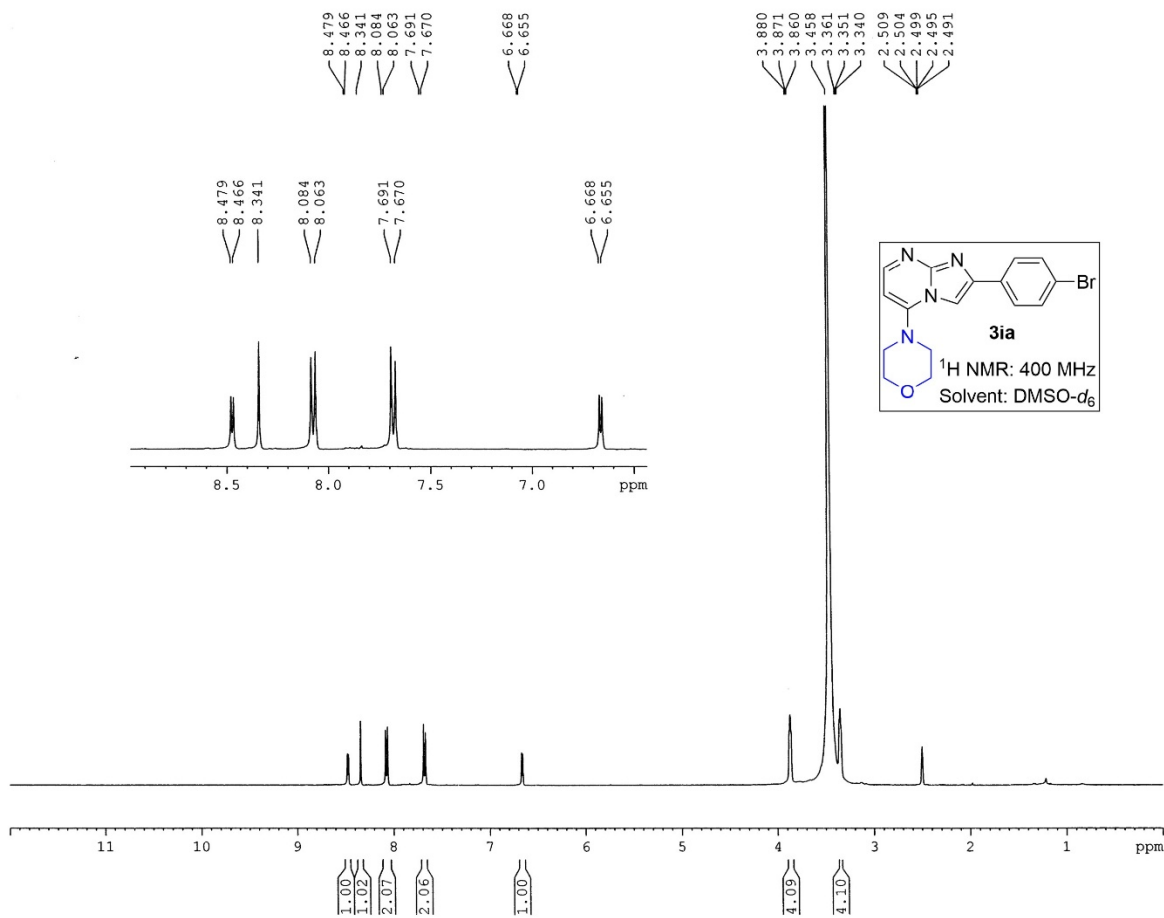

Current Data Parameters  
 NAME Dr. A HAJRA 2025 1H  
 EXPNO 320  
 PROCNO 1

F2 - Acquisition Parameters  
 Date\_ 20250615  
 Time\_ 11.39  
 INSTRUM spect  
 PROBHD 5 mm PABBO BB/  
 PULPROG zg30  
 TD 32768  
 SOLVENT DMSO  
 NS 8  
 DS 2  
 SWH 8223.685 Hz  
 FIDRES 0.250967 Hz  
 AQ 1.9922944 sec  
 RG 62.69  
 DW 60.800 usec  
 DE 6.50 usec  
 TE 296.9 K  
 D1 1.00000000 sec  
 TD0 1

===== CHANNEL f1 =====  
 SF01 400.1524711 MHz  
 NUC1 1H  
 P1 14.75 usec  
 PLW1 12.00000000 W

F2 - Processing parameters  
 SI 16384  
 SF 400.1500030 MHz  
 WDW EM  
 SSB 0  
 LB 0.30 Hz  
 GB 0  
 PC 1.00

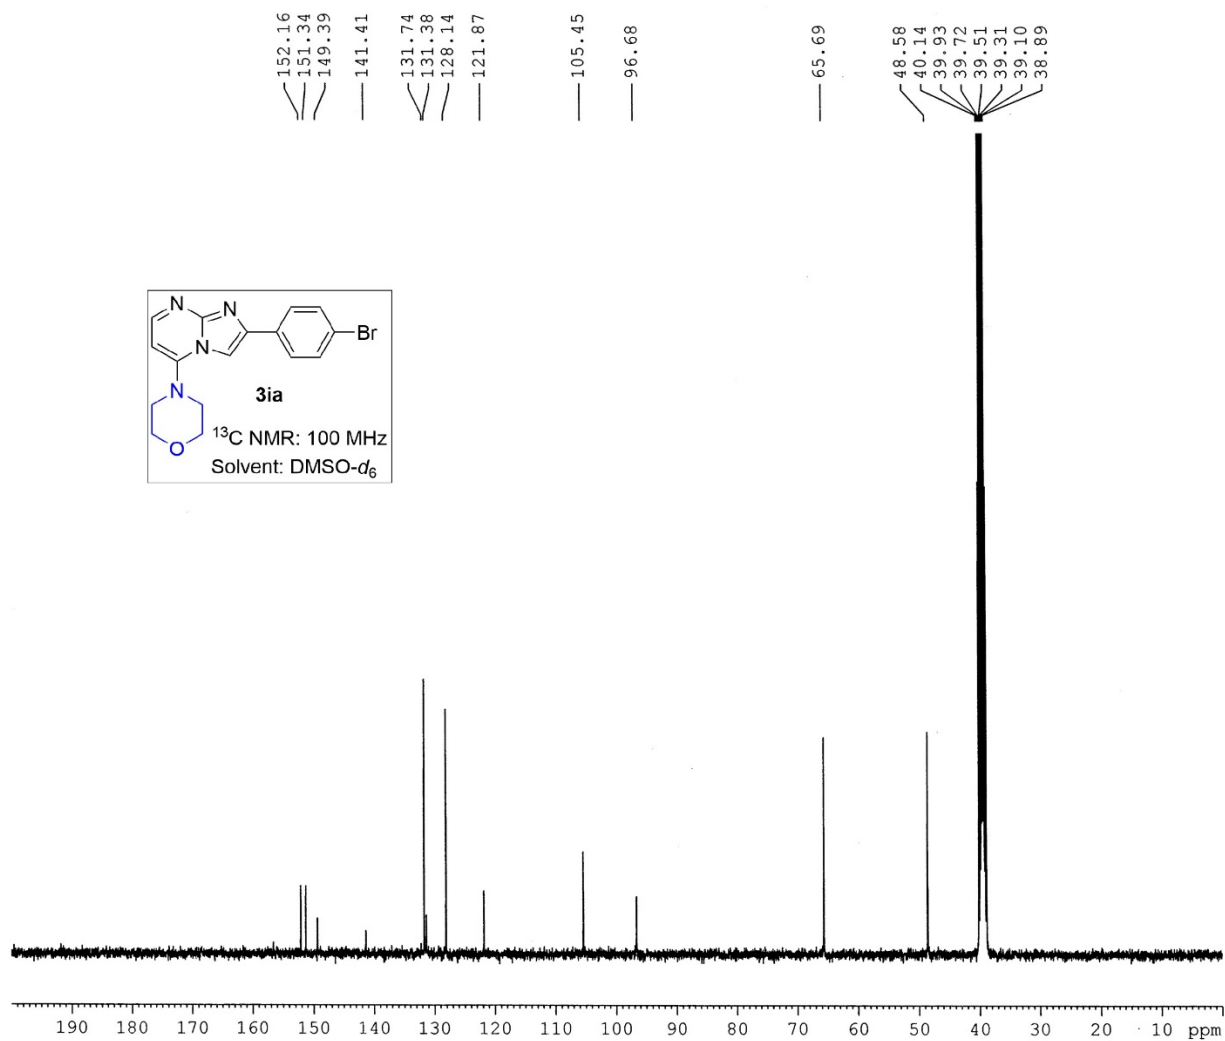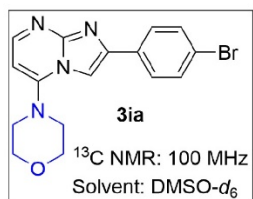

Current Data Parameters  
 NAME Dr. A HAJRA-2025-13C  
 EXPNO 195  
 PROCNO 1

F2 - Acquisition Parameters  
 Date\_ 20250615  
 Time 13.07  
 INSTRUM spect  
 FROBHD 5 mm PABBO BB/  
 PULPROG zgpg30  
 TD 32768  
 SOLVENT DMSO  
 NS 1800  
 DS 2  
 SWH 24038.461 Hz  
 FIDRES 0.733596 Hz  
 AQ 0.6815744 sec  
 RG 186.42  
 DW 20.800 usec  
 DE 6.50 usec  
 TE 297.2 K  
 D1 2.00000000 sec  
 D11 0.03000000 sec  
 TD0 1

===== CHANNEL f1 =====  
 SFO1 100.6278588 MHz  
 NUC1 13C  
 P1 8.90 usec  
 PLW1 54.00000000 W

===== CHANNEL f2 =====  
 SFO2 400.1516006 MHz  
 NUC2 1H  
 CPDPRG[2] waltz16  
 PCPD2 90.00 usec  
 PLW2 12.00000000 W  
 PLW12 0.32231000 W  
 PLW13 0.16212000 W

F2 - Processing parameters  
 SI 16384  
 SF 100.6178376 MHz  
 WDW EM  
 SSB 0  
 LB 1.00 Hz  
 GB 0  
 PC 1.40

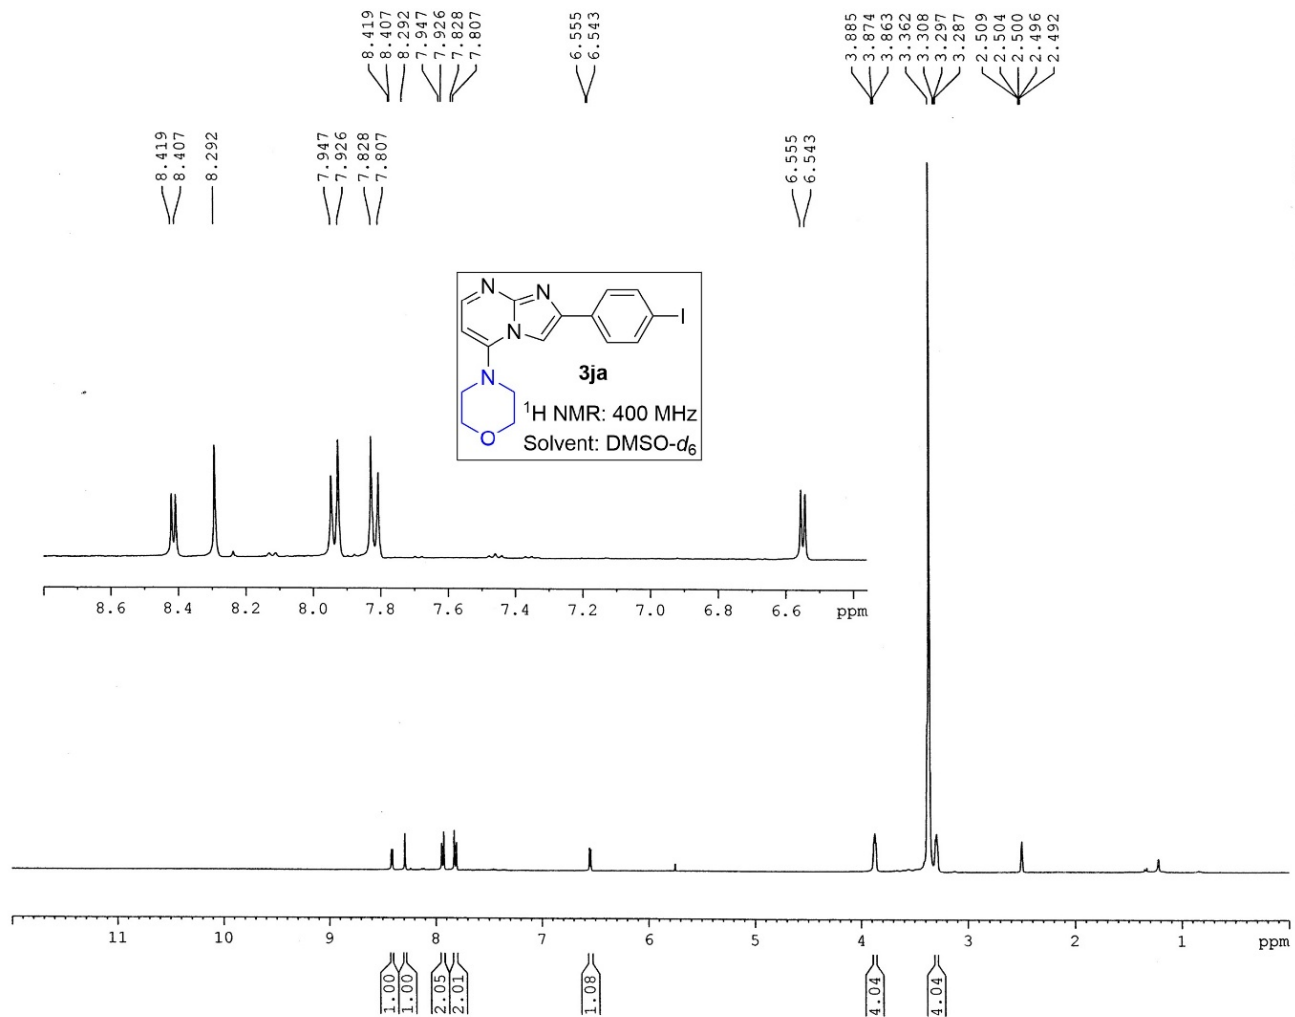

Current Data Parameters  
 NAME Dr. A HAJRA 2025 1H  
 EXPNO 361  
 PROCNO 1

F2 - Acquisition Parameters  
 Date\_ 20250629  
 Time\_ 11.16  
 INSTRUM spect  
 PROBHD 5 mm PABBO BB/  
 PULPROG zg30  
 TD 32768  
 SOLVENT DMSO  
 NS 8  
 DS 2  
 SWH 8223.685 Hz  
 FIDRES 0.250967 Hz  
 AQ 1.9922944 sec  
 RG 135.7  
 DW 60.800 usec  
 DE 6.50 usec  
 TE 296.0 K  
 D1 1.00000000 sec  
 TDO 1

===== CHANNEL f1 =====  
 SFO1 400.1524711 MHz  
 NUC1 1H  
 P1 14.75 usec  
 PLW1 12.00000000 W

F2 - Processing parameters  
 SI 16384  
 SF 400.1500031 MHz  
 WDW EM  
 SSB 0  
 LB 0.30 Hz  
 GB 0  
 PC 1.00

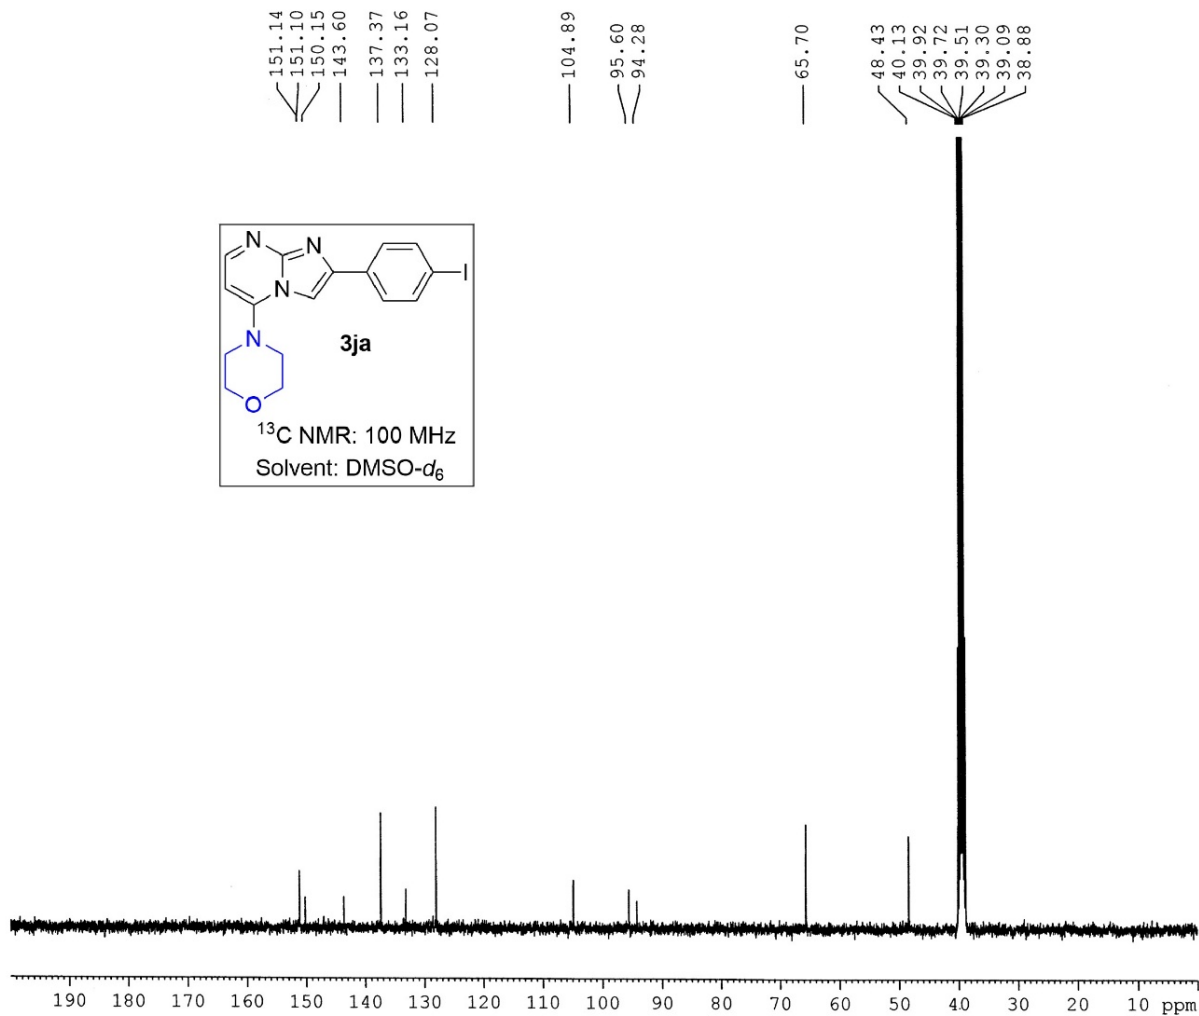

Current Data Parameters  
 NAME Dr. A HAJRA-2025-13C  
 EXPNO 206  
 PROCNO 1

F2 - Acquisition Parameters  
 Date\_ 20250629  
 Time 11.54  
 INSTRUM spect  
 PROBHD 5 mm PABBO BB/  
 PULPROG zgpg30  
 TD 32768  
 SOLVENT DMSO  
 NS 700  
 DS 2  
 SWH 24038.461 Hz  
 FIDRES 0.733596 Hz  
 AQ 0.6815744 sec  
 RG 186.42  
 DW 20.800 usec  
 DE 6.50 usec  
 TE 295.7 K  
 D1 2.00000000 sec  
 D11 0.03000000 sec  
 TD0 1

===== CHANNEL f1 =====  
 SFO1 100.6278588 MHz  
 NUC1 13C  
 P1 8.90 usec  
 PLW1 54.00000000 W

===== CHANNEL f2 =====  
 SFO2 400.1516006 MHz  
 NUC2 1H  
 CPDPRG[2] waltz16  
 PCPD2 90.00 usec  
 PLW2 12.00000000 W  
 PLW12 0.32231000 W  
 PLW13 0.16212000 W

F2 - Processing parameters  
 SI 16384  
 SF 100.6178419 MHz  
 WDW EM  
 SSB 0  
 LB 1.00 Hz  
 GB 0  
 PC 1.40

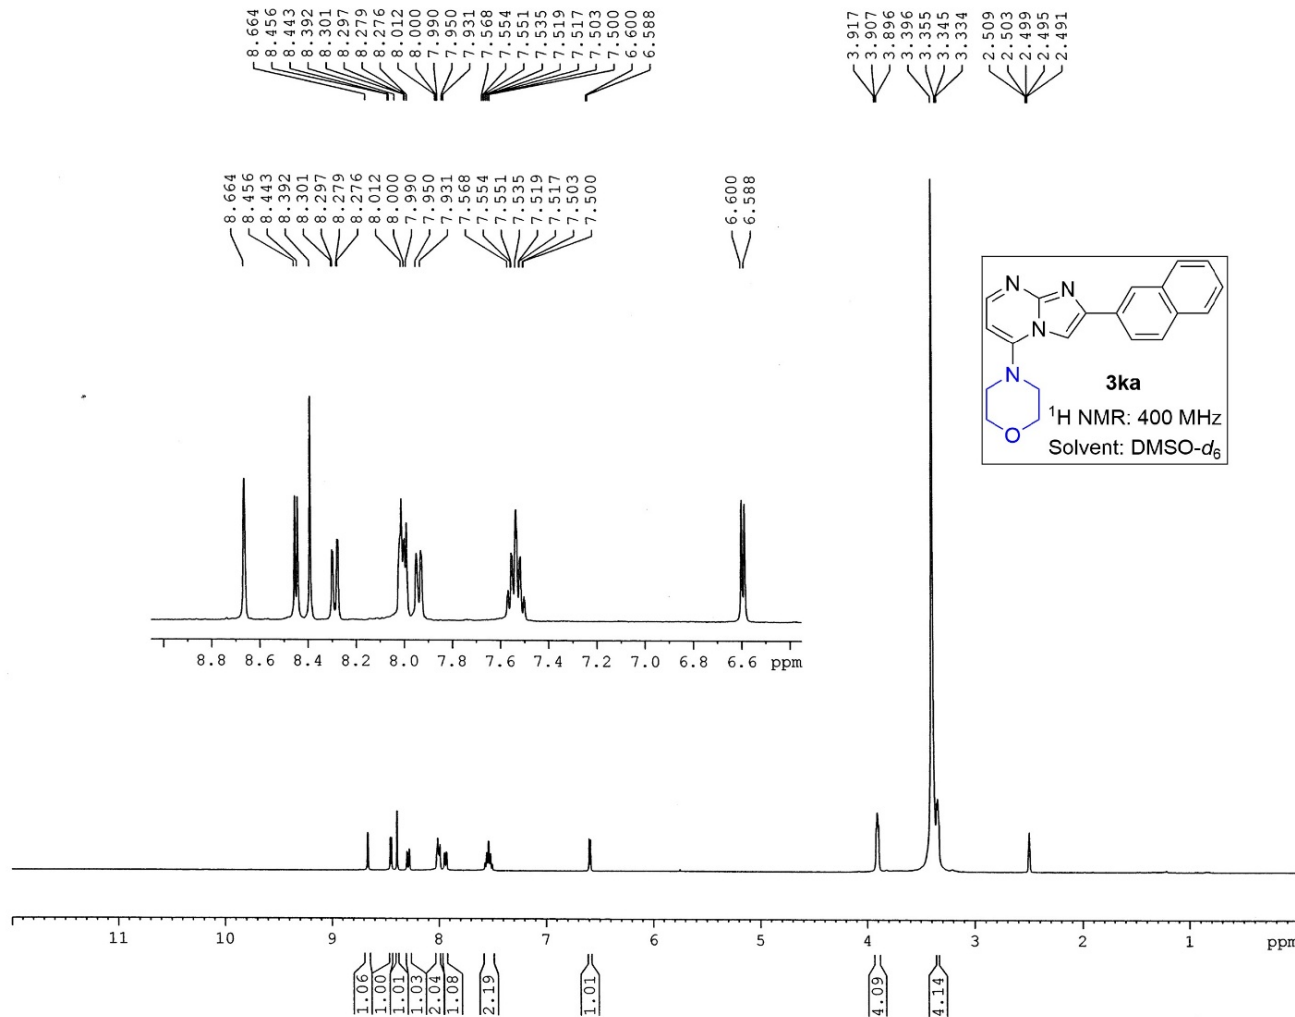

Current Data Parameters  
 NAME Dr. A HAJRA 2025 1H  
 EXPNO 362  
 PROCNO 1

F2 - Acquisition Parameters  
 Date\_ 20250629  
 Time 13.02  
 INSTRUM spect  
 PROBHD 5 mm PABBO BB/  
 PULPROG zg30  
 TD 32768  
 SOLVENT DMSO  
 NS 8  
 DS 2  
 SWH 8223.685 Hz  
 FIDRES 0.250967 Hz  
 AQ 1.9922944 sec  
 RG 135.7  
 DW 60.800 usec  
 DE 6.50 usec  
 TE 294.6 K  
 D1 1.0000000 sec  
 TD0 1

==== CHANNEL f1 =====  
 SF01 400.1524711 MHz  
 NUC1 1H  
 P1 14.75 usec  
 PLW1 12.00000000 W

F2 - Processing parameters  
 SI 16384  
 SF 400.1500035 MHz  
 WDW EM  
 SSB 0  
 LB 0.30 Hz  
 GB 0  
 PC 1.00

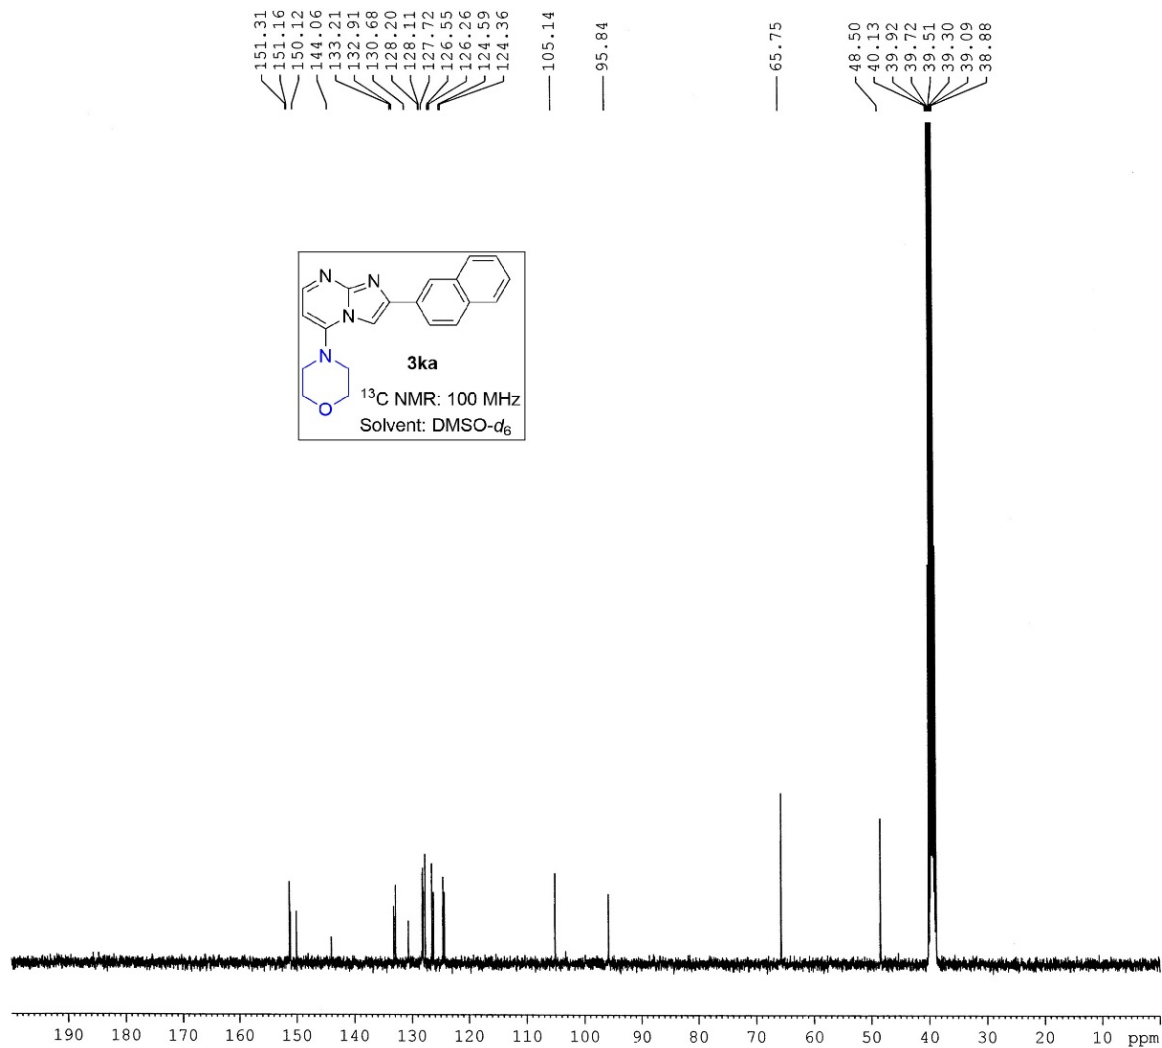

Current Data Parameters  
 NAME Dr. A HAJRA-2025-13C  
 EXPNO 207  
 PROCNO 1

F2 - Acquisition Parameters  
 Date\_ 20250629  
 Time 14.06  
 INSTRUM spect  
 PROBHD 5 mm PABBO BB/  
 PULPROG zgpg30  
 TD 32768  
 SOLVENT DMSO  
 NS 1300  
 DS 2  
 SWH 24038.461 Hz  
 FIDRES 0.733596 Hz  
 AQ 0.6815744 sec  
 RG 186.42  
 DW 20.800 usec  
 DE 6.50 usec  
 TE 294.4 K  
 D1 2.0000000 sec  
 D11 0.0300000 sec  
 TDO 1

===== CHANNEL f1 =====  
 SFO1 100.6278588 MHz  
 NUC1 13C  
 F1 8.90 usec  
 PLW1 54.0000000 W

===== CHANNEL f2 =====  
 SFO2 400.1516006 MHz  
 NUC2 1H  
 CPDPRG[2] waltz16  
 PCPD2 90.00 usec  
 PLW2 12.0000000 W  
 PLW12 0.32231000 W  
 PLW13 0.16212000 W

F2 - Processing parameters  
 SI 16384  
 SF 100.6178405 MHz  
 WDW EM  
 SSB 0  
 LB 1.00 Hz  
 GB 0  
 PC 1.40

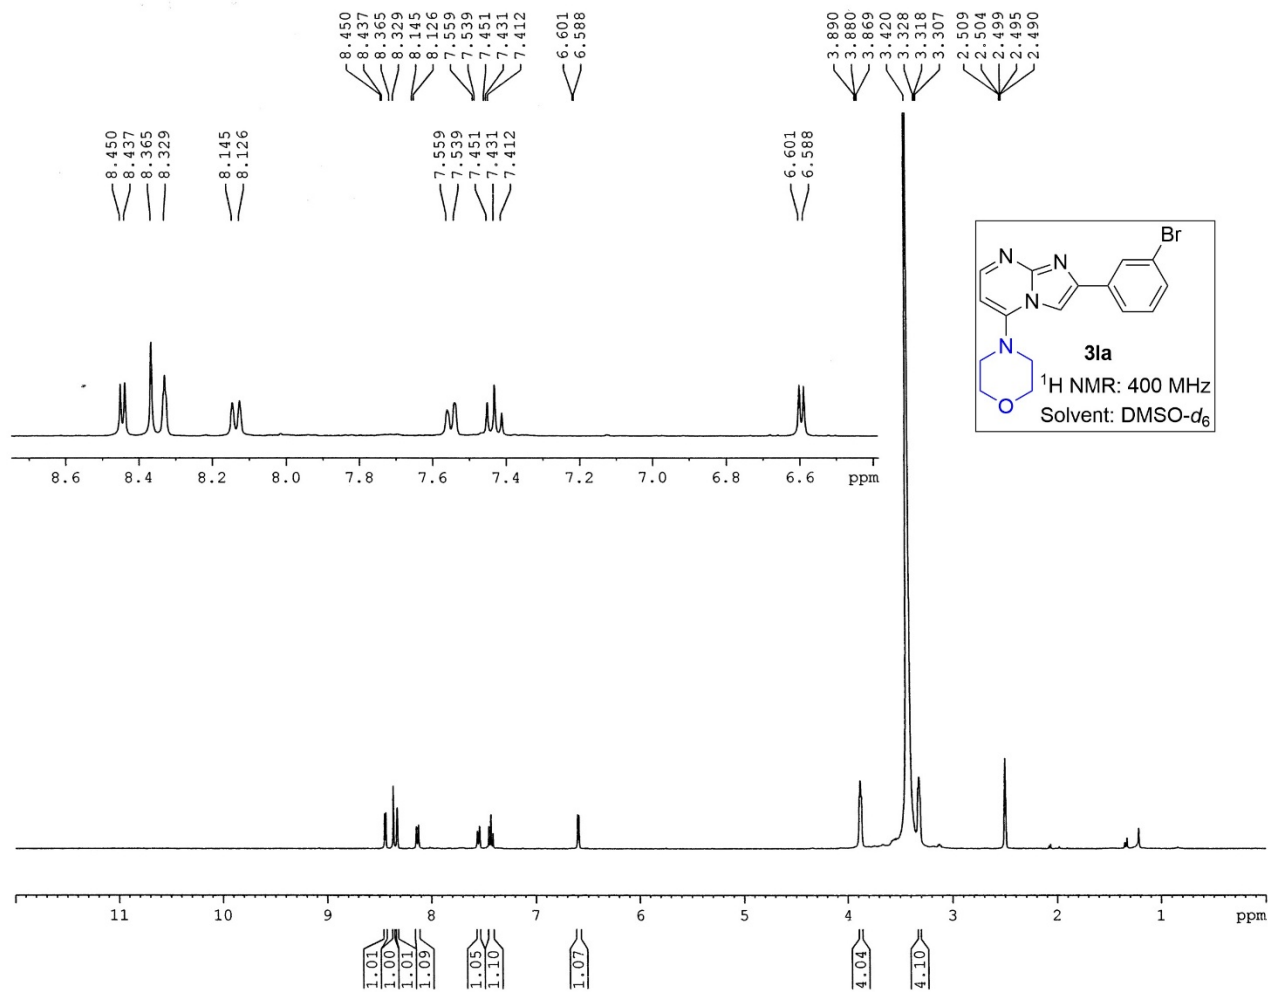

Current Data Parameters  
 NAME Dr. A HAJRA 2025 1H  
 EXPNO 615  
 PROCNO 1

F2 - Acquisition Parameters  
 Date\_ 20251019  
 Time\_ 11.58  
 INSTRUM spect  
 PROBHD 5 mm PABBO BB/  
 PULPROG zg30  
 TD 32768  
 SOLVENT DMSO  
 NS 8  
 DS 2  
 SWH 8223.685 Hz  
 FIDRES 0.250967 Hz  
 AQ 1.9922944 sec  
 RG 106.66  
 DW 60.800 usec  
 DE 6.50 usec  
 TE 292.6 K  
 D1 1.0000000 sec  
 TD0 1

===== CHANNEL f1 =====  
 SFO1 400.1524711 MHz  
 NUC1 1H  
 P1 14.75 usec  
 PLW1 12.0000000 W

F2 - Processing parameters  
 SI 16384  
 SF 400.1500030 MHz  
 WDW EM  
 SSB 0  
 LB 0.30 Hz  
 GB 0  
 PC 1.00

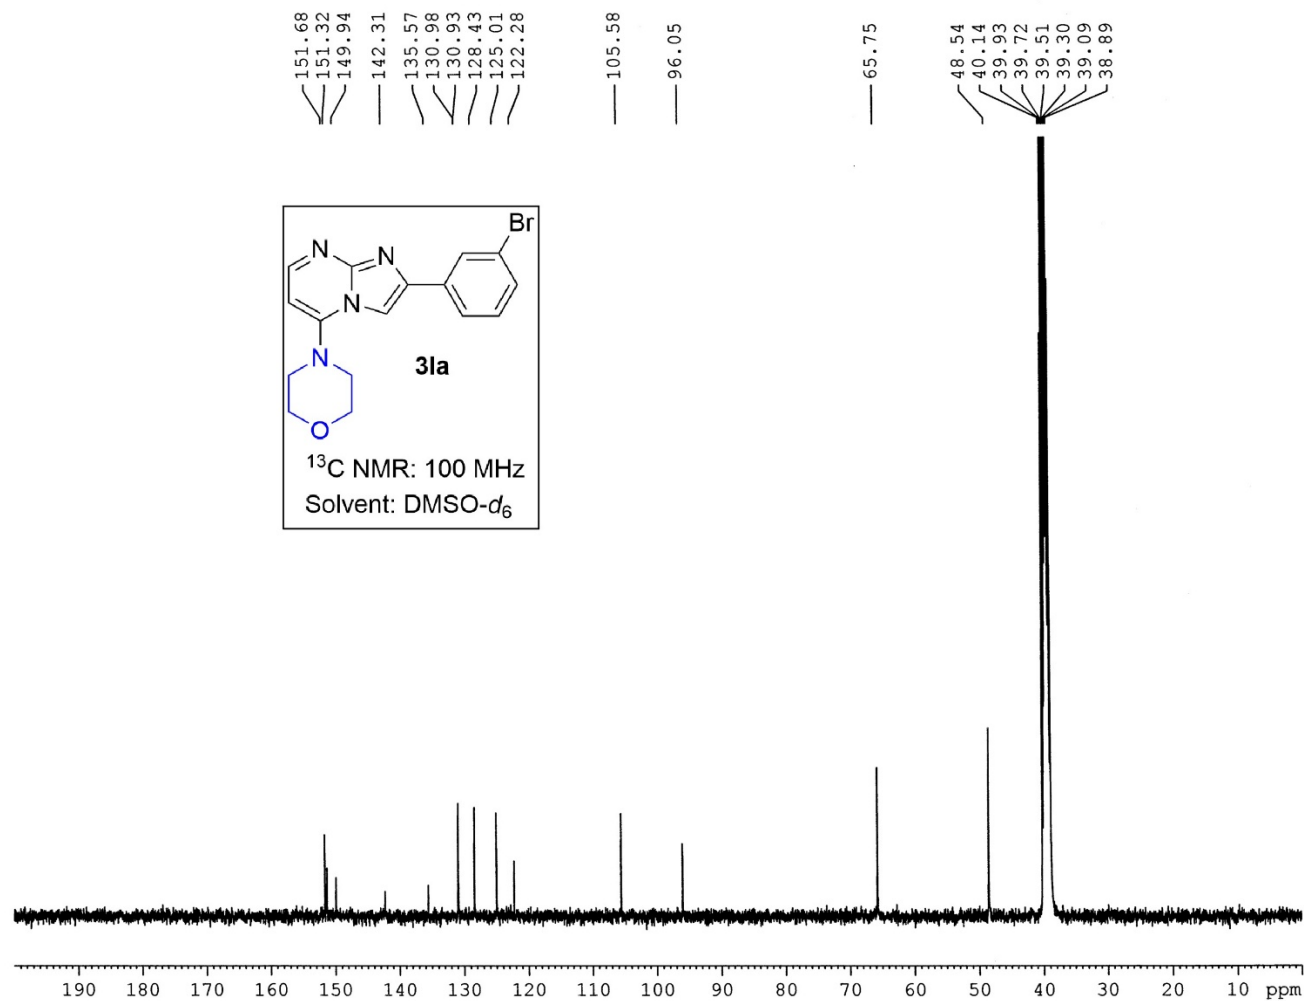

Current Data Parameters  
 NAME Dr. A HAJRA-2025-13C  
 EXPNO 350  
 PROCNO 1

F2 - Acquisition Parameters  
 Date\_ 20251019  
 Time 15.17  
 INSTRUM spect  
 PROBHD 5 mm PABBO BB/  
 PULPROG zgpg30  
 TD 32768  
 SOLVENT DMSO  
 NS 1900  
 DS 2  
 SWH 24038.461 Hz  
 FIDRES 0.733596 Hz  
 AQ 0.6815744 sec  
 RG 186.42  
 DW 20.800 usec  
 DE 6.50 usec  
 TE 293.5 K  
 D1 2.00000000 sec  
 D11 0.03000000 sec  
 TD0 1

===== CHANNEL f1 =====  
 SFO1 100.6278588 MHz  
 NUC1 13C  
 P1 8.90 usec  
 PLW1 54.00000000 W

===== CHANNEL f2 =====  
 SFO2 400.1516006 MHz  
 NUC2 1H  
 CPDPRG[2] waltz16  
 PCPD2 90.00 usec  
 PLW2 12.00000000 W  
 PLW12 0.32231000 W  
 PLW13 0.16212000 W

F2 - Processing parameters  
 SI 16384  
 SF 100.6178361 MHz  
 WDW EM  
 SSB 0  
 LB 1.00 Hz  
 GB 0  
 PC 1.40

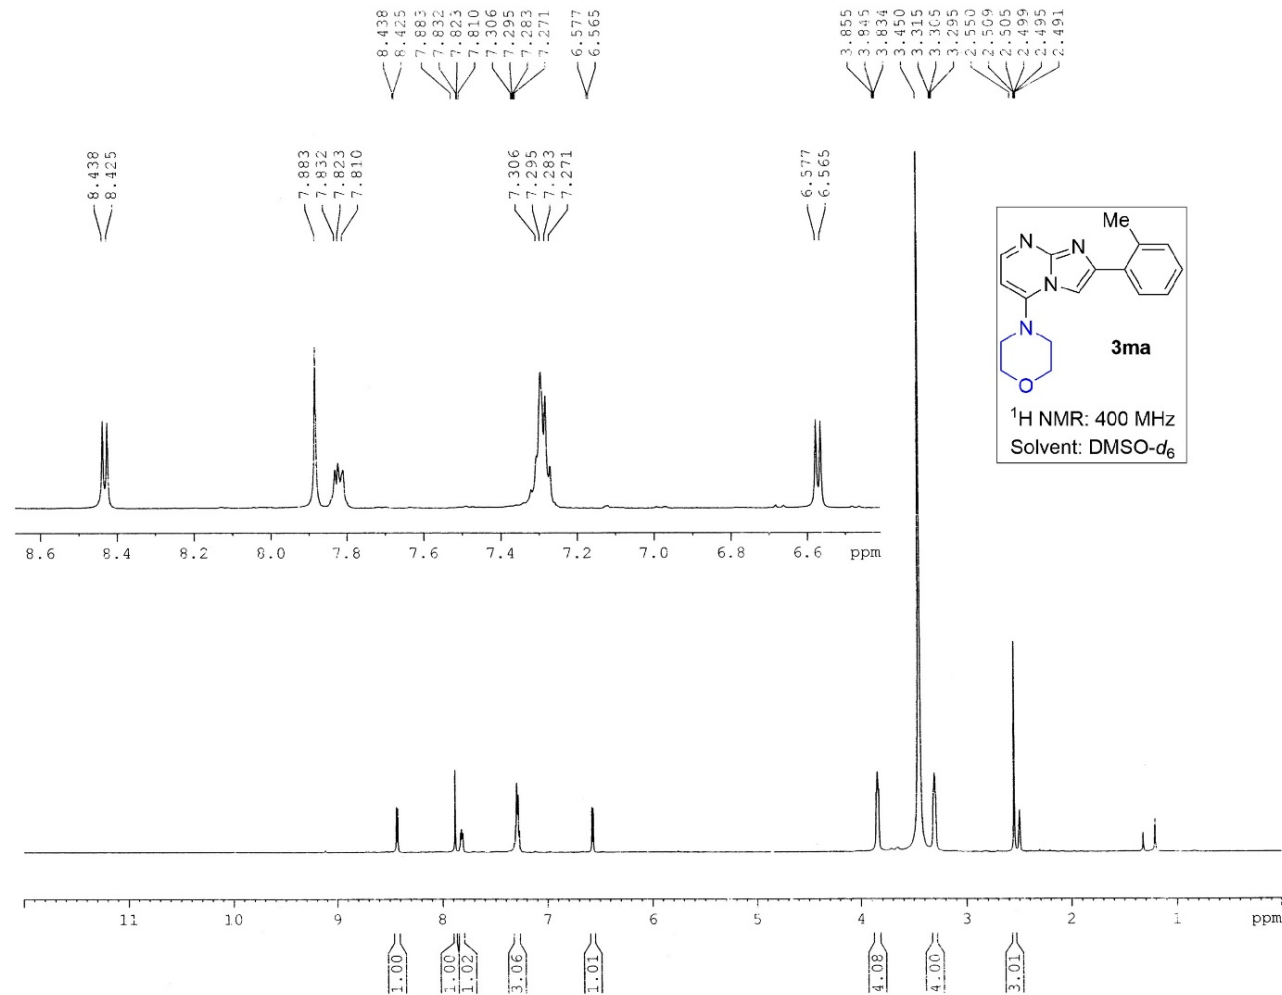

Current Data Parameters  
 NAME Dr. A HAJRA 2025 1H  
 EXPNO 692  
 PROCNO 1

F2 - Acquisition Parameters  
 Date\_ 20251126  
 Time\_ 12.22  
 INSTRUM spect  
 PROBHD 5 mm PABBO BB/  
 PULPROG zg30  
 TD 32768  
 SOLVENT DMSO  
 NS 8  
 DS 2  
 SWH 8223.685 Hz  
 FIDRES 0.250967 Hz  
 AQ 1.9922944 sec  
 RG 57.28  
 DW 60.800 usec  
 DE 6.50 usec  
 TE 287.4 K  
 D1 1.00000000 sec  
 TD0 1

===== CHANNEL f1 =====  
 SFO1 400.1524711 MHz  
 NUC1 1H  
 P1 14.75 usec  
 PLW1 12.00000000 W

F2 - Processing parameters  
 SI 16384  
 SF 400.1500026 MHz  
 WDW EM  
 SSB 0  
 LB 0.30 Hz  
 GB 0  
 PC 1.00

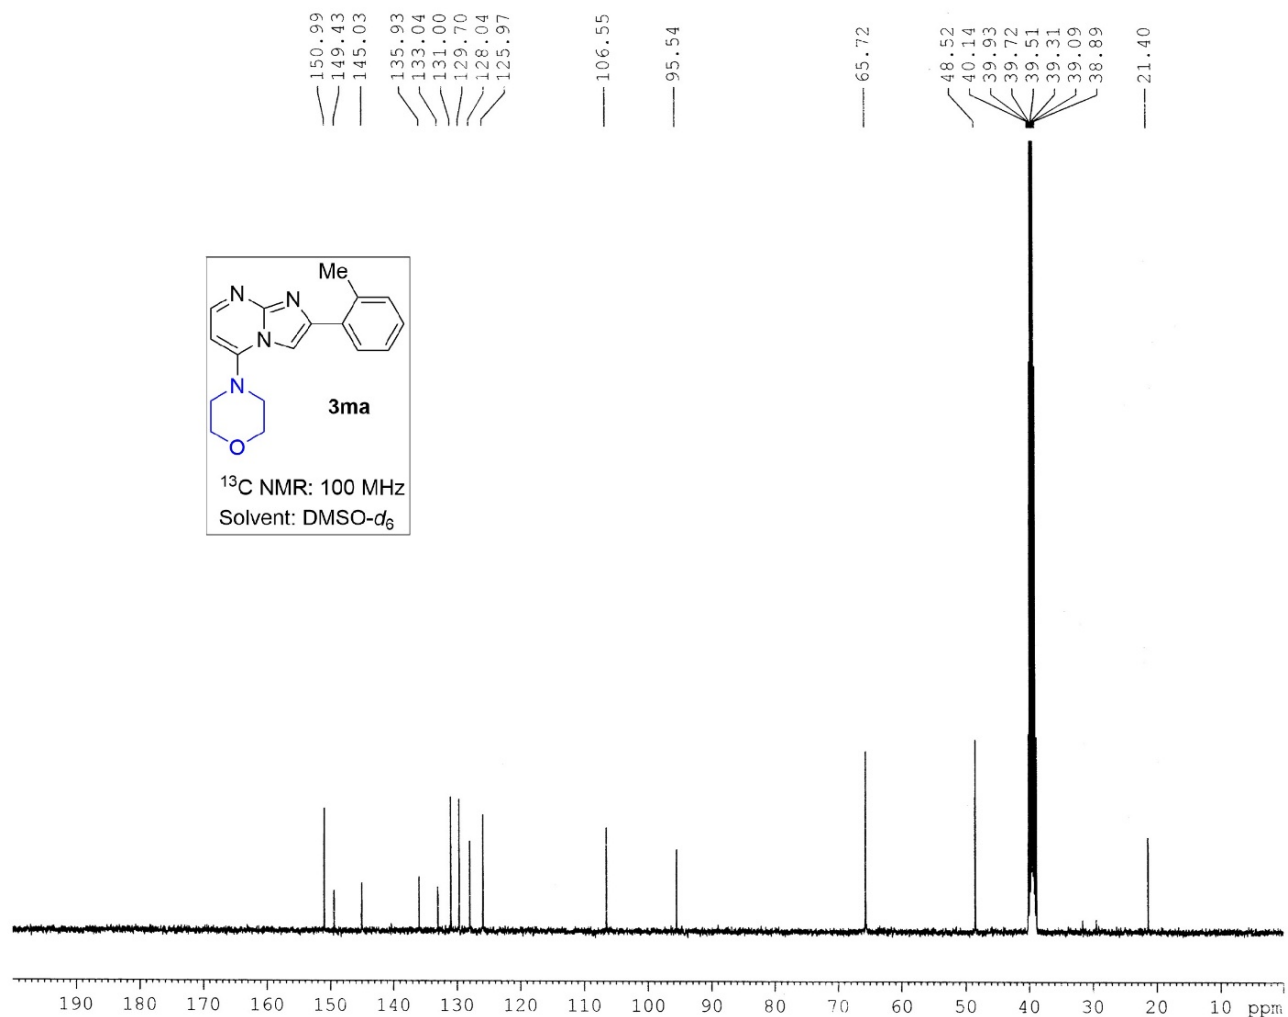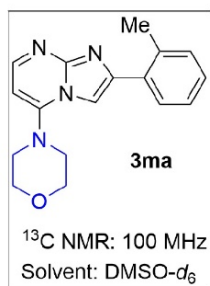

Current Data Parameters  
 NAME Dr. A HAJRA-2025-13C  
 EXPNO 406  
 PROCNO 1

F2 - Acquisition Parameters  
 Date\_ 20251126  
 Time 12.56  
 INSTRUM spect  
 PROBHD 5 mm PABBO BE/  
 PULPROG zgpg30  
 TD 32768  
 SOLVENT DMSO  
 NS 650  
 DS 2  
 SWH 24038.461 Hz  
 FIDRES 0.733596 Hz  
 AQ 0.6815744 sec  
 RG 186.42  
 DW 20.800 usec  
 DE 6.50 usec  
 TE 288.1 K  
 D1 2.00000000 sec  
 D11 0.03000000 sec  
 TDC 1

===== CHANNEL f1 =====  
 SFO1 100.6278588 MHz  
 NUC1 13C  
 P1 8.90 usec  
 PLW1 54.00000000 W

===== CHANNEL f2 =====  
 SFO2 400.1516006 MHz  
 NUC2 1H  
 CPDPRG[2] waltz16  
 PCPD2 90.00 usec  
 PLW2 12.00000000 W  
 PLW12 0.32231000 W  
 PLW13 0.16212000 W

F2 - Processing parameters  
 SI 16384  
 SF 100.6178317 MHz  
 WDW EM  
 SSB 0  
 LB 1.00 Hz  
 GB 0  
 PC 1.40

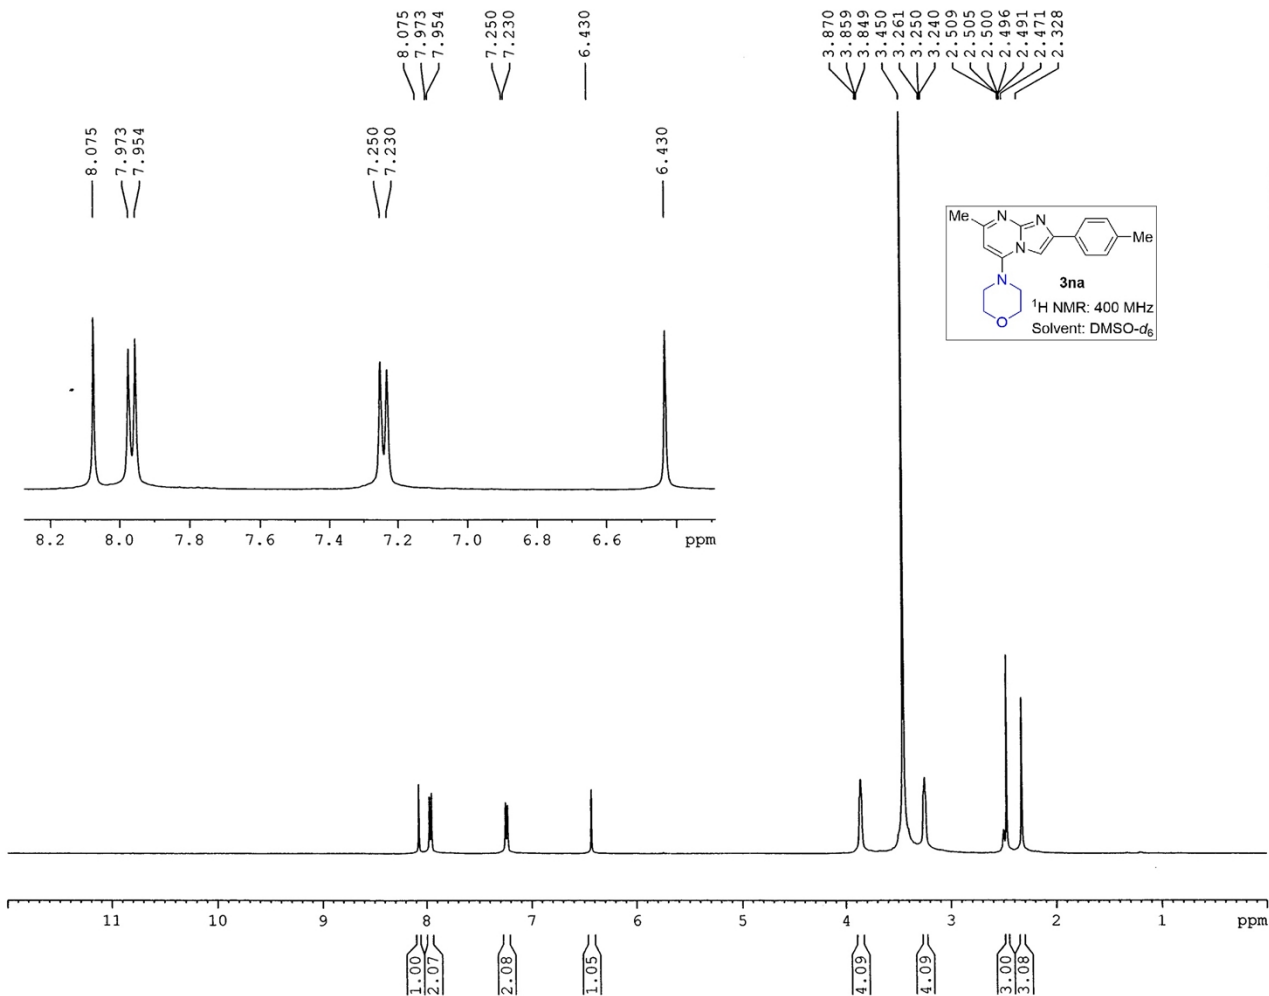

Current Data Parameters  
 NAME Dr. A HAJRA 2025 1H  
 EXPNO 450  
 PROCNO 1

F2 - Acquisition Parameters  
 Date\_ 20250727  
 Time\_ 12.08  
 INSTRUM spect  
 PROBHD 5 mm PABBO BB/  
 PULPROG zg30  
 TD 32768  
 SOLVENT DMSO  
 NS 8  
 DS 2  
 SWH 8223.685 Hz  
 FIDRES 0.250967 Hz  
 AQ 1.9922944 sec  
 RG 47.25  
 DW 60.800 usec  
 DE 6.50 usec  
 TE 293.1 K  
 D1 1.00000000 sec  
 TD0 1

===== CHANNEL f1 =====  
 SFO1 400.1524711 MHz  
 NUC1 1H  
 P1 14.75 usec  
 PLW1 12.00000000 W

F2 - Processing parameters  
 SI 16384  
 SF 400.1500030 MHz  
 WDW EM  
 SSB 0  
 LB 0.30 Hz  
 GB 0  
 PC 1.00

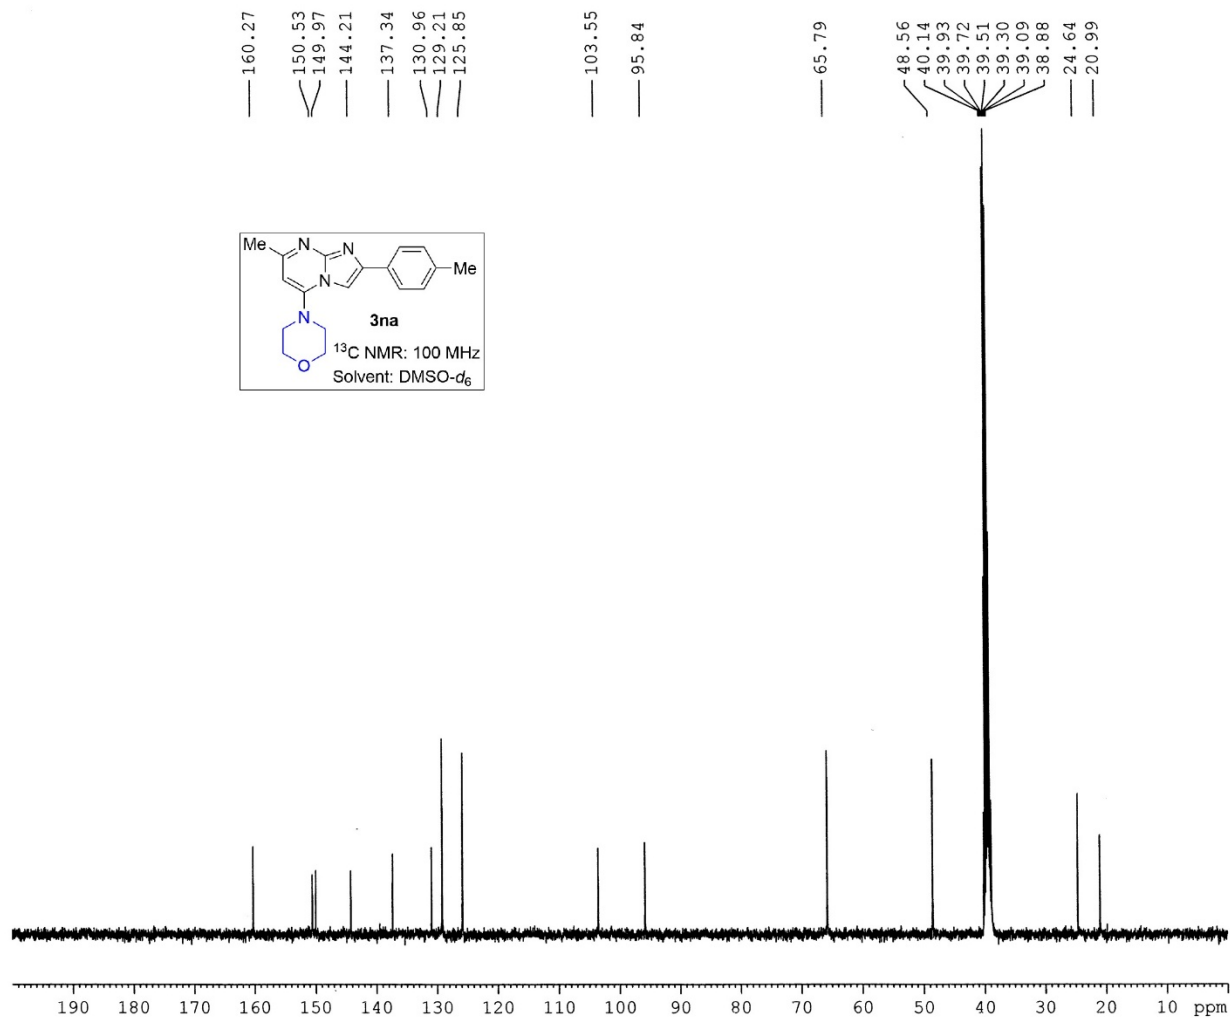

Current Data Parameters  
 NAME Dr. A HAJRA-2025-13C  
 EXPNO 261  
 PROCNO 1

F2 - Acquisition Parameters  
 Date\_ 20250727  
 Time 12.22  
 INSTRUM spect  
 PROBHD 5 mm FAPBO BB/  
 PULPROG zgpg30  
 TD 32768  
 SOLVENT DMSO  
 NS 200  
 DS 2  
 SWH 24038.461 Hz  
 FIDRES 0.733596 Hz  
 AQ 0.6815744 sec  
 RG 186.42  
 DW 20.800 usec  
 DE 6.50 usec  
 TE 293.4 K  
 D1 2.00000000 sec  
 D11 0.03000000 sec  
 TDO 1

===== CHANNEL f1 =====  
 SFO1 100.6278588 MHz  
 NUC1 13C  
 P1 8.90 usec  
 PLW1 54.00000000 W

===== CHANNEL f2 =====  
 SFO2 400.1516006 MHz  
 NUC2 1H  
 CPDPRG[2] waltz16  
 P1 90.00 usec  
 PLW2 12.00000000 W  
 PLW12 0.32231000 W  
 PLW13 0.16212000 W

F2 - Processing parameters  
 SI 16384  
 SF 100.6178346 MHz  
 WDW EM  
 SSB 0  
 LB 1.00 Hz  
 GB 0  
 PC 1.40

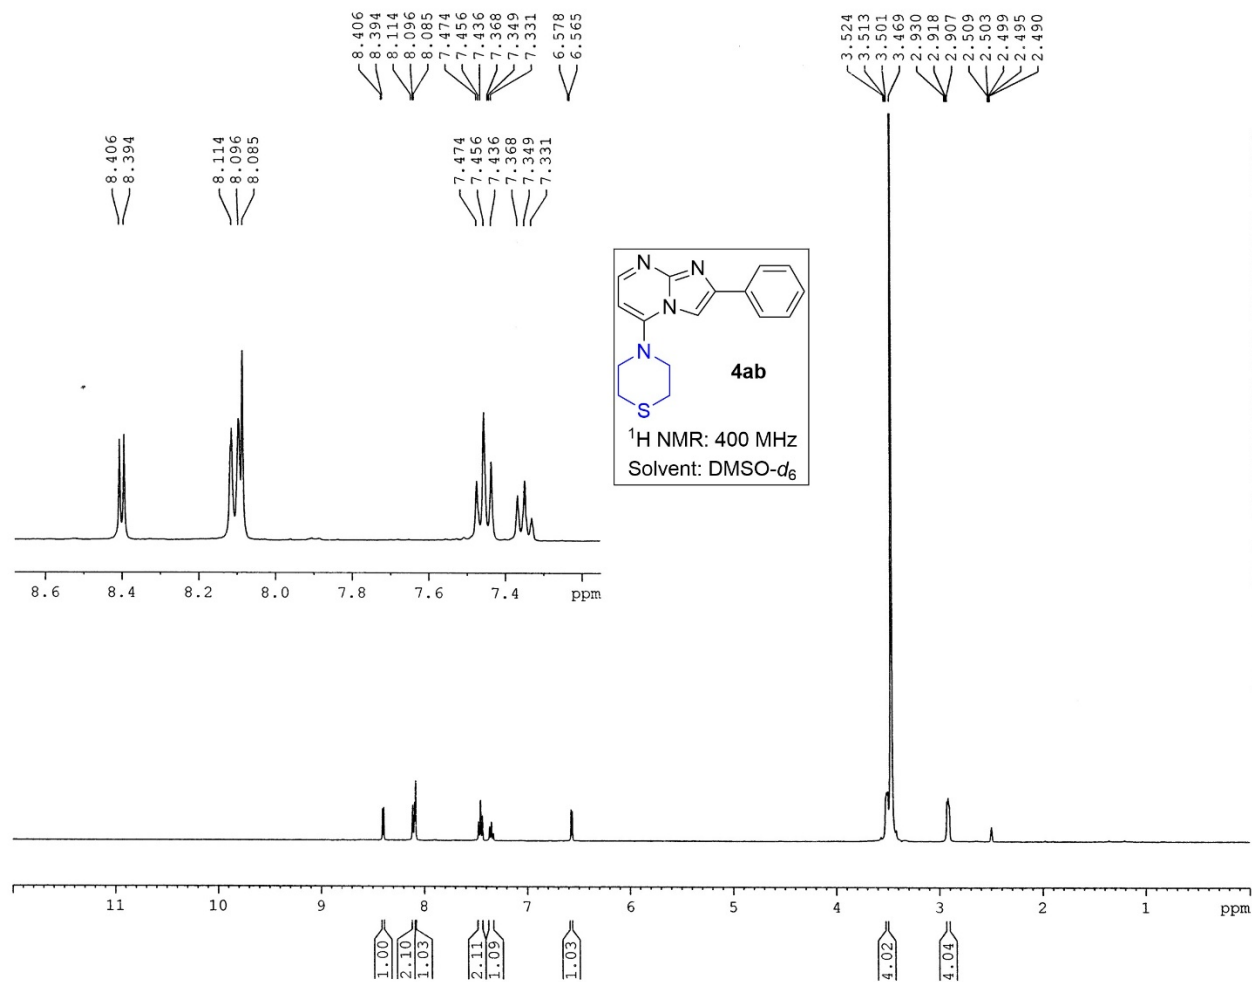

Current Data Parameters  
 NAME Dr. A HAJRA 2025 1H  
 EXPNO 402  
 PROCNO 1

F2 - Acquisition Parameters  
 Date\_ 20250716  
 Time 12.21  
 INSTRUM spect  
 PROBHD 5 mm PABBO BB/  
 PULPROG zg30  
 TD 32768  
 SOLVENT DMSO  
 NS 8  
 DS 2  
 SWH 8223.685 Hz  
 FIDRES 0.250967 Hz  
 AQ 1.9922944 sec  
 RG 54.07  
 DW 60.800 usec  
 DE 6.50 usec  
 TE 293.6 K  
 D1 1.00000000 sec  
 TD0 1

==== CHANNEL f1 =====  
 SFO1 400.1524711 MHz  
 NUC1 1H  
 P1 14.75 usec  
 PLW1 12.00000000 W

F2 - Processing parameters  
 SI 16384  
 SF 400.1500031 MHz  
 WDW EM  
 SSB 0  
 LB 0.30 Hz  
 GB 0  
 PC 1.00

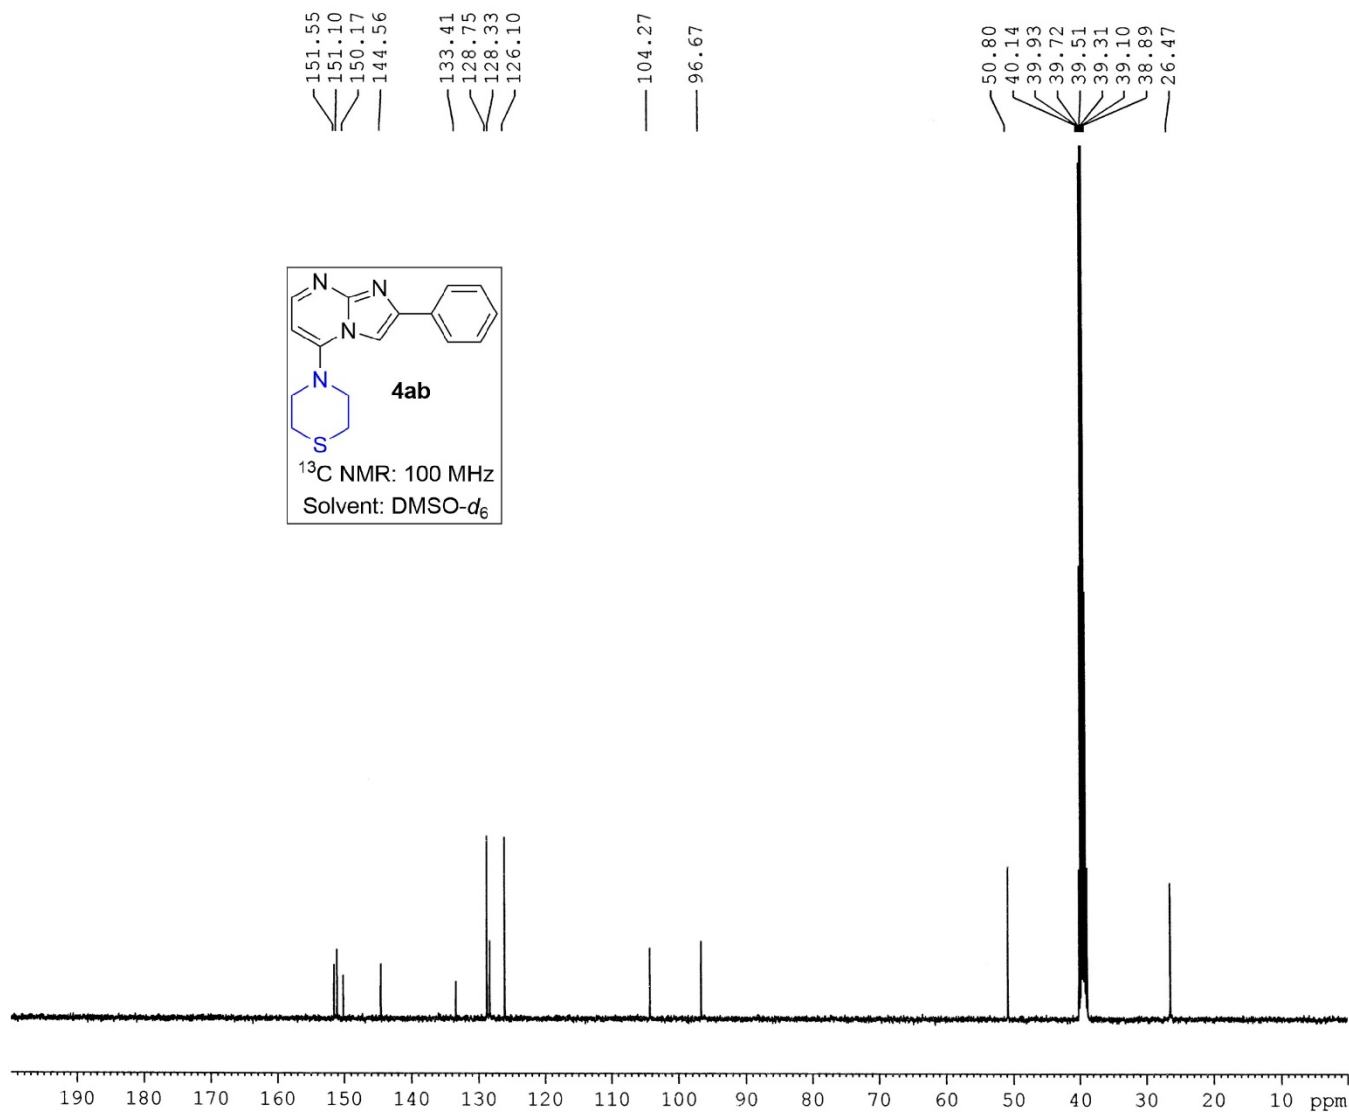

Current Data Parameters  
 NAME Dr. A HAJRA-2025-13C  
 EXPNO 233  
 PROCNO 1

F2 - Acquisition Parameters  
 Date\_ 20250716  
 Time\_ 12.53  
 INSTRUM spect  
 PROBHD 5 mm PABBO BB/  
 PULPROG zgpg30  
 TD 32768  
 SOLVENT DMSO  
 NS 560  
 DS 2  
 SWH 24038.461 Hz  
 FIDRES 0.733596 Hz  
 AQ 0.6815744 sec  
 RG 186.42  
 DW 20.800 usec  
 DE 6.50 usec  
 TE 293.8 K  
 D1 2.00000000 sec  
 D11 0.03000000 sec  
 TD0 1

===== CHANNEL f1 =====  
 SFO1 100.6278588 MHz  
 NUC1 13C  
 P1 8.90 usec  
 PLW1 54.00000000 W

===== CHANNEL f2 =====  
 SFO2 400.1516006 MHz  
 NUC2 1H  
 CPDPRG[2] waltz16  
 PCPD2 90.00 usec  
 PLW2 12.00000000 W  
 PLW12 0.32231000 W  
 PLW13 0.16212000 W

F2 - Processing parameters  
 SI 16384  
 SF 100.6178317 MHz  
 WDW EM  
 SSB 0  
 LB 1.00 Hz  
 GB 0  
 EC 1.40

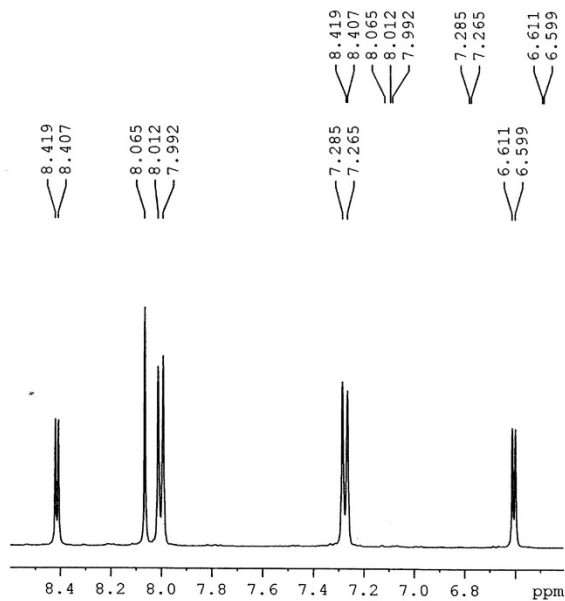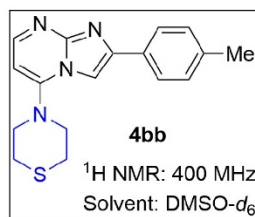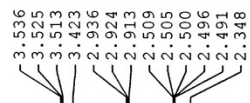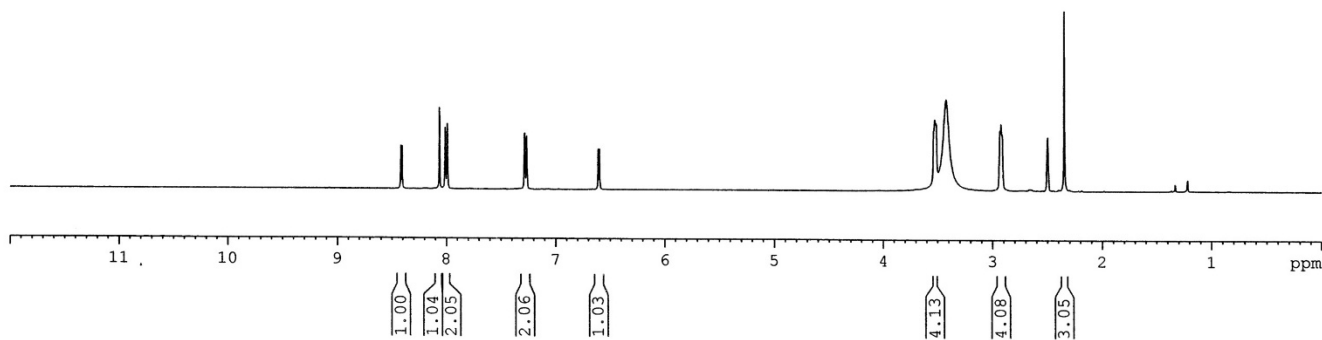

Current Data Parameters  
 NAME Dr. A HAJRA 2025 1H  
 EXPNO 417  
 PROCNO 1

F2 - Acquisition Parameters  
 Date\_ 20250719  
 Time\_ 12.08  
 INSTRUM spect  
 PROBHD 5 mm PABBO BB/  
 PULPROG zg30  
 TD 32768  
 SOLVENT DMSO  
 NS 8  
 DS 2  
 SWH 8223.685 Hz  
 FIDRES 0.250967 Hz  
 AQ 1.9922944 sec  
 RG 93.46  
 DW 60.800 usec  
 DE 6.50 usec  
 TE 293.0 K  
 D1 1.00000000 sec  
 TD0 1

==== CHANNEL f1 =====  
 SFO1 400.1524711 MHz  
 NUC1 1H  
 P1 14.75 usec  
 PLW1 12.00000000 W

F2 - Processing parameters  
 SI 16384  
 SF 400.1500030 MHz  
 WDW EM  
 SSB 0  
 LB 0.30 Hz  
 GB 0  
 PC 1.00

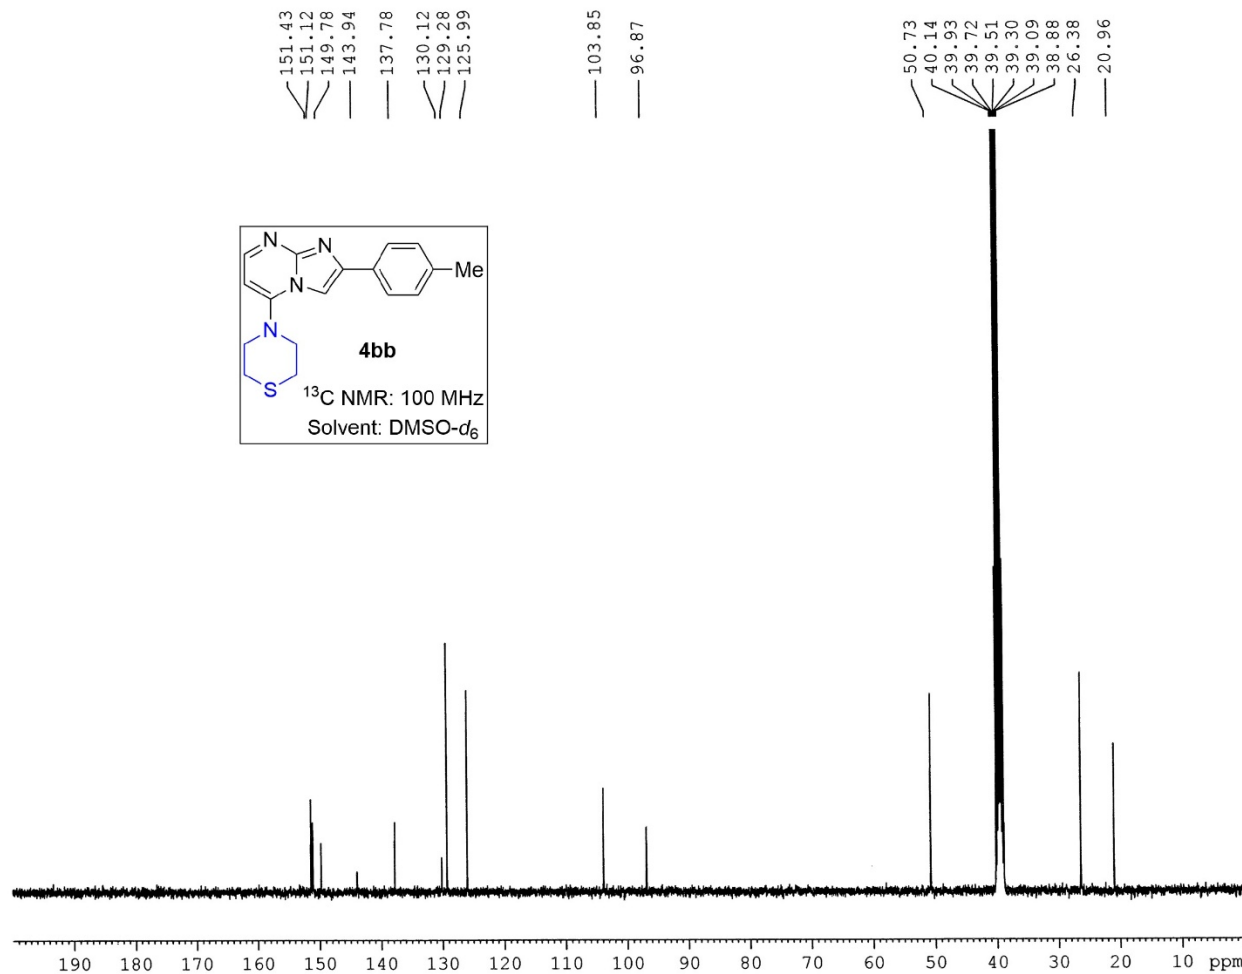

Current Data Parameters  
 NAME Dr. A HAJRA-2025-13C  
 EXPNO 243  
 PROCNO 1

F2 - Acquisition Parameters  
 Date\_ 20250719  
 Time 12.59  
 INSTRUM spect  
 PROBHD 5 mm PABBO BB/  
 PULPROG zgpg30  
 TD 32768  
 SOLVENT DMSO  
 NS 1000  
 DS 2  
 SWH 24038.461 Hz  
 FIDRES 0.733596 Hz  
 AQ 0.6815744 sec  
 RG 186.42  
 DW 20.800 usec  
 DE 6.50 usec  
 TE 293.0 K  
 D1 2.00000000 sec  
 D11 0.03000000 sec  
 TDO 1

==== CHANNEL f1 =====  
 SFO1 100.6278588 MHz  
 NUC1 13C  
 P1 8.90 usec  
 PLW1 54.00000000 W

==== CHANNEL f2 =====  
 SFO2 400.1516006 MHz  
 NUC2 1H  
 CPDPRG[2] waltz16  
 PCPD2 90.00 usec  
 PLW2 12.00000000 W  
 PLW12 0.32231000 W  
 PLW13 0.16212000 W

F2 - Processing parameters  
 SI 16384  
 SF 100.6178405 MHz  
 WDW EM  
 SSB 0  
 LB 1.00 Hz  
 GB 0  
 PC 1.40

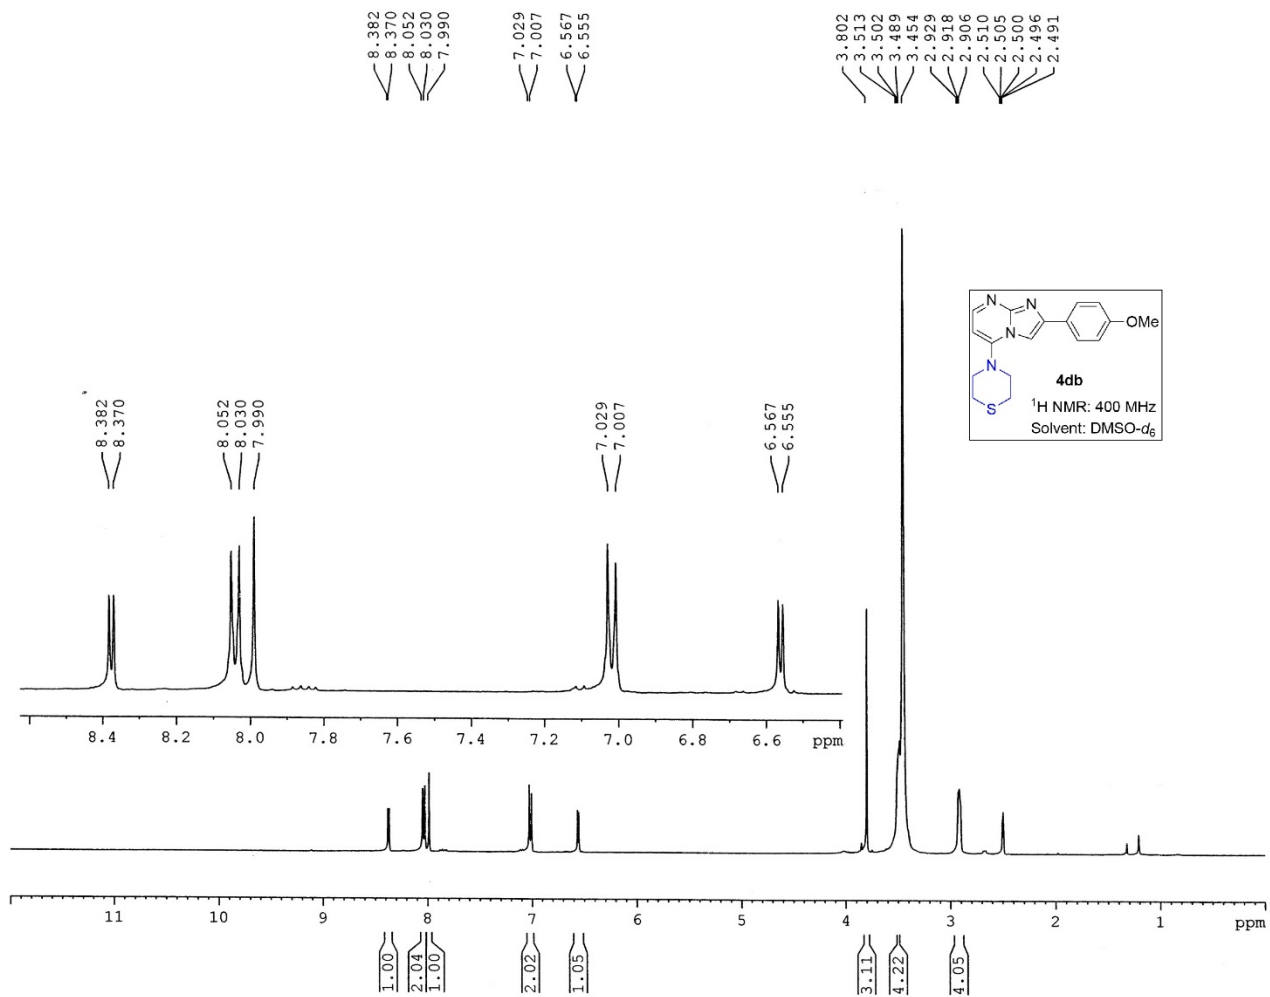

Current Data Parameters  
 NAME Dr. A HAJRA 2025 1H  
 EXPNO 573  
 PROCNO 1

F2 - Acquisition Parameters  
 Date\_ 20250922  
 Time 18.37  
 INSTRUM spect  
 PROBHD 5 mm PABBO BB/  
 PULPROG zg30  
 TD 32768  
 SOLVENT DMSO  
 NS 8  
 DS 2  
 SWH 8223.685 Hz  
 FIDRES 0.250967 Hz  
 AQ 1.9922944 sec  
 RG 62.69  
 DW 60.800 usec  
 DE 6.50 usec  
 TE 289.4 K  
 D1 1.00000000 sec  
 TD0 1

===== CHANNEL f1 =====  
 SF01 400.1524711 MHz  
 NUC1 1H  
 P1 14.75 usec  
 PLW1 12.00000000 W

F2 - Processing parameters  
 SI 16384  
 SF 400.1500026 MHz  
 WDW EM  
 SSB 0  
 LB 0.30 Hz  
 GB 0  
 PC 1.00

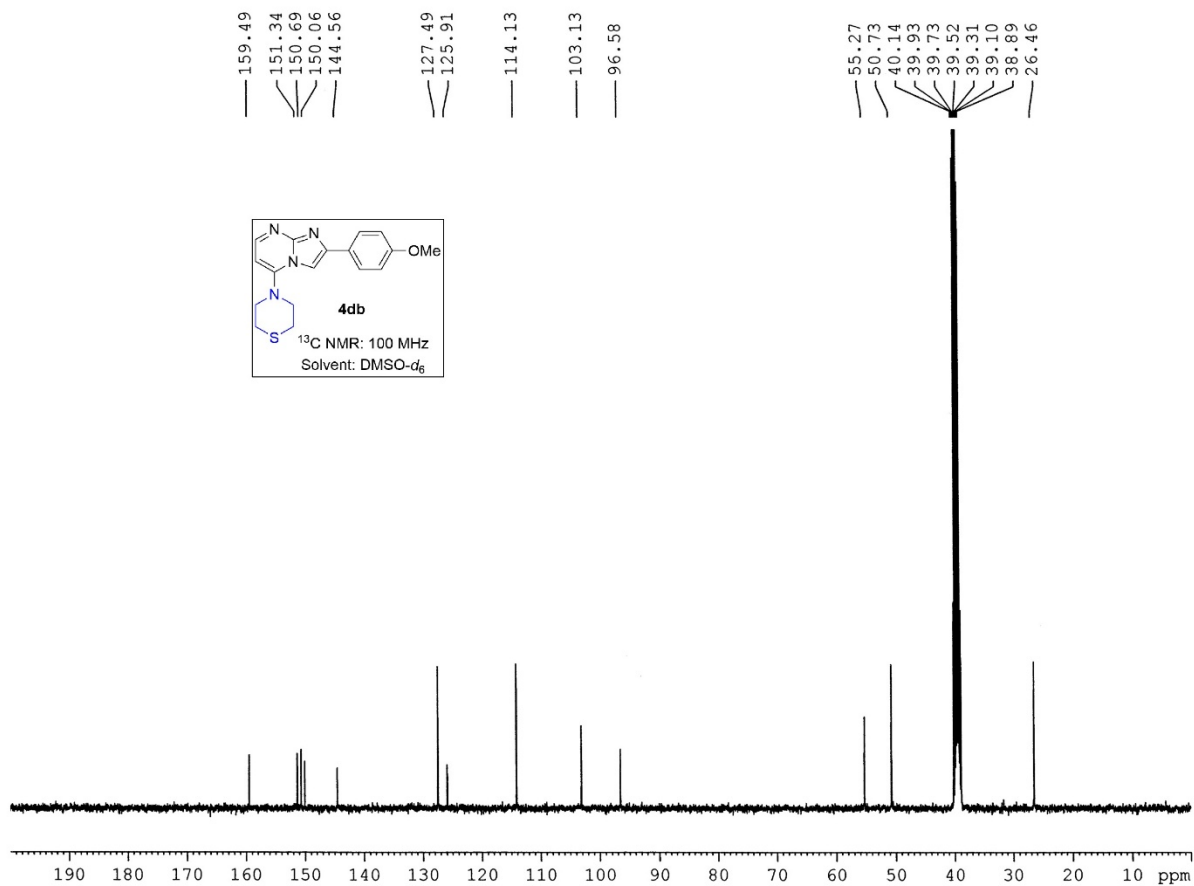

Current Data Parameters  
 NAME Dr. A HAJRA-2025-13C  
 EXPNO 328  
 PROCNO 1

F2 - Acquisition Parameters  
 Date\_ 20250922  
 Time\_ 19.08  
 INSTRUM spect  
 PROBHD 5 mm PABBO BB/  
 PULPROG zgpg30  
 TD 32768  
 SOLVENT DMSO  
 NS 600  
 DS 2  
 SWH 24038.461 Hz  
 FIDRES 0.733596 Hz  
 AQ 0.6815744 sec  
 RG 186.42  
 DW 20.800 usec  
 DE 6.50 usec  
 TE 290.0 K  
 D1 2.00000000 sec  
 D11 0.03000000 sec  
 TDO 1

===== CHANNEL f1 =====  
 SFO1 100.6278588 MHz  
 NUC1 13C  
 P1 8.90 usec  
 PLW1 54.00000000 W

===== CHANNEL f2 =====  
 SFO2 400.1516006 MHz  
 NUC2 1H  
 CPDPRG[2] waltz16  
 FCFD2 90.00 usec  
 PLW2 12.00000000 W  
 PLW12 0.32231000 W  
 PLW13 0.16212000 W

F2 - Processing parameters  
 SI 16384  
 SF 100.6178332 MHz  
 WDW EM  
 SSB 0  
 LB 1.00 Hz  
 GB 0  
 PC 1.40

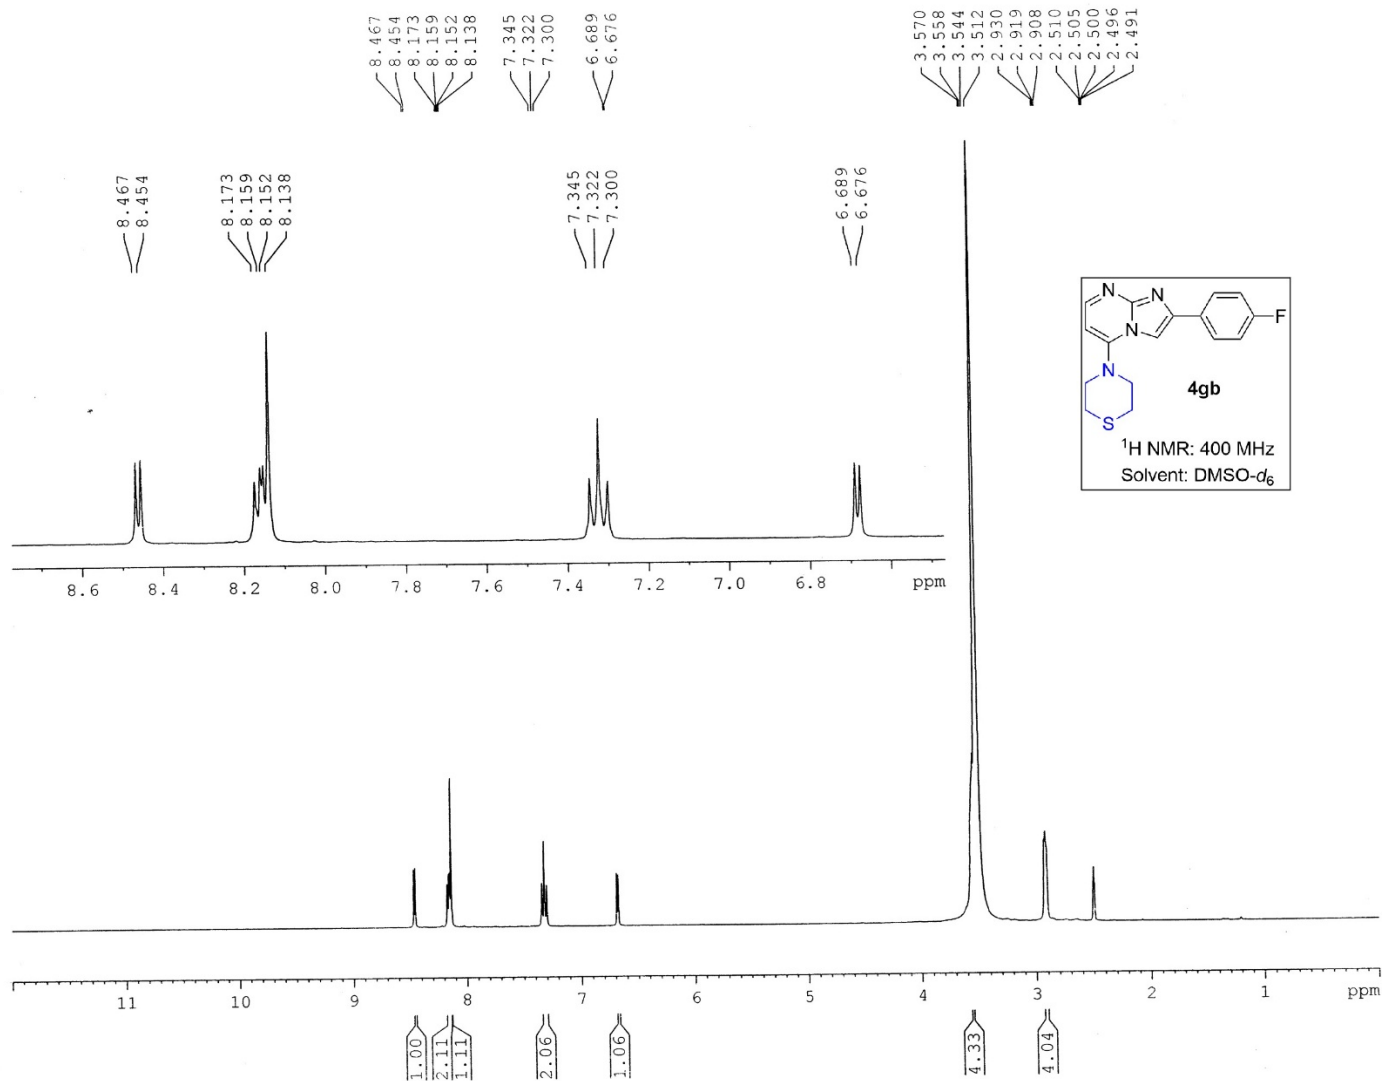

Current Data Parameters  
 NAME Dr. A HAJRA 2025 1H  
 EXPNO 563  
 PROCNO 1

F2 - Acquisition Parameters  
 Date\_ 20250918  
 Time\_ 18.52  
 INSTRUM spect  
 PROBHD 5 mm PABBO BB/  
 PULPROG zg30  
 TD 32768  
 SOLVENT DMSO  
 NS 8  
 DS 2  
 SWH 8223.685 Hz  
 FIDRES 0.250967 Hz  
 AQ 1.9922944 sec  
 RG 62.69  
 DW 60.800 usec  
 DE 6.50 usec  
 TE 293.4 K  
 D1 1.00000000 sec  
 TD0 1

==== CHANNEL f1 =====  
 SFO1 400.1524711 MHz  
 NUC1 1H  
 P1 14.75 usec  
 PLW1 12.00000000 W

F2 - Processing parameters  
 SI 16384  
 SF 400.1500031 MHz  
 WDW EM  
 SSB 0  
 LB 0.30 Hz  
 GB 0  
 PC 1.00

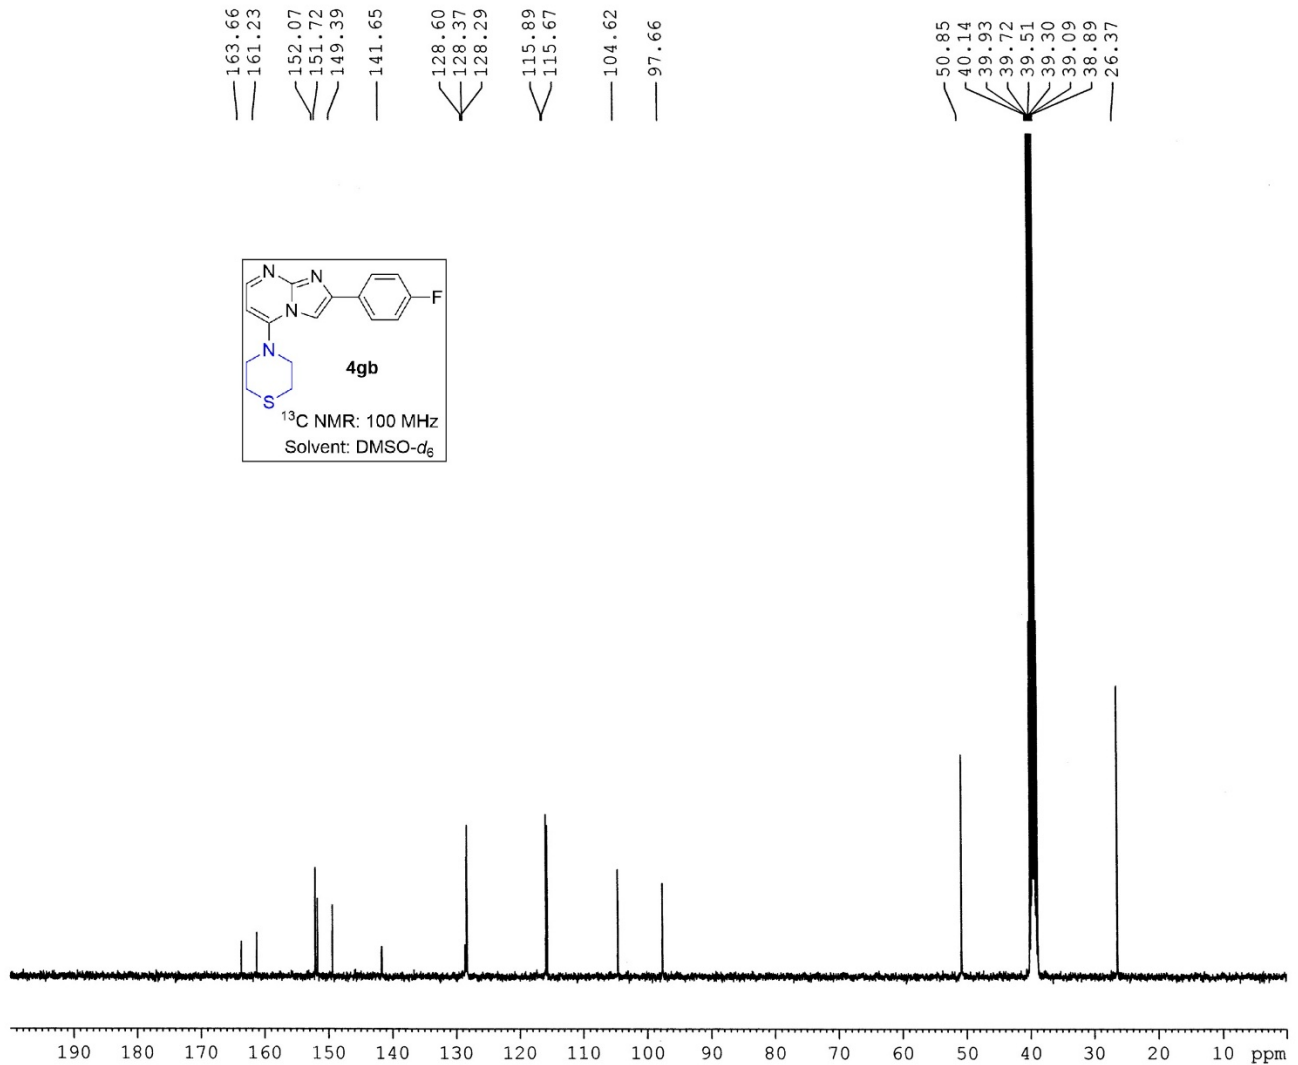

Current Data Parameters  
 NAME Dr. A HAJRA-2025-13C  
 EXPNO 322  
 PROCNO 1

F2 - Acquisition Parameters  
 Date\_ 20250918  
 Time 20.12  
 INSTRUM spect  
 PROBHD 5 mm PABBO BB/  
 PULPROG zgpg30  
 TD 32768  
 SOLVENT DMSO  
 NS 1600  
 DS 2  
 SWH 24038.461 Hz  
 FIDRES 0.733596 Hz  
 AQ 0.6815744 sec  
 RG 186.42  
 DW 20.800 usec  
 DE 6.50 usec  
 TE 294.5 K  
 D1 2.00000000 sec  
 D11 0.03000000 sec  
 TD0 1

===== CHANNEL f1 =====  
 SFO1 100.6278588 MHz  
 NUC1 13C  
 P1 8.90 usec  
 PLW1 54.00000000 W

===== CHANNEL f2 =====  
 SFO2 400.1516006 MHz  
 NUC2 1H  
 CPDPRG[2] waltz16  
 FCPD2 90.00 usec  
 PLW2 12.00000000 W  
 PLW12 0.32231000 W  
 PLW13 0.16212000 W

F2 - Processing parameters  
 SI 16384  
 SF 100.6178347 MHz  
 WDW EM  
 SSB 0  
 LB 1.00 Hz  
 GB 0  
 PC 1.40

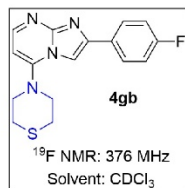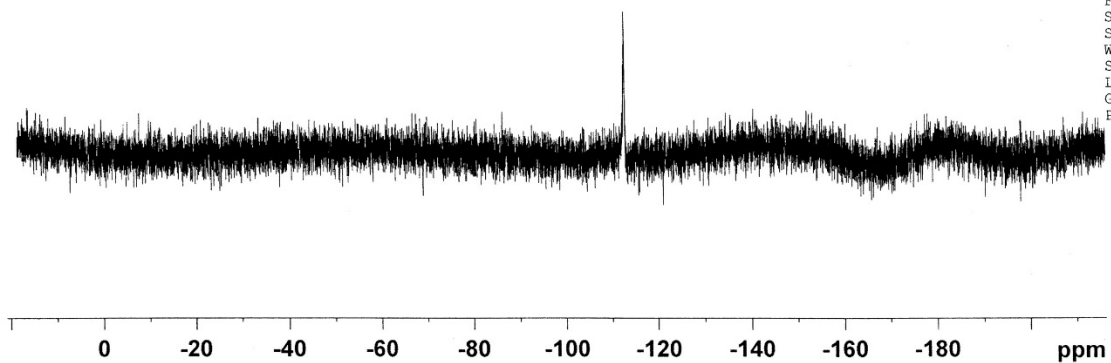

Current Data Parameters  
 NAME Dr. A HAJRA 2026 1H  
 EXPNO 153  
 PROCNO 1

F2 - Acquisition Parameters  
 Date\_ 20260227  
 Time\_ 19.08  
 INSTRUM spect  
 PROBHD 5 mm PABBO BB/  
 PULPROG zgflqn  
 TD 32768  
 SOLVENT CDCl3  
 NS 8  
 DS 2  
 SWH 89285.711 Hz  
 FIDRES 2.724784 Hz  
 AQ 0.1835008 sec  
 RG 186.42  
 DW 5.600 usec  
 DE 6.50 usec  
 TE 287.6 K  
 D1 1.00000000 sec  
 TD0 1

===== CHANNEL f1 =====  
 SFO1 376.4795333 MHz  
 NUCL 19F  
 P1 12.50 usec  
 PLW1 20.00000000 W

F2 - Processing parameters  
 SI 16384  
 SF 376.5171850 MHz  
 WDW EM  
 SSB 0  
 LB 0.30 Hz  
 GB 0  
 PC 1.00

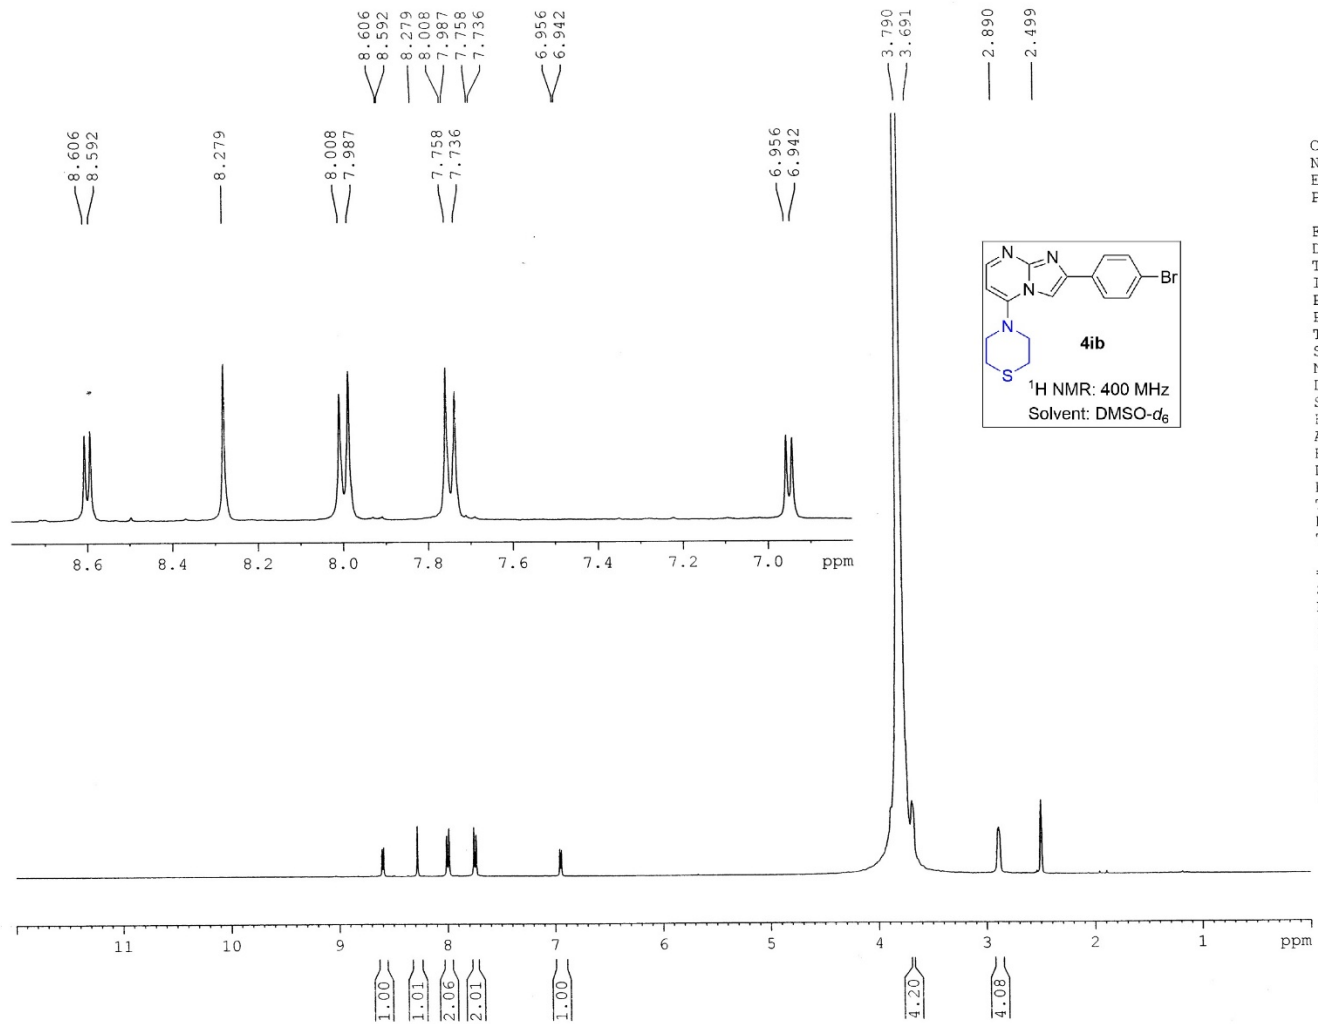

Current Data Parameters  
 NAME Dr. A HAJRA 2025 1H  
 EXPNO 587  
 PROCNO 1

F2 - Acquisition Parameters  
 Date\_ 20250925  
 Time 18.26  
 INSTRUM spect  
 PROBHD 5 mm PABBO BB/  
 PULPROG zg30  
 TD 32768  
 SOLVENT DMSO  
 NS 8  
 DS 2  
 SWH 8223.685 Hz  
 FIDRES 0.250967 Hz  
 AQ 1.9922944 sec  
 RG 14.61  
 DW 60.800 usec  
 DE 6.50 usec  
 TE 291.0 K  
 D1 1.0000000 sec  
 TD0 1

===== CHANNEL f1 =====  
 SFO1 400.1524711 MHz  
 NUC1 1H  
 P1 14.75 usec  
 PLW1 12.00000000 W

F2 - Processing parameters  
 SI 16384  
 SF 400.1500032 MHz  
 WDW EM  
 SSB 0  
 LB 0.30 Hz  
 GB 0  
 PC 1.00

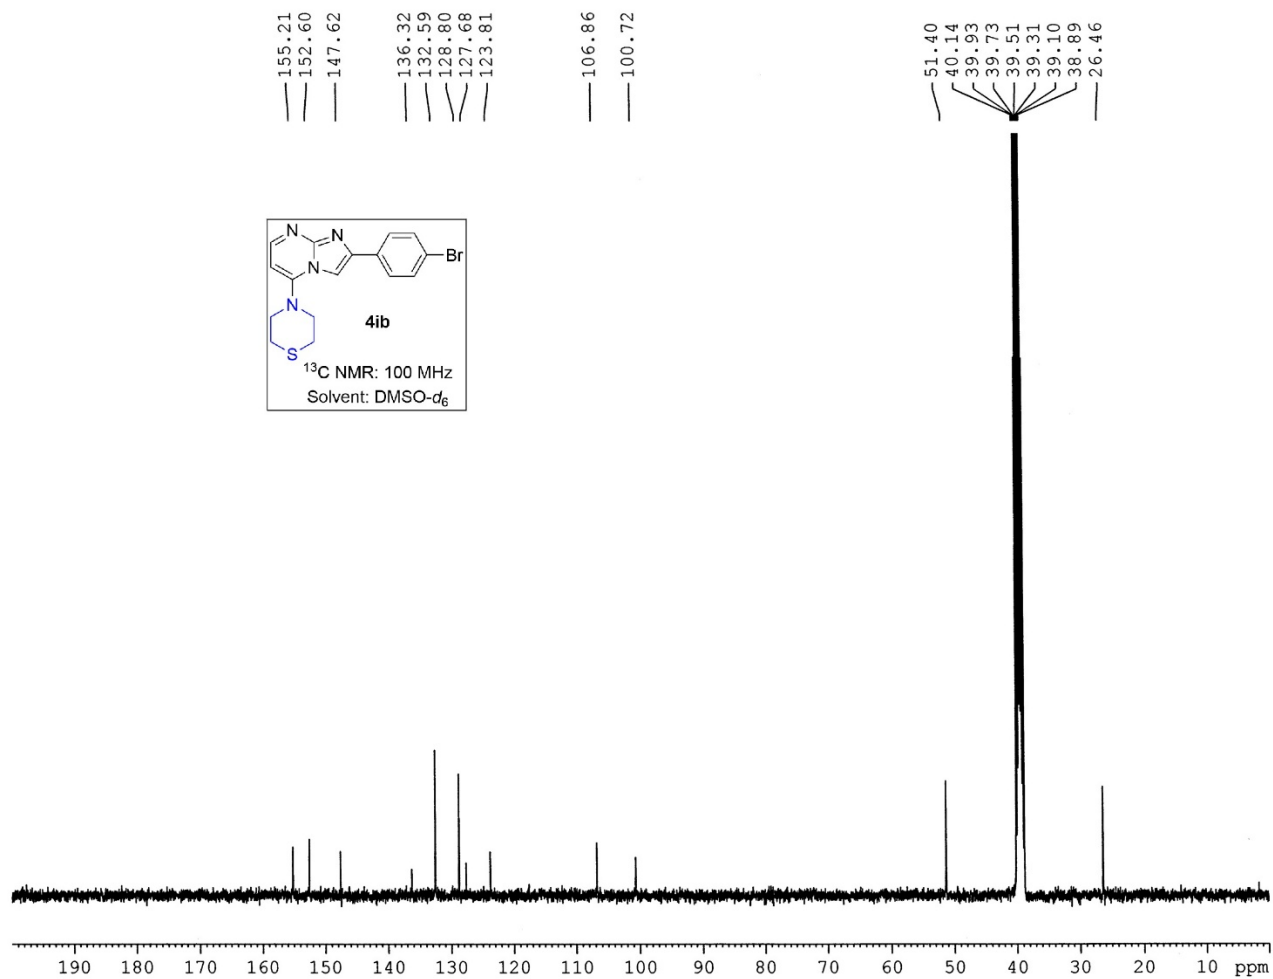

Current Data Parameters  
 NAME Dr. A HAJRA-2025-13C  
 EXPNO 340  
 PROCNO 1

F2 - Acquisition Parameters  
 Date\_ 20250925  
 Time 19.57  
 INSTRUM spect  
 PROBHD 5 mm FAPBO BB/  
 PULPROG zgpg30  
 TD 32768  
 SOLVENT DMSO  
 NS 1900  
 DS 2  
 SWH 24038.461 Hz  
 FIDRES 0.733596 Hz  
 AQ 0.6815744 sec  
 RG 186.42  
 DW 20.800 usec  
 DE 6.50 usec  
 TE 293.2 K  
 D1 2.00000000 sec  
 D11 0.03000000 sec  
 TDO 1

===== CHANNEL f1 =====  
 SFO1 100.6278588 MHz  
 NUC1 13C  
 P1 8.90 usec  
 PLW1 54.0000000 W

===== CHANNEL f2 =====  
 SFO2 400.1516006 MHz  
 NUC2 1H  
 CPDPRG[2] waltz16  
 FCPD2 90.00 usec  
 PLW2 12.00000000 W  
 PLW12 0.32231000 W  
 PLW13 0.16212000 W

F2 - Processing parameters  
 SI 16384  
 SF 100.6177980 MHz  
 WDW EM  
 SSB 0  
 LB 1.00 Hz  
 GB 0  
 PC 1.40

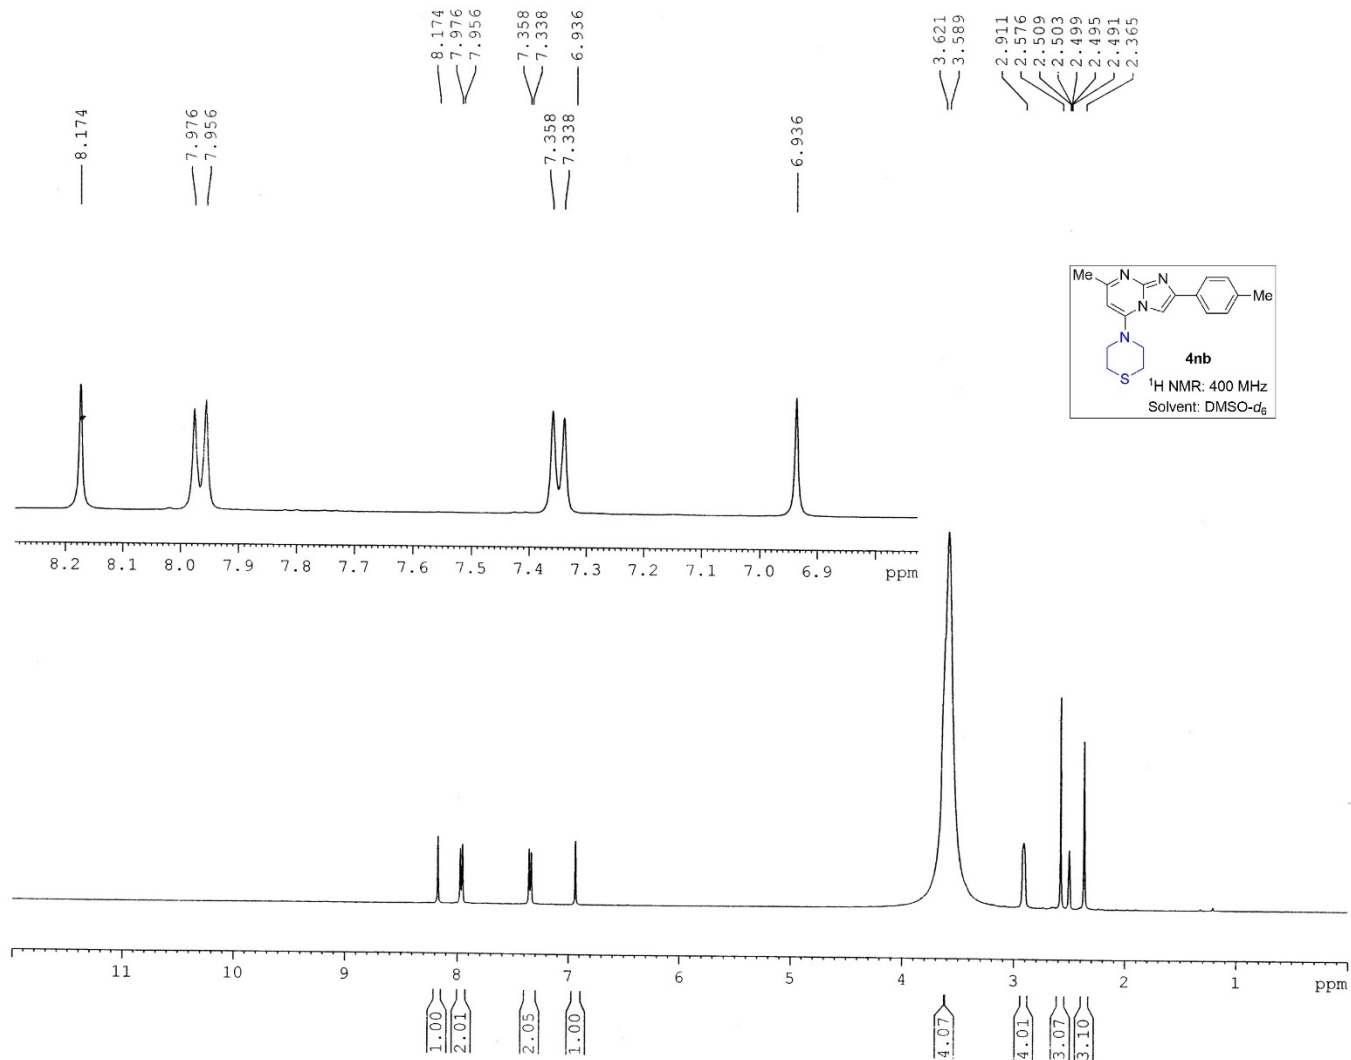

Current Data Parameters  
 NAME Dr. A HAJRA 2025 1H  
 EXPNO 542  
 PROCNO 1

F2 - Acquisition Parameters  
 Date\_ 20250909  
 Time 12.32  
 INSTRUM spect  
 PROBHD 5 mm PABBO BB/  
 PULPROG zg30  
 TD 32768  
 SOLVENT DMSO  
 NS 8  
 DS 2  
 SWH 8223.685 Hz  
 FIDRES 0.250967 Hz  
 AQ 1.9922944 sec  
 RG 54.07  
 DW 60.800 usec  
 DE 6.50 usec  
 TE 292.2 K  
 D1 1.00000000 sec  
 TD0 1

===== CHANNEL f1 =====  
 SF01 400.1524711 MHz  
 NUC1 1H  
 P1 14.75 usec  
 PLW1 12.00000000 W

F2 - Processing parameters  
 SI 16384  
 SF 400.1500030 MHz  
 WDW EM  
 SSB 0  
 LB 0.30 Hz  
 GB 0  
 PC 1.00

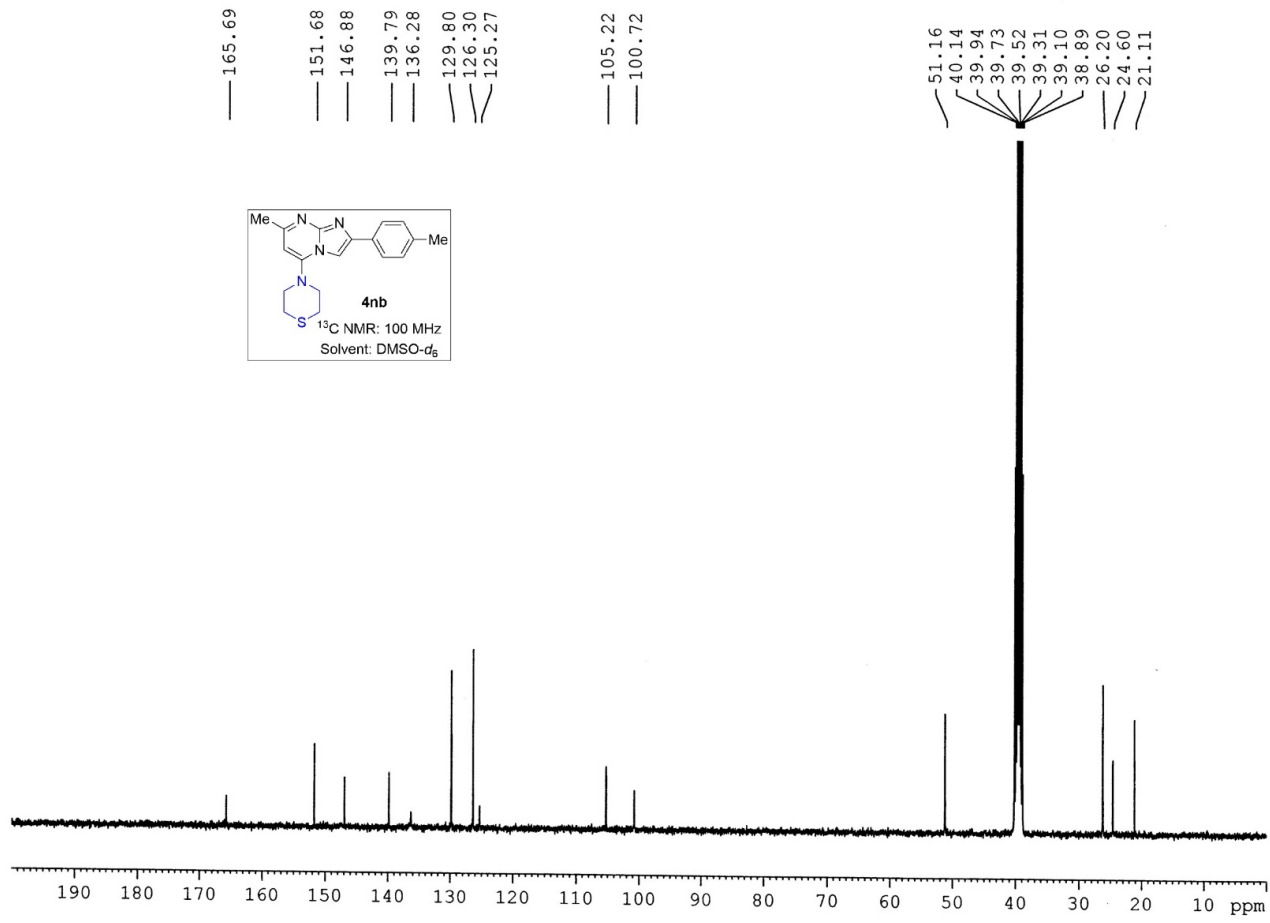

```

Current Data Parameters
NAME      Dr. A HAJRA-2025-13C
EXPNO     310
PROCNO    1

F2 - Acquisition Parameters
Date_     20250909
Time      14.11
INSTRUM   spect
PROBHD    5 mm PABBO BB/
PULPROG   zgpg30
TD         32768
SOLVENT   DMSO
NS         2000
DS         2
SWH        24038.461 Hz
FIDRES     0.733596 Hz
AQ         0.6815744 sec
RG         186.42
DW         20.800 usec
DE         6.50 usec
TE         292.4 K
D1         2.00000000 sec
D11        0.03000000 sec
TD0        1

===== CHANNEL f1 =====
SFO1      100.6278588 MHz
NUC1       13C
P1         8.90 usec
PLW1       54.00000000 W

===== CHANNEL f2 =====
SFO2      400.1516006 MHz
NUC2        1H
CPDPRG[2]  waltz16
PCPD2      90.00 usec
PLW2       12.00000000 W
PLW12      0.32231000 W
PLW13      0.16212000 W

F2 - Processing parameters
SI         16384
SF         100.6178288 MHz
WDW        EM
SSB        0
LB         1.00 Hz
GB         0
PC         1.40

```

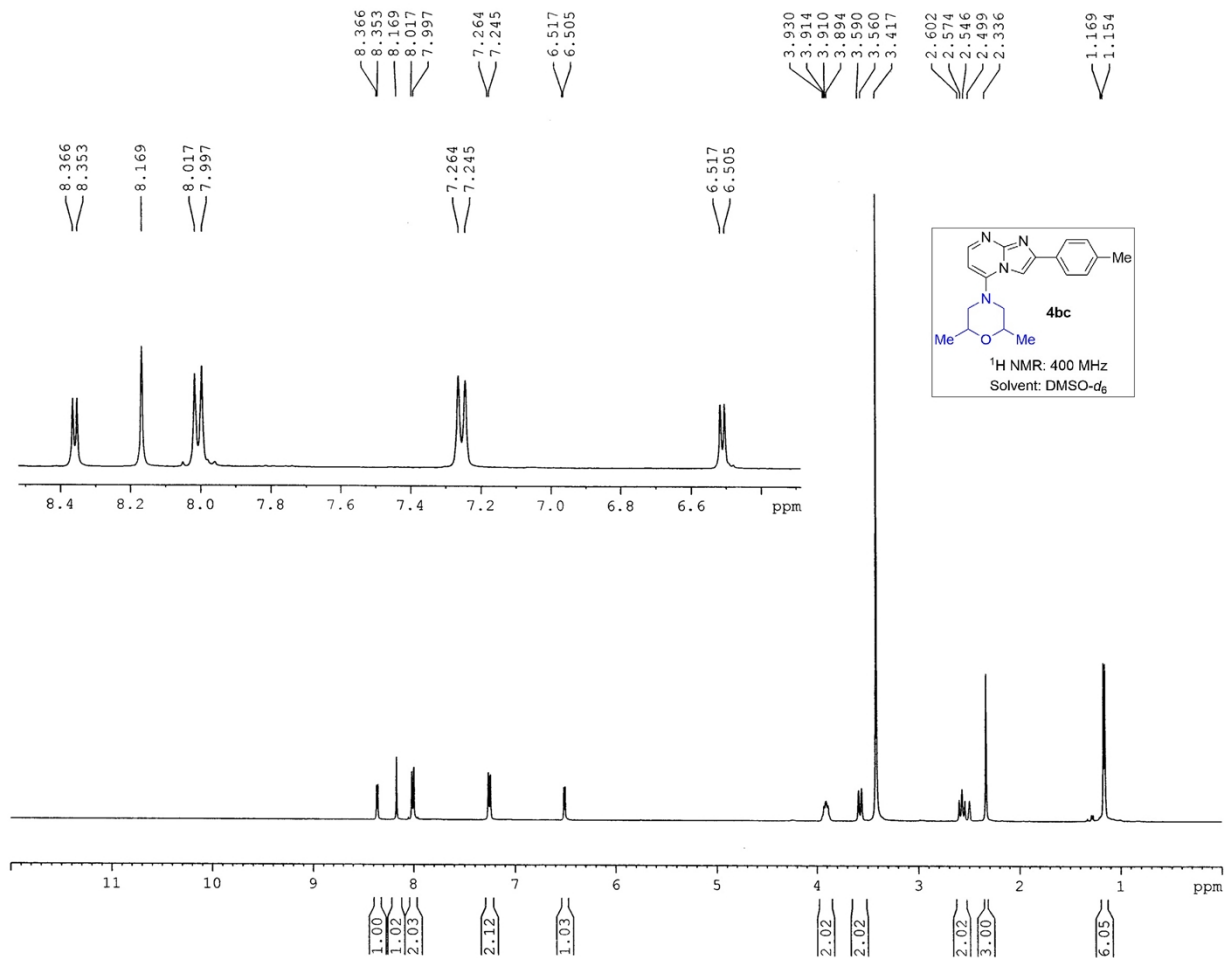

Current Data Parameters  
 NAME Dr. A HAJRA 2026 1H  
 EXPNO 273  
 PROCNO 1

F2 - Acquisition Parameters  
 Date\_ 20260505  
 Time 12.03  
 INSTRUM spect  
 PROBHD 5 mm PABBO BB/  
 PULPROG zg30  
 TD 32768  
 SOLVENT DMSO  
 NS 8  
 DS 2  
 SWH 8223.685 Hz  
 FIDRES 0.250967 Hz  
 AQ 1.9922944 sec  
 RG 62.69  
 DW 60.800 usec  
 DE 6.50 usec  
 TE 290.5 K  
 D1 1.00000000 sec  
 TD0 1

===== CHANNEL f1 =====  
 SF01 400.1524711 MHz  
 NUC1 1H  
 P1 14.75 usec  
 PLW1 12.00000000 W

F2 - Processing parameters  
 SI 16384  
 SF 400.1500028 MHz  
 WDW EM  
 SSB 0  
 LB 0.30 Hz  
 GB 0  
 PC 1.00

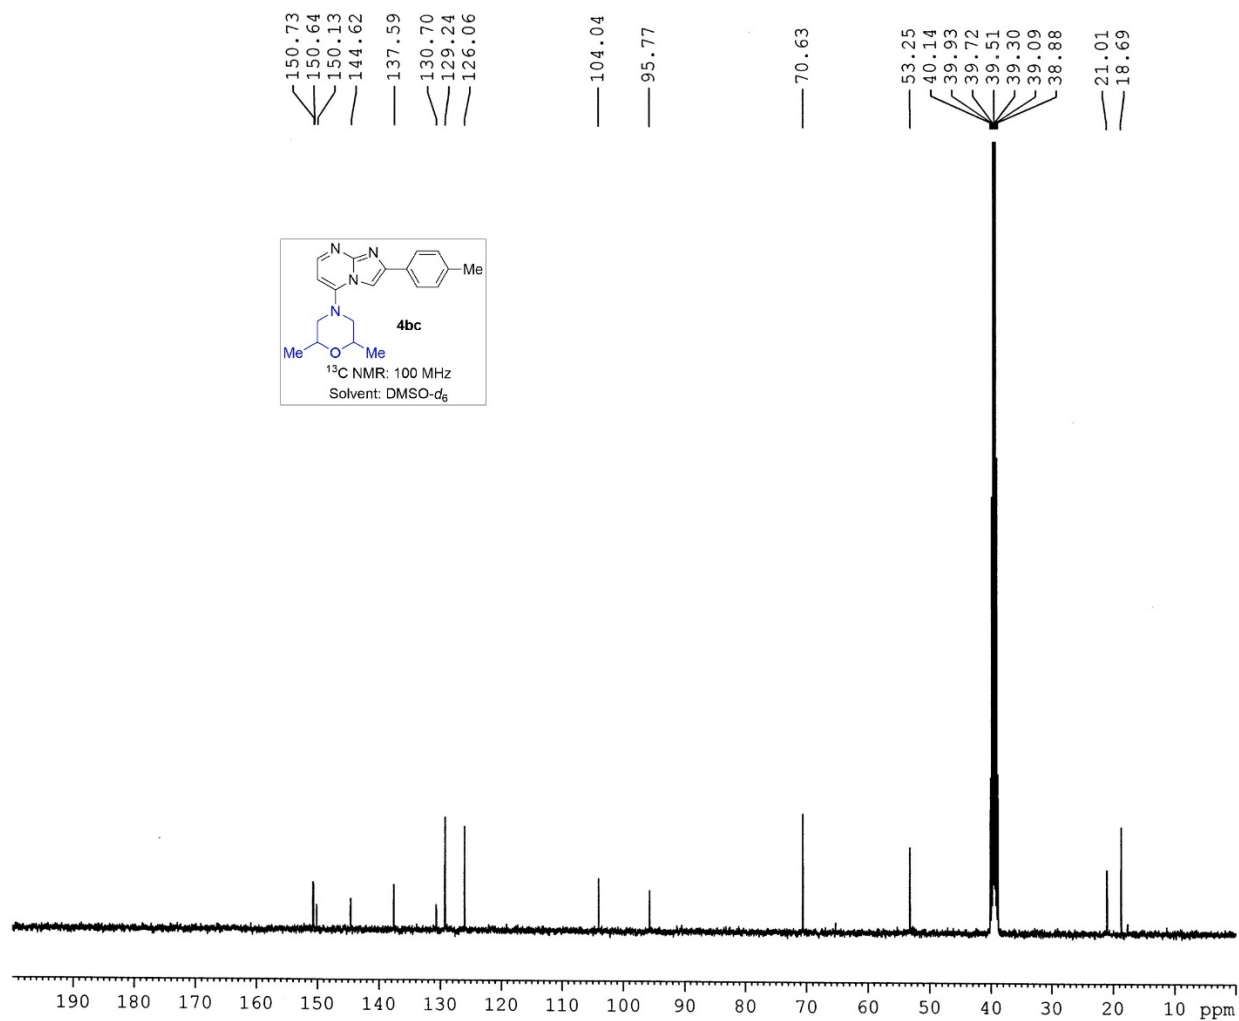

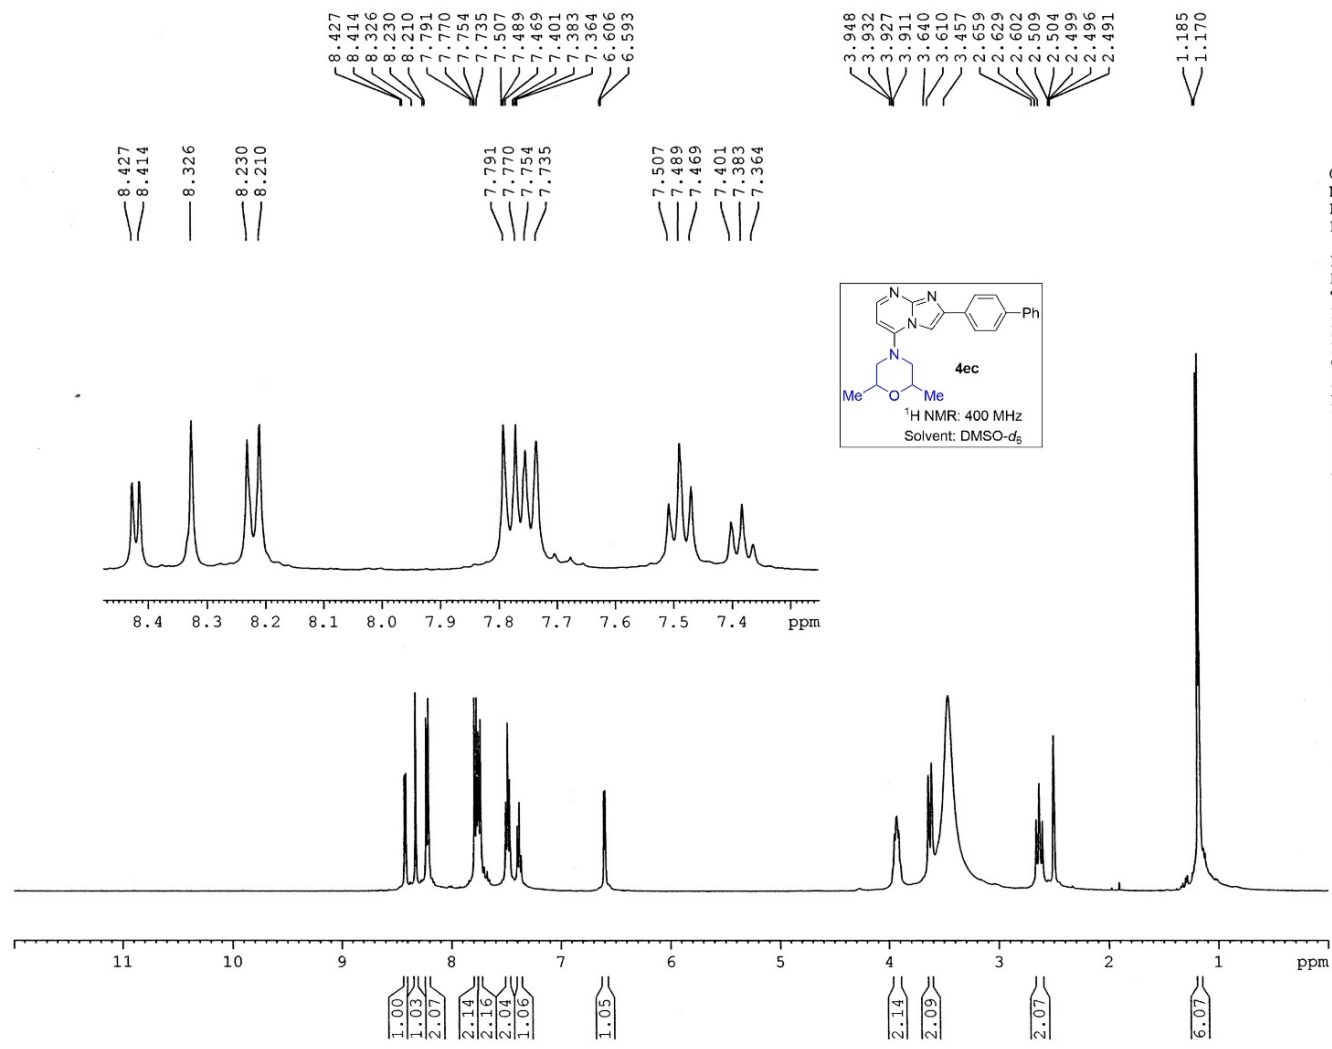

Current Data Parameters  
 NAME Dr. A HAJRA 2025 1H  
 EXPNO 666  
 PROCNO 1

F2 - Acquisition Parameters  
 Date\_ 20251114  
 Time\_ 12.21  
 INSTRUM spect  
 PROBHD 5 mm PABBO BB/  
 PULPROG zg30  
 TD 32768  
 SOLVENT DMSO  
 NS 8  
 DS 2  
 SWH 8223.685 Hz  
 FIDRES 0.250967 Hz  
 AQ 1.9922944 sec  
 RG 77.59  
 DW 60.800 usec  
 DE 6.50 usec  
 TE 288.9 K  
 D1 1.00000000 sec  
 TD0 1

==== CHANNEL f1 =====  
 SF01 400.1524711 MHz  
 NUC1 1H  
 P1 14.75 usec  
 PLW1 12.00000000 W

F2 - Processing parameters  
 SI 16384  
 SF 400.1500031 MHz  
 WDW EM  
 SSB 0  
 LB 0.30 Hz  
 GB 0  
 PC 1.00

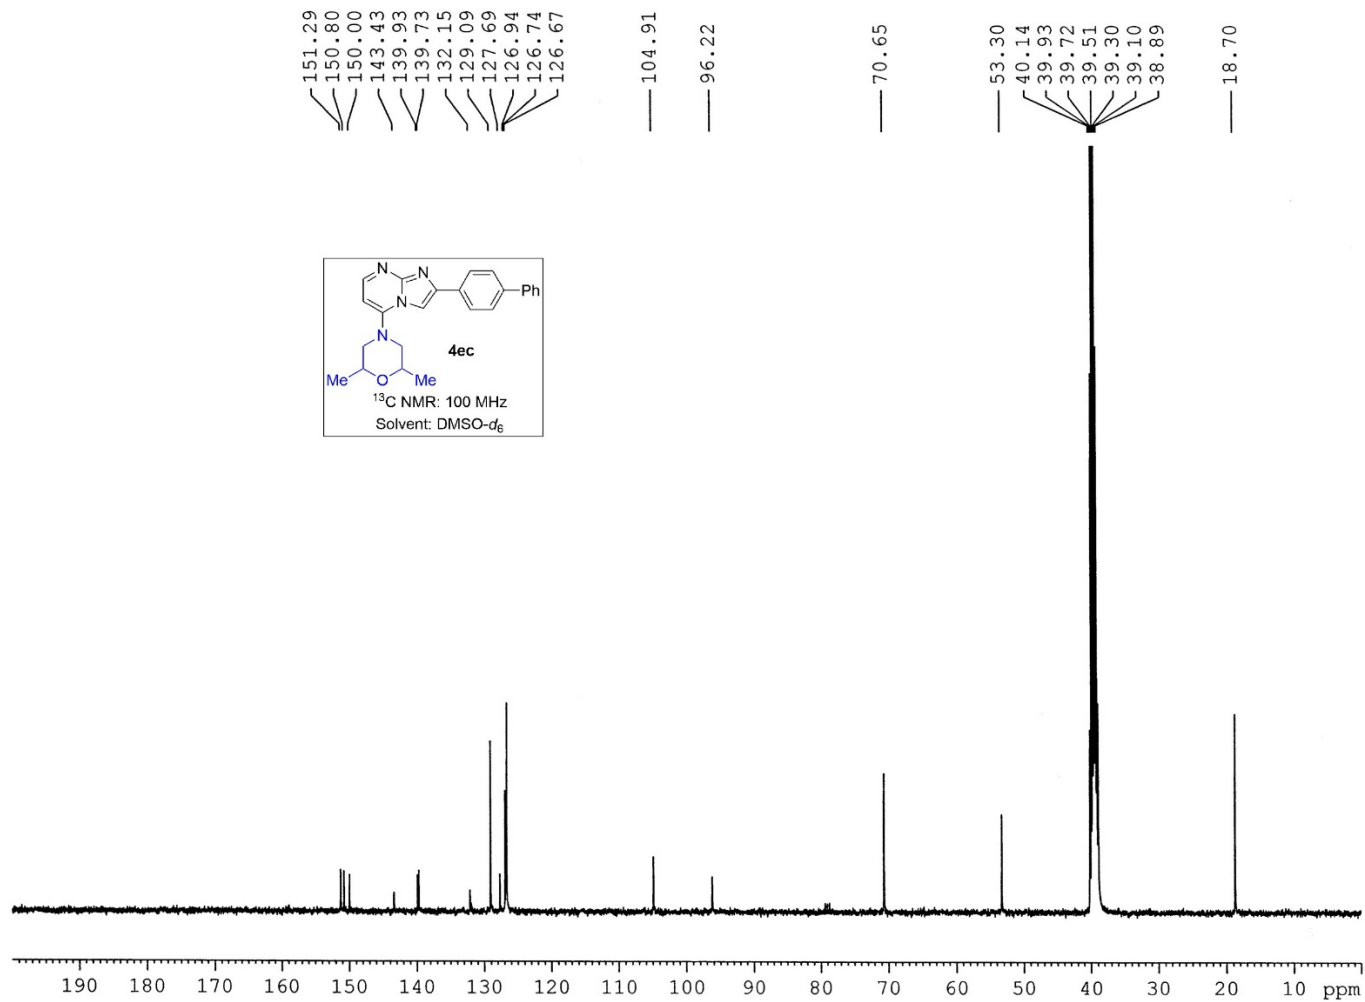

Current Data Parameters  
 NAME Dr. A HAJRA-2025-13C  
 EXPNO 392  
 PROCNO 1

F2 - Acquisition Parameters  
 Date\_ 20251116  
 Time\_ 13.31  
 INSTRUM spect  
 PROBHD 5 mm PABBO BB/  
 PULPROG zgpg30  
 TD 32768  
 SOLVENT DMSO  
 NS 1800  
 DS 2  
 SWH 24038.461 Hz  
 FIDRES 0.733596 Hz  
 AQ 0.6815744 sec  
 RG 186.42  
 DW 20.800 usec  
 DE 6.50 usec  
 TE 289.8 K  
 D1 2.00000000 sec  
 D11 0.03000000 sec  
 TD0 1

===== CHANNEL f1 =====  
 SFO1 100.6278588 MHz  
 NUC1 13C  
 P1 8.90 usec  
 PLW1 54.00000000 W

===== CHANNEL f2 =====  
 SFO2 400.1516006 MHz  
 NUC2 1H  
 CPDPRG[2] waltz16  
 PCPD2 90.00 usec  
 PLW2 12.00000000 W  
 PLW12 0.32231000 W  
 PLW13 0.16212000 W

F2 - Processing parameters  
 SI 16384  
 SF 100.6178346 MHz  
 WDW EM  
 SSB 0  
 LB 1.00 Hz  
 GB 0  
 FC 1.40

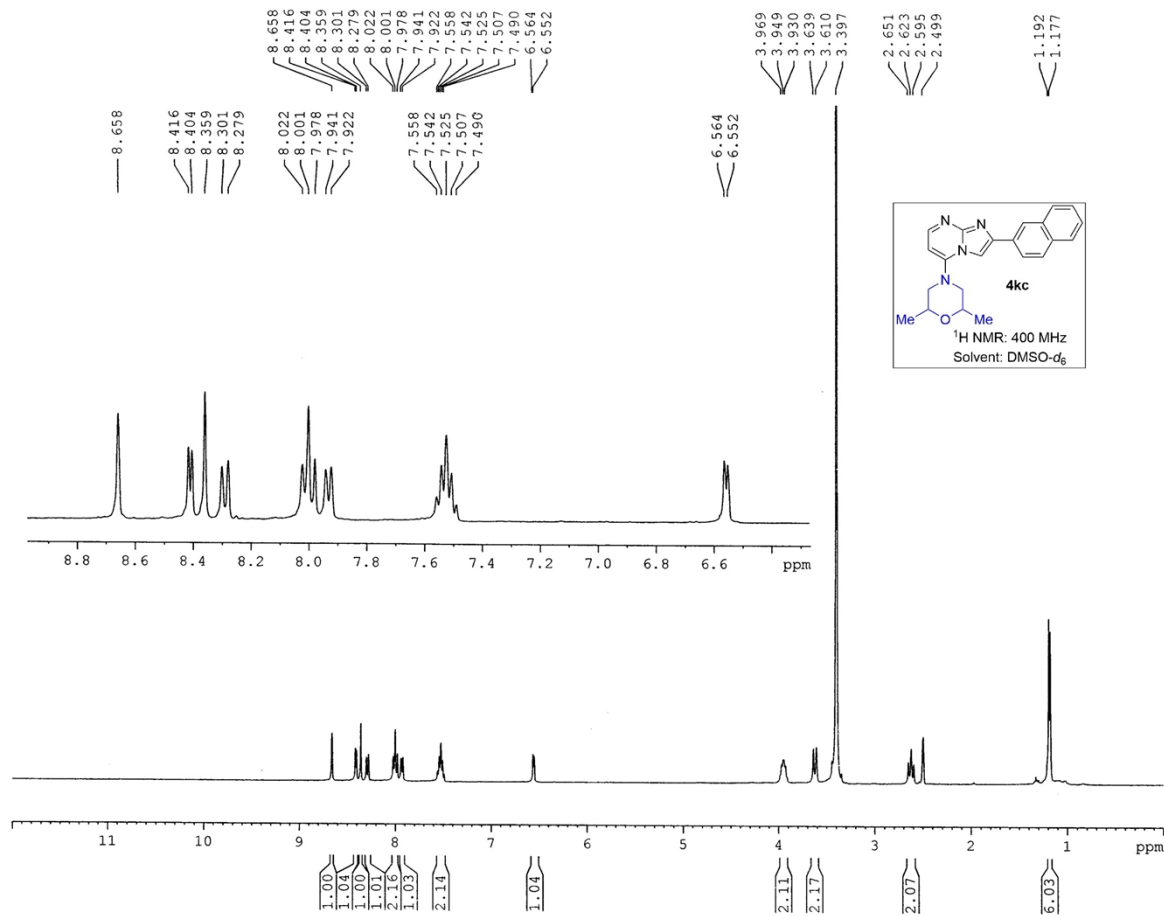

Current Data Parameters  
 NAME Dr. A HAJRA 2026 1H  
 EXPNO 276  
 PROCNO 1

F2 - Acquisition Parameters  
 Date\_ 20260506  
 Time\_ 12.00  
 INSTRUM spect  
 PROBHD 5 mm PABBO BB/  
 PULPROG zg30  
 TD 32768  
 SOLVENT DMSO  
 NS 8  
 DS 2  
 SWH 8223.685 Hz  
 FIDRES 0.250967 Hz  
 AQ 1.9922944 sec  
 RG 87.66  
 DW 60.800 usec  
 DE 6.50 usec  
 TE 294.2 K  
 D1 1.00000000 sec  
 TDO 1

==== CHANNEL f1 =====  
 SFO1 400.1524711 MHz  
 NUC1 1H  
 P1 14.75 usec  
 PLW1 12.00000000 W

F2 - Processing parameters  
 SI 16384  
 SF 400.1500032 MHz  
 WDW EM  
 SSB 0  
 LB 0.30 Hz  
 GB 0  
 PC 1.00

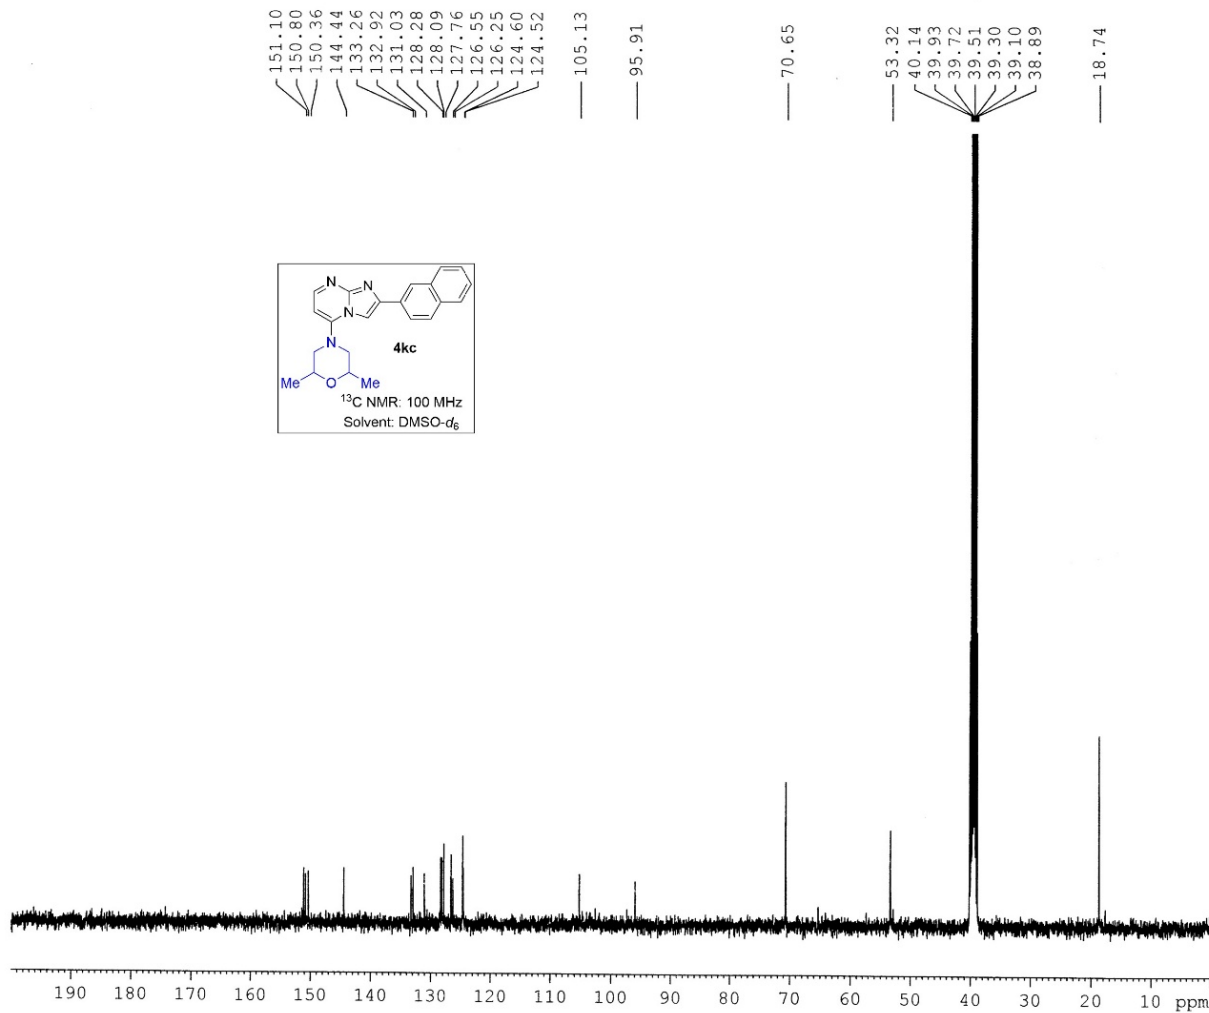

Current Data Parameters  
 NAME Dr. A HAJRA-2025-13C  
 EXPNO 414  
 PROCNO 1

F2 - Acquisition Parameters  
 Date\_ 20251209  
 Time 12.25  
 INSTRUM spect  
 PROBHD 5 mm PABBO BB/  
 PULPROG zgpg30  
 TD 32768  
 SOLVENT DMSO  
 NS 260  
 DS 2  
 SWH 24038.461 Hz  
 FIDRES 0.733596 Hz  
 AQ 0.6815744 sec  
 RG 186.42  
 DW 20.800 usec  
 DE 6.50 usec  
 TE 287.7 K  
 D1 2.00000000 sec  
 D11 0.03000000 sec  
 TDO 1

===== CHANNEL f1 =====  
 SFO1 100.6278588 MHz  
 NUC1 13C  
 P1 8.90 usec  
 PLW1 54.00000000 W

===== CHANNEL f2 =====  
 SFO2 400.1516006 MHz  
 NUC2 1H  
 CPDPRGf2 waltz16  
 PCPD2 90.00 usec  
 PLW2 12.00000000 W  
 PLW12 0.32231000 W  
 PLW13 0.16212000 W

F2 - Processing parameters  
 SI 16384  
 SF 100.6178354 MHz  
 WDW EM  
 SSB 0  
 LB 1.00 Hz  
 GB 0  
 PC 1.40

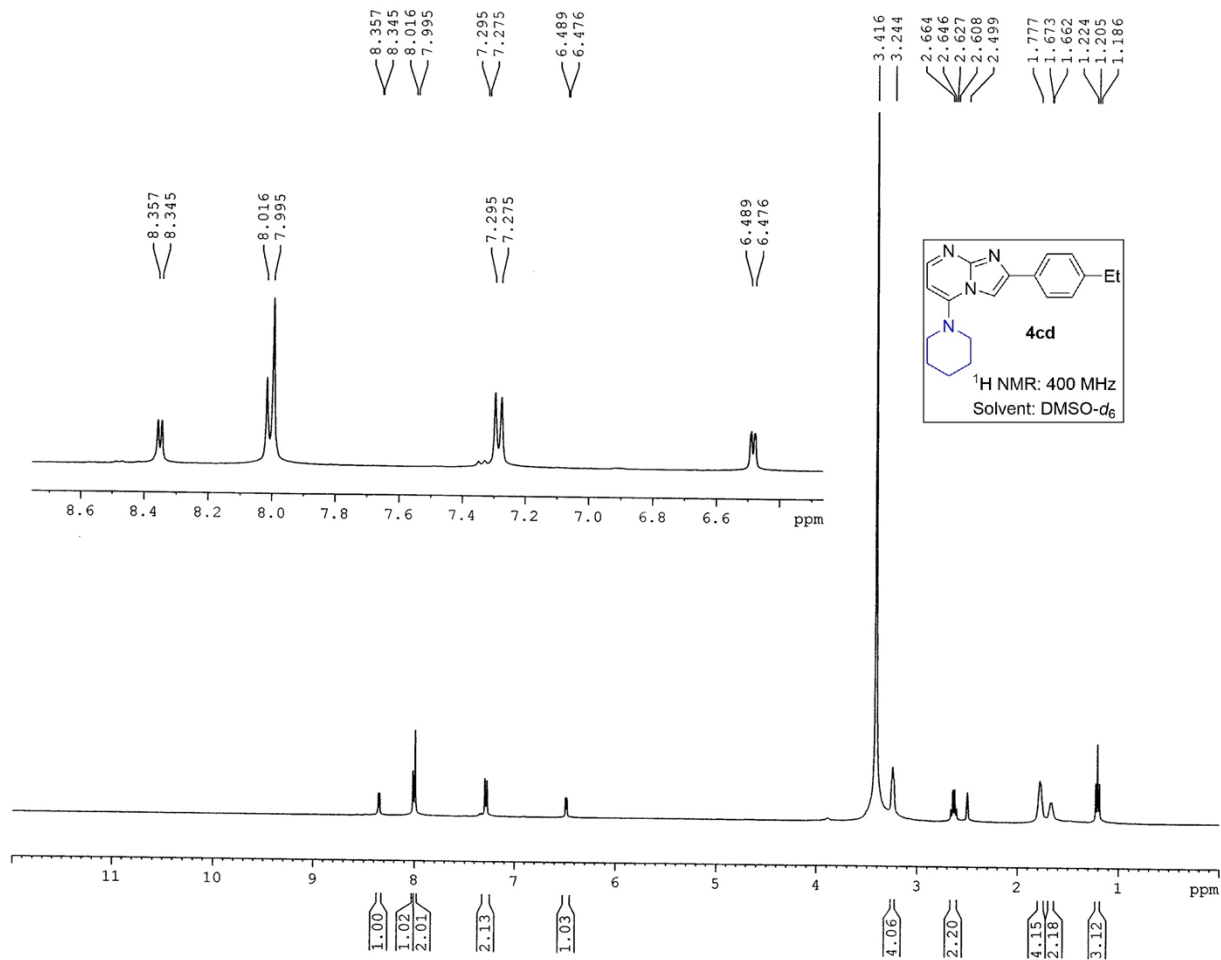

Current Data Parameters  
 NAME Dr. A HAJRA 2026 1H  
 EXPNO 272  
 PROCNO 1

F2 - Acquisition Parameters  
 Date\_ 20260503  
 Time 12.26  
 INSTRUM spect  
 PROBHD 5 mm PABBO BB/  
 PULPROG zg30  
 TD 32768  
 SOLVENT DMSO  
 NS 8  
 DS 2  
 SWH 8223.685 Hz  
 FIDRES 0.250967 Hz  
 AQ 1.9922944 sec  
 RG 62.69  
 DW 60.800 usec  
 DE 6.50 usec  
 TE 292.8 K  
 D1 1.00000000 sec  
 TD0 1

===== CHANNEL f1 =====  
 SF01 400.1524711 MHz  
 NUC1 1H  
 P1 14.75 usec  
 PLW1 12.00000000 W

F2 - Processing parameters  
 SI 16384  
 SF 400.1500031 MHz  
 WDW EM  
 SSB 0  
 LB 0.30 Hz  
 GB 0  
 PC 1.00

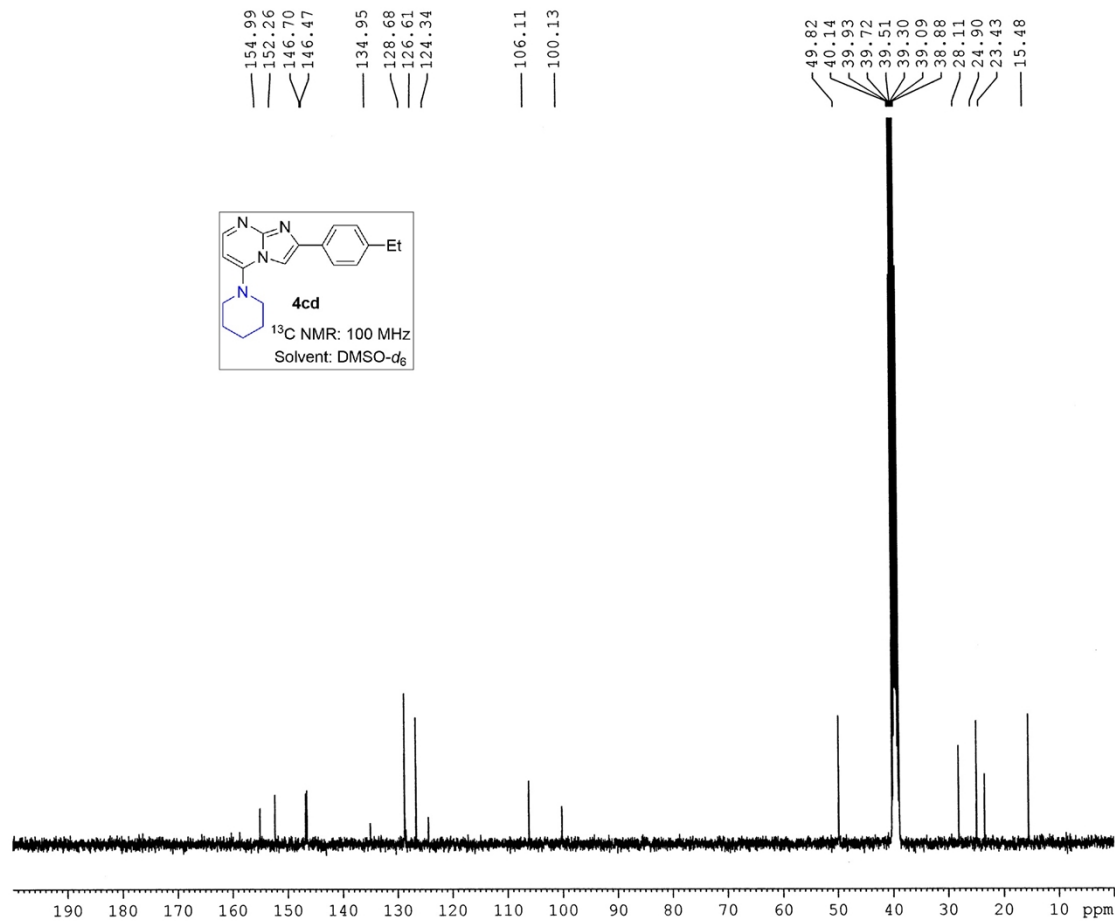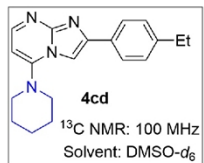

Current Data Parameters  
 NAME Dr. A HAJRA-2025-13C  
 EXPNO 250  
 PROCNO 1

F2 - Acquisition Parameters  
 Date\_ 20250722  
 Time 14.44  
 INSTRUM spect  
 PROBHD 5 mm PABBO BB/  
 PULPROG zgpg30  
 TD 32768  
 SOLVENT DMSO  
 NS 2000  
 DS 2  
 SWH 24038.461 Hz  
 FIDRES 0.733596 Hz  
 AQ 0.6815744 sec  
 RG 186.42  
 DW 20.800 usec  
 DE 6.50 usec  
 TE 292.7 K  
 D1 2.0000000 sec  
 D11 0.0300000 sec  
 TDO 1

----- CHANNEL f1 -----  
 SFO1 100.6278588 MHz  
 NUC1 13C  
 P1 8.90 usec  
 PLW1 54.0000000 W

----- CHANNEL f2 -----  
 SFO2 400.1516906 MHz  
 NUC2 1H  
 CPDPRG[2] waltz16  
 PCPD2 90.00 usec  
 PLW2 12.0000000 W  
 PLW12 0.32231000 W  
 PLW13 0.16212000 W

F2 - Processing parameters  
 SI 16384  
 SF 100.6178361 MHz  
 WDW EM  
 SSB 0  
 LB 1.00 Hz  
 GB 0  
 PC 1.40

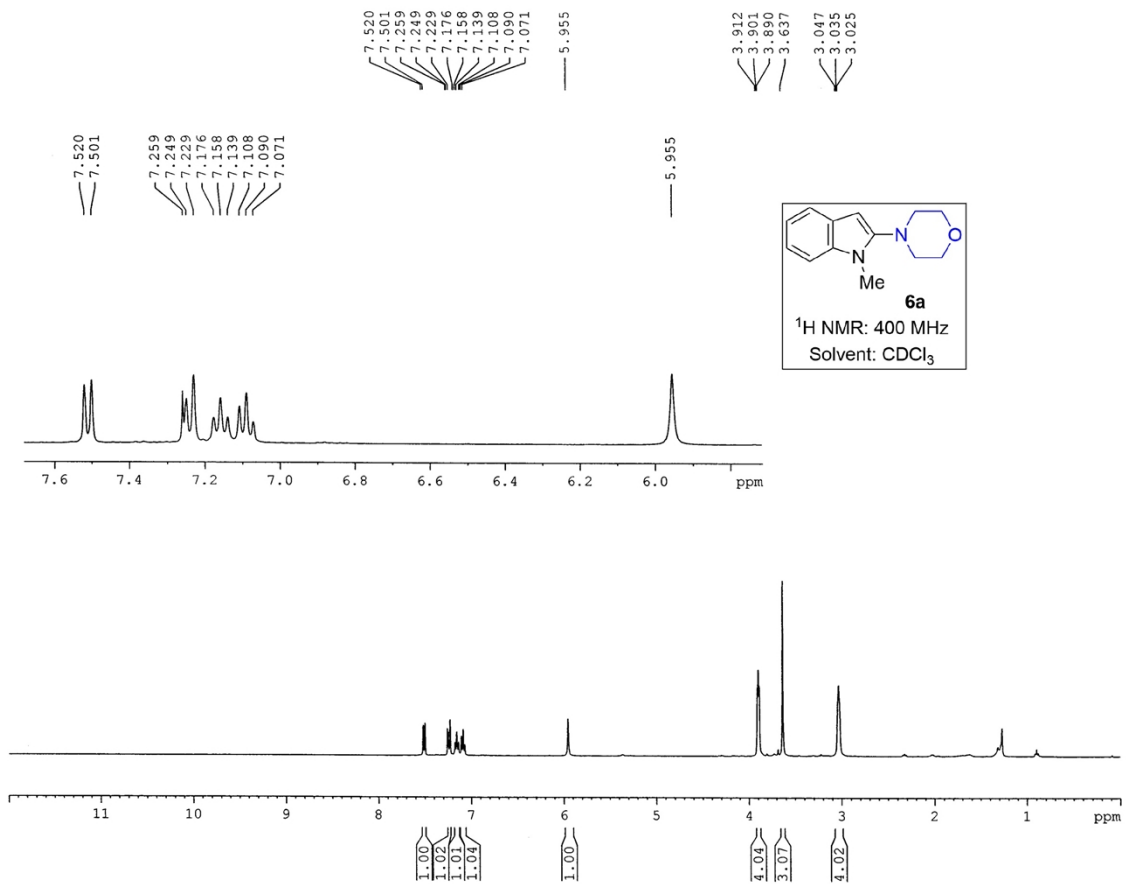

Current Data Parameters  
 NAME Dr. A HAJRA 2025 1H  
 EXPNO 641  
 PROCNO 1

F2 - Acquisition Parameters  
 Date\_ 20251031  
 Time 12.16  
 INSTRUM spect  
 PROBHD 5 mm PABBO BB/  
 PULPROG zg30  
 TD 32768  
 SOLVENT CDCl3  
 NS 8  
 DS 2  
 SWH 8223.685 Hz  
 FIDRES 0.250967 Hz  
 AQ 1.9922944 sec  
 RG 67.81  
 DW 60.800 usec  
 DE 6.50 usec  
 TE 291.9 K  
 D1 1.00000000 sec  
 TDO 1

==== CHANNEL f1 =====  
 SFO1 400.1524711 MHz  
 NUC1 1H  
 P1 14.75 usec  
 PLW1 12.00000000 W

F2 - Processing parameters  
 SI 16384  
 SF 400.1500097 MHz  
 WDW EM  
 SSB 0  
 LB 0.30 Hz  
 GB 0  
 PC 1.00

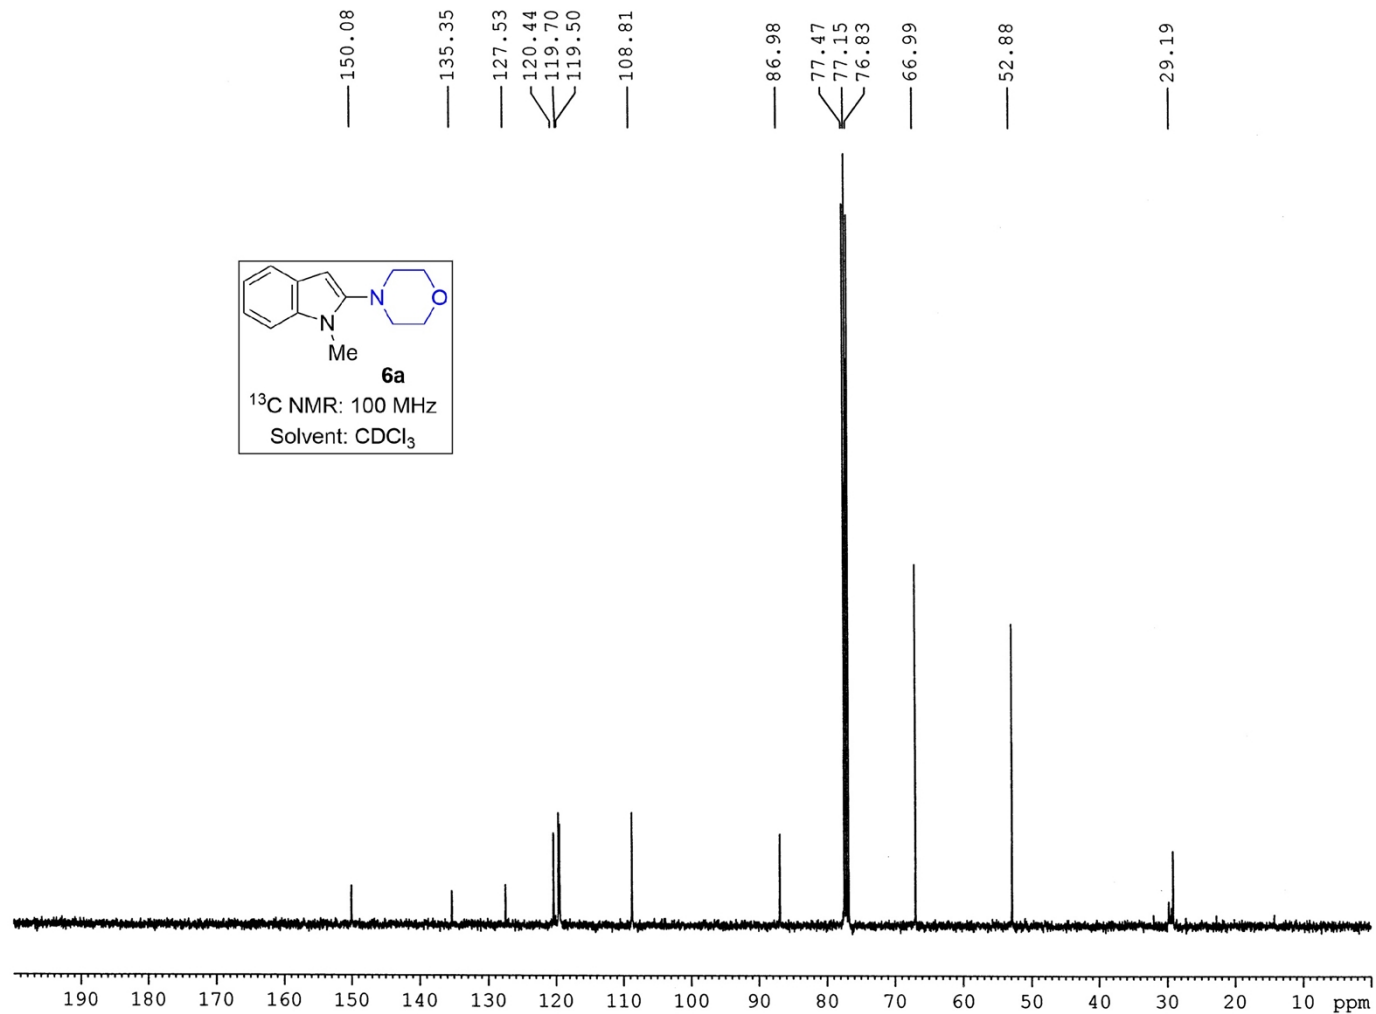

Current Data Parameters  
 NAME Dr. A HAJRA-2025-13C  
 EXPNO 371  
 PROCNO 1

F2 - Acquisition Parameters  
 Date\_ 20251031  
 Time 12.43  
 INSTRUM spect  
 PROBHD 5 mm PABBO BB/  
 PULPROG zgpg30  
 TD 32768  
 SOLVENT CDCl3  
 NS 420  
 DS 2  
 SWH 24038.461 Hz  
 FIDRES 0.733596 Hz  
 AQ 0.6815744 sec  
 RG 186.42  
 DW 20.800 usec  
 DE 6.50 usec  
 TE 291.8 K  
 D1 2.00000000 sec  
 D11 0.03000000 sec  
 TD0 1

===== CHANNEL f1 =====  
 SFO1 100.6278588 MHz  
 NUC1 13C  
 P1 8.90 usec  
 PLW1 54.00000000 W

===== CHANNEL f2 =====  
 SFO2 400.1516006 MHz  
 NUC2 1H  
 CPDPRG[2] waltz16  
 PCPD2 90.00 usec  
 PLW2 12.00000000 W  
 PLW12 0.32231000 W  
 PLW13 0.16212000 W

F2 - Processing parameters  
 SI 16384  
 SF 100.6177902 MHz  
 WDW EM  
 SSB 0  
 LB 1.00 Hz  
 GB 0  
 PC 1.40
